# Supplementary material for: Reagent-free aerobic oxidative synthesis of amides from aldehydes and isothiocyanates
Source: Royal Society of Chemistry journal article supplement (doi:10.1039/d0qo01264e), 2020-11-27

## Supporting Information

### Contents

|                                                  |    |
|--------------------------------------------------|----|
| 1. General information .....                     | 2  |
| 2. General procedure .....                       | 3  |
| 3. Screening parameters .....                    | 4  |
| 4. Control experiments .....                     | 6  |
| 5. Characterization data .....                   | 7  |
| 6. Copies of NMR spectra of some compounds ..... | 19 |

## 1. General information

All solvents and reagents were purchased from the suppliers and used without further purification unless otherwise noted. The melting points (uncorrected) were taken on an X4 Electrothermal Micromelting point meter.  $^1\text{H}$  NMR (400 MHz) and  $^{13}\text{C}$  NMR (100 MHz) spectra were recorded in solvents  $\text{CDCl}_3$  or  $\text{DMSO}-d_6$  at room temperature on Bruker Avance III 400 spectrometer. The chemical-shift scale is based on internal TMS. High-resolution mass spectra were acquired on Waters UPLC/Xevo G2 quadrupole time-of-flight tandem mass spectrometry (Xevo G2 Q-TOF).

## 2. General procedure

Isothiocyanates **1** (0.2 mmol, 1.0 equiv), aldehydes **2** (10 equiv), 1,2-dichloroethane (DCE) (0.25 mL, 0.8 M based on **1**) were placed in a 10 mL reaction tube, flushed with O<sub>2</sub>, and sealed under O<sub>2</sub> atmosphere. The reaction system was moved to 115 °C (preheated oil bath) and stirred for 36 hours. Then the reaction mixture was concentrated and the residue was chromatographed through silica gel eluting with ethyl acetate/petroleum ether (1:10, v/v) to give the products.

### 3. Screening parameters

#### 3.1 Optimization of reactions with respect to aldehydes

**Table S1** Optimizing reaction conditions for autoxidation

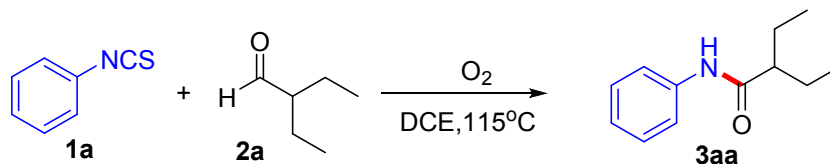

| Entry           | <b>2a</b> (equiv) | Temp (°C) | Solvent            | Conc.(M) | Time (h) | Yield (%) <sup>c</sup> |
|-----------------|-------------------|-----------|--------------------|----------|----------|------------------------|
| 1               | 10                | 115       | DCE                | 0.1      | 36h      | 49                     |
| 2               | 10                | 115       | DCE                | 0.3      | 36h      | 52                     |
| 3               | 10                | 115       | DCE                | 0.5      | 36h      | 75                     |
| 4               | 10                | 115       | DCE                | 0.8      | 36h      | 86                     |
| 5               | 10                | 115       | DCE                | 1        | 36h      | 71                     |
| 6               | 10                | 115       | EtOAc              | 0.8      | 36h      | 75                     |
| 7               | 10                | 115       | DCM                | 0.8      | 36h      | 77                     |
| 8               | 10                | 115       | CH <sub>3</sub> OH | 0.8      | 36h      | 27                     |
| 9               | 10                | 115       | CH <sub>3</sub> CN | 0.8      | 36h      | Trace                  |
| 10              | 10                | 115       | H <sub>2</sub> O   | 0.8      | 36h      | 15                     |
| 11              | 10                | 115       | DMF                | 0.8      | 36h      | 45                     |
| 12              | 10                | 115       | Toluene            | 0.8      | 36h      | 43                     |
| 13              | 10                | 115       | Chlorobenzene      | 0.8      | 36h      | 41                     |
| 14              | 10                | 115       | 1,4-Dioxane        | 0.8      | 36h      | 43                     |
| 15              | 6                 | 115       | DCE                | 0.8      | 36h      | 51                     |
| 16              | 8                 | 115       | DCE                | 0.8      | 36h      | 75                     |
| 17              | 12                | 115       | DCE                | 0.8      | 36h      | 84                     |
| 18              | 14                | 115       | DCE                | 0.8      | 36h      | 84                     |
| 19              | 10                | 80        | DCE                | 0.8      | 36h      | Trace                  |
| 20              | 10                | 100       | DCE                | 0.8      | 36h      | Trace                  |
| 21              | 10                | 110       | DCE                | 0.8      | 36h      | 50                     |
| 22              | 10                | 120       | DCE                | 0.8      | 36h      | 83                     |
| 23              | 10                | 140       | DCE                | 0.8      | 36h      | 82                     |
| 24 <sup>a</sup> | 10                | 115       | DCE                | 0.8      | 36h      | trace                  |
| 25 <sup>b</sup> | 10                | 115       | DCE                | 0.8      | 36h      | 71                     |
| 26              | 10                | 115       | DCE                | 0.8      | 24h      | 63                     |
| 27              | 10                | 115       | DCE                | 0.8      | 48h      | 85                     |

Reaction condition: a solution of isothiocyante **1a** (0.2 mmol), solvent (0.25 ml, 0.8 M) and isobutyraldehyde (**2a**) (2 mmol) sealed in a 10 mL tube flushed with O<sub>2</sub>, stirred at 115 °C. [a] Under Ar. [b] Under air. [c] Isolated yield. DCE = 1,2-dichloroethane, DCM = dichloromethane.

### 3.2 Optimization of reactions with respect to carboxylic acids

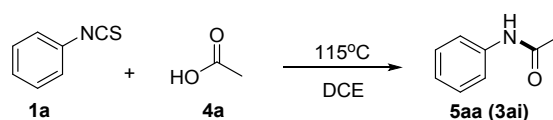

**Table S2** Effect of substrate molar ratios

| Entry | Molar ratio (4a:1a) | Isolated yield (%) |
|-------|---------------------|--------------------|
| 1     | 10                  | 92                 |
| 2     | 7                   | 93                 |
| 3     | 4                   | 93                 |
| 4     | 2                   | 95                 |
| 5     | 1                   | 96                 |

Reaction conditions: **1a** (0.2 mmol), **4a**, DCE (0.5 M), 115 °C, 36 h, under air.

**Table S3** Effect of solvents

| Entry | Solvent            | Isolated yield (%) |
|-------|--------------------|--------------------|
| 1     | DCE                | 96                 |
| 2     | EtOAc              | 30                 |
| 3     | DCM                | 89                 |
| 4     | CH <sub>3</sub> OH | 47                 |
| 5     | CH <sub>3</sub> CN | 70                 |
| 6     | H <sub>2</sub> O   | 57                 |
| 7     | DMF                | 71                 |
| 8     | Toluene            | 45                 |
| 9     | Chlorobenzene      | 32                 |
| 10    | 1,4-Dioxane        | 47                 |
| 11    | DMSO               | 36                 |

Reaction conditions: **1a** (0.2 mmol), **4a** (0.2 mmol), solvent (0.5 M), 115 °C, 36 h, under air.

**Table S4** Effect of reaction concentrations

| Entry | Concentration (M) | Isolated yield (%) |
|-------|-------------------|--------------------|
| 1     | 0.10              | 50                 |
| 2     | 0.25              | 96                 |
| 3     | 0.50              | 96                 |
| 4     | 0.75              | 91                 |
| 5     | 1.00              | 89                 |

Reaction conditions: **1a** (0.2 mmol), **4a** (0.2 mmol), 115 °C, 36 h, under air.

## 4. Control experiments

### a) Use of TEMPO as trapper

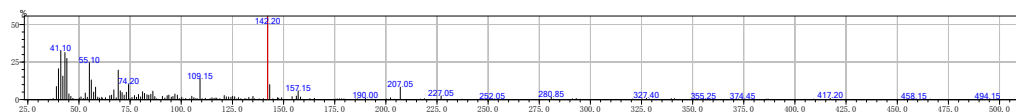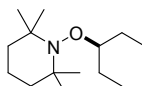

*m/e Found: 227.05, Calcd: 227.22*

Figure S-1 Mass spectrum of the TEMPO-alkyl adduct

### b) Use of DPE as trapper

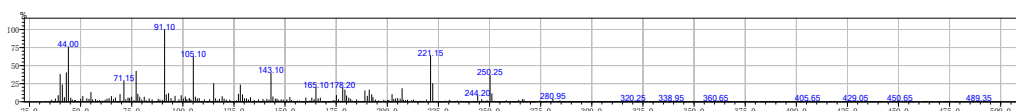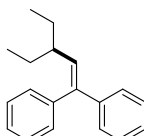

*m/e Found: 250.25, Calcd: 250.17*

Figure S-2 Mass spectrum of the DPE-alkyl adduct

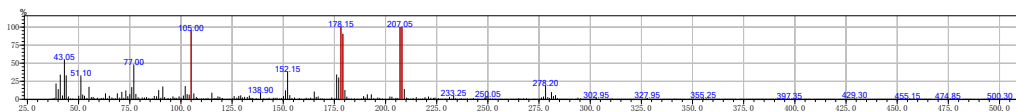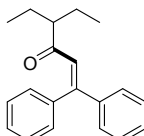

*m/e Found: 278.20, Calcd: 278.17*

Figure S-3 Mass spectrum of the DPE-acyl adduct

## 5.Characterization data

### 2-ethyl-*N*-phenylbutanamide (3aa)

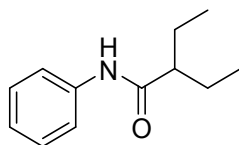

Yield 86%, white solid, mp 127-128 °C. <sup>1</sup>H NMR (400 MHz, CDCl<sub>3</sub>) δ 7.55 (d, *J* = 7.7 Hz, 2H), 7.38 (s, 1H), 7.31 (t, *J* = 7.9 Hz, 2H), 7.10 (t, *J* = 7.4 Hz, 1H), 2.08 – 2.01 (m, 1H), 1.77– 1.66 (m, 2H), 1.61 – 1.50 (m, 2H), 0.95 (t, *J* = 7.4 Hz, 6H). <sup>13</sup>C NMR (100 MHz, CDCl<sub>3</sub>) δ 174.4, 138.0, 129.0, 124.2, 120.0, 52.4, 25.9, 12.1. HRMS (ESI): Calcd for C<sub>12</sub>H<sub>18</sub>NO [M+H]<sup>+</sup>: 192.13829; Found: 192.13796.

### 2-ethyl-*N*-(*p*-tolyl)butanamide (3ba)

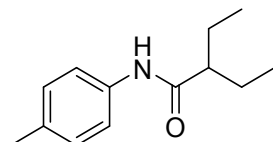

Yield 82%, white solid, mp 107-108 °C. <sup>1</sup>H NMR (400 MHz, CDCl<sub>3</sub>) δ 7.42 (d, *J* = 8.4 Hz, 2H), 7.17 (s, 1H), 7.12 (d, *J* = 8.3 Hz, 2H), 2.31 (s, 3H), 2.05 – 1.97 (m, 1H), 1.77 – 1.66 (m, 2H), 1.60 – 1.50 (m, 2H), 0.95 (t, *J* = 7.4 Hz, 6H). <sup>13</sup>C NMR (100 MHz, CDCl<sub>3</sub>) δ 174.1, 135.4, 133.8, 129.4, 120.0, 52.4, 25.9, 20.8, 12.1. Calcd for C<sub>13</sub>H<sub>20</sub>NO [M+H]<sup>+</sup>: 256.15394; Found: 256.15338.

### 2-ethyl-*N*-(4-methoxyphenyl)butanamide (3ca)

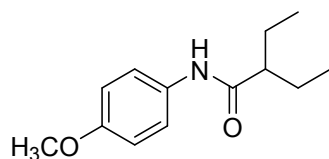

Yield 83%, white solid, mp 128-129 °C. <sup>1</sup>H NMR (400 MHz, CDCl<sub>3</sub>) δ 7.50 – 7.42 (m, 2H), 7.25 (s, 1H), 6.87 – 6.83 (m, 2H), 3.78 (s, 3H), 2.05 – 1.97 (m, 1H), 1.77 – 1.65 (m, 2H), 1.60 – 1.49 (m, 2H), 0.95 (t, *J* = 7.4 Hz, 6H). <sup>13</sup>C NMR (100 MHz, CDCl<sub>3</sub>) δ 174.1, 156.4, 131.1, 121.9, 114.1, 55.5, 52.2, 25.9, 12.1. Calcd for C<sub>13</sub>H<sub>20</sub>NO<sub>2</sub> [M+H]<sup>+</sup>: 222.14886; Found: 222.14816.

### *N*-(4-chlorophenyl)-2-ethylbutanamide (3da)

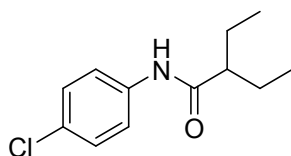

Yield 87%, white solid, mp 132-133 °C. <sup>1</sup>H NMR (400 MHz, CDCl<sub>3</sub>) δ 7.49 (t, *J* = 5.8 Hz, 2H), 7.32 (s, 1H), 7.27 (dd, *J* = 9.1, 2.6 Hz, 2H), 2.07 – 2.00 (m, 1H), 1.77 – 1.65 (m, 2H), 1.61 – 1.51 (m, 2H), 0.95 (t, *J* = 7.4 Hz, 6H). <sup>13</sup>C NMR (100 MHz, CDCl<sub>3</sub>) δ 174.4, 136.5, 129.2, 128.9, 121.2, 52.3, 25.8, 12.1. Calcd for C<sub>12</sub>H<sub>17</sub>ClNO [M+H]<sup>+</sup>: 226.09932; Found: 226.09892.

### 2-ethyl-N-(4-fluorophenyl)butanamide (3ea)

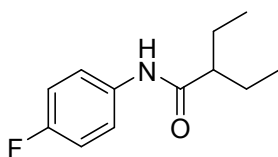

Yield 84%, white solid, mp 104-106 °C. <sup>1</sup>H NMR (400 MHz, CDCl<sub>3</sub>) δ 7.50 (dd, *J* = 8.8, 4.8 Hz, 2H), 7.34 (s, 1H), 7.00 (t, *J* = 8.6 Hz, 2H), 2.06 – 1.99 (m, 1H), 1.77 – 1.66 (m, 2H), 1.61 – 1.51 (m, 2H), 0.95 (t, *J* = 7.4 Hz, 6H). <sup>13</sup>C NMR (100 MHz, CDCl<sub>3</sub>) δ 174.3, 159.3(d, *J* = 242 Hz), 133.9(d, *J* = 2.7 Hz), 121.9(d, *J* = 7.8 Hz), 115.5(d, *J* = 22.3 Hz), 52.2, 25.8, 12.1. Calcd for C<sub>12</sub>H<sub>17</sub>FNO [M+H]<sup>+</sup>: 210.12887; Found: 210.12872.

### 2-ethyl-N-(4-(trifluoromethyl)phenyl)butanamide (3fa)

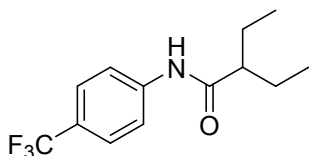

Yield 72%, white solid, mp 125-126 °C. <sup>1</sup>H NMR (400 MHz, CDCl<sub>3</sub>) δ 7.69 (d, *J* = 8.5 Hz, 2H), 7.57 (d, *J* = 8.6 Hz, 2H), 7.44 (s, 1H), 2.10 – 2.04 (m, 1H), 1.78 – 1.67 (m, 2H), 1.63 – 1.53 (m, 2H), 0.96 (t, *J* = 7.4 Hz, 6H). <sup>13</sup>C NMR (100 MHz, CDCl<sub>3</sub>) δ 174.7, 140.9, 126.2(q, *J* = 3.8 Hz), 124.1(q, *J* = 269.8 Hz), 119.5, 52.4, 25.8, 12.0. Calcd for C<sub>13</sub>H<sub>17</sub>F<sub>3</sub>NO [M+H]<sup>+</sup>: 260.12568; Found: 260.12506.

### 2-ethyl-N-(*m*-tolyl)butanamide (3ga)

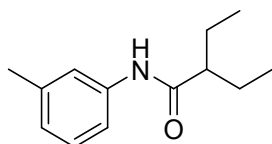



Yield 83%, white solid, mp 81-82 °C. <sup>1</sup>H NMR (400 MHz, CDCl<sub>3</sub>) δ 7.45 (s, 1H), 7.30 (d, *J* = 8.1 Hz, 1H), 7.24 (s, 1H), 7.19 (t, *J* = 7.8 Hz, 1H), 6.92 (d, *J* = 7.5 Hz, 1H), 2.33 (s, 3H), 2.05 – 2.00 (m, 1H), 1.77 – 1.66 (m, 2H), 1.61 – 1.50 (m, 2H), 0.95 (t, *J* = 7.4 Hz, 6H). <sup>13</sup>C NMR (100 MHz, CDCl<sub>3</sub>) δ 174.3, 138.9, 137.9, 128.8, 125.0, 120.6, 117.0, 52.5, 25.9, 21.5, 12.1. Calcd for C<sub>13</sub>H<sub>20</sub>NO [M+H]<sup>+</sup>: 206.15394; Found: 206.15349.

### 2-ethyl-*N*-(3-methoxyphenyl)butanamide (3ha)

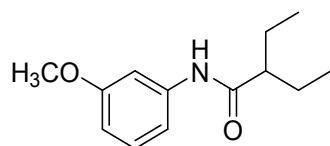

Yield 78%, white solid, mp 104-106 °C. <sup>1</sup>H NMR (400 MHz, CDCl<sub>3</sub>) δ 7.40 (t, *J* = 2.0 Hz, 1H), 7.24 (s, 1H), 7.20 (t, *J* = 8.1 Hz, 1H), 6.97 (d, *J* = 8.0 Hz, 1H), 6.66 (dd, *J* = 8.2, 2.2 Hz, 1H), 3.80 (s, 3H), 2.04 – 2.00 (m, 1H), 1.78 – 1.66 (m, 2H), 1.61 – 1.51 (m, 2H), 0.96 (t, *J* = 7.4 Hz, 6H). <sup>13</sup>C NMR (100 MHz, CDCl<sub>3</sub>) δ 174.3, 160.2, 139.2, 129.6, 111.81, 110.3, 105.4, 55.3, 52.6, 25.9, 12.1. Calcd for C<sub>13</sub>H<sub>20</sub>NO<sub>2</sub> [M+H]<sup>+</sup>: 222.14886; Found: 222.14832.

### *N*-(3-chlorophenyl)-2-ethylbutanamide (3ia)

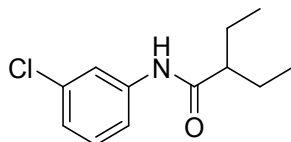

Yield 86%, white solid, mp 101-102 °C. <sup>1</sup>H NMR (400 MHz, CDCl<sub>3</sub>) δ 7.69 (d, *J* = 1.7 Hz, 1H), 7.52 (s, 1H), 7.39 (d, *J* = 8.1 Hz, 1H), 7.22 (t, *J* = 8.1 Hz, 1H), 7.07 (d, *J* = 8.0 Hz, 1H), 2.09 – 2.02 (m, 1H), 1.78 – 1.65 (m, 2H), 1.61 – 1.50 (m, 2H), 0.94 (t, *J* = 7.4 Hz, 6H). <sup>13</sup>C NMR (100 MHz, CDCl<sub>3</sub>) δ 174.7, 139.1, 134.6, 129.9, 124.2, 120.1, 117.9, 52.3, 25.8, 12.1. Calcd for C<sub>12</sub>H<sub>17</sub>ClNO [M+H]<sup>+</sup>: 226.09932; Found: 226.09882.

### 2-ethyl-*N*-(*p*-tolyl)hexanamide (3bb)

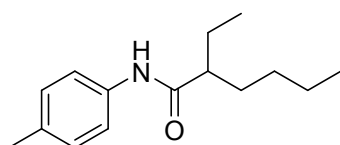

Yield 83%, white solid, mp 110-111 °C. <sup>1</sup>H NMR (400 MHz, CDCl<sub>3</sub>) δ 7.42 (d, *J* = 7.6 Hz, 2H), 7.12 (d, *J* = 7.0 Hz, 3H), 2.31 (s, 3H), 2.10 – 2.03 (m, 2H), 1.77 – 1.66 (m, 2H), 1.58 – 1.50 (m, 2H), 1.27 – 1.32 (m, 4H), 0.95 (t, *J* = 7.2 Hz, 3H), 0.89 (d, *J* = 5.3 Hz, 3H). <sup>13</sup>C NMR (100 MHz, CDCl<sub>3</sub>) δ 174.2, 135.3, 133.8, 129.4, 120.0, 50.8, 32.6, 29.9, 26.2, 22.8, 20.8, 14.0, 12.1. Calcd for C<sub>15</sub>H<sub>24</sub>NO [M+H]<sup>+</sup>: 234.18524; Found: 234.18459.

***N*-(4-chlorophenyl)-2-ethylhexanamide (3db)**

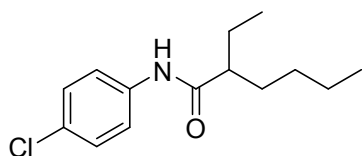

Yield 79%, white solid, mp 122-123 °C. <sup>1</sup>H NMR (400 MHz, CDCl<sub>3</sub>) δ 7.50 (d, *J* = 8.8 Hz, 2H), 7.30 (s, 1H), 7.29 – 7.25 (m, 2H), 2.12 – 2.05 (m, 1H), 1.76 – 1.64 (m, 2H), 1.60 – 1.45 (m, 2H), 1.35 – 1.25 (m, 4H), 0.94 (t, *J* = 7.4 Hz, 3H), 0.88 (t, *J* = 6.7 Hz, 3H). <sup>13</sup>C NMR (100 MHz, CDCl<sub>3</sub>) δ 174.5, 136.5, 129.2, 128.9, 121.2, 50.8, 32.5, 29.9, 26.2, 22.8, 14.0, 12.1. Calcd for C<sub>14</sub>H<sub>21</sub>ClNO [M+H]<sup>+</sup>: 254.13062; Found: 254.12991.

**2-ethyl-*N*-(4-fluorophenyl)hexanamide (3eb)**

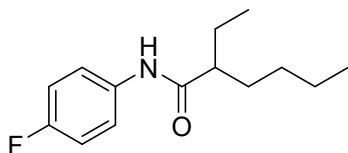

Yield 82%, white solid, mp 90-91 °C. <sup>1</sup>H NMR (400 MHz, CDCl<sub>3</sub>) δ 7.51 – 7.48 (m, 2H), 7.39 (s, 1H), 6.99 (t, *J* = 8.6 Hz, 2H), 2.13 – 2.06 (m, 1H), 1.76 – 1.65 (m, 2H), 1.60 – 1.47 (m, 2H), 1.38 – 1.22 (m, 4H), 0.95 (t, *J* = 7.4 Hz, 3H), 0.88 (t, *J* = 6.5 Hz, 3H). <sup>13</sup>C NMR (100 MHz, CDCl<sub>3</sub>) δ 174.5, 159.3(d, *J* = 241.9 Hz), 133.9(d, *J* = 2.7 Hz), 121.9(d, *J* = 7.8 Hz), 115.5(d, *J* = 22.3 Hz), 50.6, 32.6, 29.9, 26.2, 22.8, 14.0, 12.1. Calcd for C<sub>14</sub>H<sub>21</sub>FNO [M+H]<sup>+</sup>: 238.16017; Found: 238.15958.

**2-ethyl-*N*-(*m*-tolyl)hexanamide (3gb)**

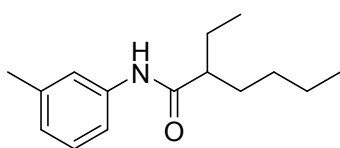

Yield 81%, white solid, mp 104-106 °C. <sup>1</sup>H NMR (400 MHz, CDCl<sub>3</sub>) δ 7.45 (s, 1H), 7.30 (d, *J* = 8.1 Hz, 1H), 7.24 – 7.16 (m, 2H), 6.92 (d, *J* = 7.5 Hz, 1H), 2.33 (s, 3H), 2.11 – 2.04 (m, 1H), 1.75 – 1.65 (m, 2H), 1.60 – 1.46 (m, 2H), 1.35 – 1.26 (m, 4H), 0.95 (t, *J* = 7.4 Hz, 3H), 0.88 (t, *J* = 6.8 Hz, 3H). <sup>13</sup>C NMR (100 MHz, CDCl<sub>3</sub>) δ 174.4, 138.9, 137.9, 128.8, 125.0, 120.6, 116.9, 50.9, 32.7, 29.9, 26.3, 22.8, 21.5, 14.0, 12.1. Calcd for C<sub>15</sub>H<sub>24</sub>NO [M+H]<sup>+</sup>: 234.18524; Found: 234.18460.

### ***N*-(3-chlorophenyl)-2-ethylhexanamide (3ib)**

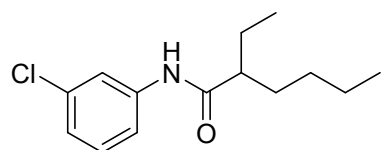

Yield 78%, white solid, mp 95-96 °C. <sup>1</sup>H NMR (400 MHz, CDCl<sub>3</sub>) δ 7.69 (s, 1H), 7.47 (s, 1H), 7.39 (d, *J* = 8.1 Hz, 1H), 7.22 (t, *J* = 8.1 Hz, 1H), 7.07 (d, *J* = 7.9 Hz, 1H), 2.14 – 2.07 (m, 1H), 1.76 – 1.67 (m, 2H), 1.60 – 1.47 (m, 2H), 1.36 – 1.26 (m, 4H), 0.94 (t, *J* = 7.4 Hz, 3H), 0.88 (t, *J* = 6.6 Hz, 3H). <sup>13</sup>C NMR (100 MHz, CDCl<sub>3</sub>) δ 174.7, 139.1, 134.6, 129.9, 124.2, 120.1, 117.9, 50.7, 32.5, 29.9, 26.2, 22.8, 14.0, 12.1. Calcd for C<sub>14</sub>H<sub>21</sub>ClNO [M+H]<sup>+</sup>: 254.13062; Found: 254.12985.

### **2-ethyl-*N*-phenylhexanamide (3ab)**

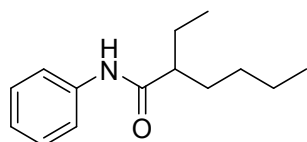

Yield 85%, white solid, mp 89-90 °C. <sup>1</sup>H NMR (400 MHz, CDCl<sub>3</sub>) δ 7.55 (d, *J* = 7.7 Hz, 2H), 7.32 (t, *J* = 7.9 Hz, 2H), 7.19 (s, 1H), 7.10 (t, *J* = 7.4 Hz, 1H), 2.11 – 2.05 (m, 1H), 1.76 – 1.63 (m, 2H), 1.59 – 1.47 (m, 2H), 1.36 – 1.26 (m, 4H), 0.96 (t, *J* = 7.4 Hz, 3H), 0.88 (t, *J* = 6.9 Hz, 3H). <sup>13</sup>C NMR (100 MHz, CDCl<sub>3</sub>) δ 174.4, 137.9, 129.0, 124.2, 119.9, 50.9, 32.6, 29.9, 26.2, 22.8, 14.0, 12.1. Calcd for C<sub>14</sub>H<sub>22</sub>NO [M+H]<sup>+</sup>: 220.16959; Found: 220.16911.

### **2,2-dimethyl-*N*-phenylpropanamide (3ac & 5ac)<sup>1</sup>**

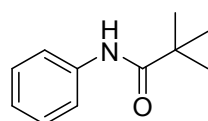

Yield 76%, white solid, mp 126-127 °C. <sup>1</sup>H NMR (500 MHz, CDCl<sub>3</sub>) δ 7.53 (d, *J* = 7.8 Hz, 2H), 7.31 – 7.34 (m, 3H), 7.30 (s, 1H), 7.10 (t, *J* = 7.4 Hz, 1H), 1.32 (s, 9H). <sup>13</sup>C NMR (125 MHz, CDCl<sub>3</sub>) δ 176.5, 138.0, 129.0, 124.2, 120.0, 39.6, 27.7.

Calcd for C<sub>11</sub>H<sub>16</sub>NO [M+H]<sup>+</sup>: 178.12264; Found: 178.12228.

### 2-methyl-*N*-phenylpentanamide (3ad)<sup>2</sup>

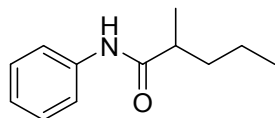

Yield 84%, white solid, mp 98-99 °C. <sup>1</sup>H NMR (400 MHz, CDCl<sub>3</sub>) δ 7.54 (d, *J* = 7.8 Hz, 2H), 7.33 (s, 1H), 7.31 (t, *J* = 7.9 Hz, 2H), 7.09 (t, *J* = 7.4 Hz, 1H), 2.40 – 2.31 (m, 1H), 1.77 – 1.69 (m, 1H), 1.48 – 1.32 (m, 3H), 1.22 (d, *J* = 6.8 Hz, 3H), 0.92 (t, *J* = 7.2 Hz, 3H). <sup>13</sup>C NMR (100 MHz, CDCl<sub>3</sub>) δ 175.1, 138.0, 128.9, 124.2, 119.9, 42.46, 36.61, 20.7, 17.9, 14.1. Calcd for C<sub>12</sub>H<sub>18</sub>NO [M+H]<sup>+</sup>: 192.13829; Found: 192.13774.

### 2-methyl-*N*-phenylbutanamide (3ae)

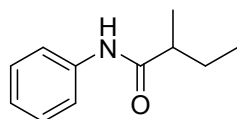

Yield 83%, white solid, mp 119-120 °C. <sup>1</sup>H NMR (400 MHz, CDCl<sub>3</sub>) δ 7.54 (d, *J* = 7.8 Hz, 2H), 7.33 (s, 1H), 7.31 (t, *J* = 7.8 Hz, 2H), 7.09 (t, *J* = 7.4 Hz, 1H), 2.31 – 2.23 (m, 1H), 1.82 – 1.71 (m, 1H), 1.57 – 1.46 (m, 1H), 1.22 (d, *J* = 6.8 Hz, 3H), 0.96 (t, *J* = 7.4 Hz, 3H). <sup>13</sup>C NMR (100 MHz, CDCl<sub>3</sub>) δ 174.9, 138.0, 129.0, 124.2, 119.9, 44.2, 27.4, 17.5, 11.9. Calcd for C<sub>11</sub>H<sub>16</sub>NO [M+H]<sup>+</sup>: 178.12264; Found: 178.12228.

### 2-methyl-*N*-phenylpropanamide (3af)<sup>3</sup>

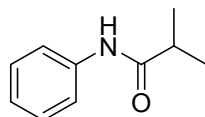

Yield 78%, white solid, mp 105-107 °C. <sup>1</sup>H NMR (400 MHz, CDCl<sub>3</sub>) δ 7.53 (d, *J* = 7.9 Hz, 2H), 7.31 (t, *J* = 7.9 Hz, 2H), 7.22 (s, 1H), 7.10 (t, *J* = 7.4 Hz, 1H), 2.51 (dt, *J* = 13.7, 6.9 Hz, 1H), 1.26 (d, *J* = 6.9 Hz, 6H). <sup>13</sup>C NMR (100 MHz, CDCl<sub>3</sub>) δ 175.2, 138.0, 129.0, 124.2, 119.8, 36.7, 19.6. Calcd for C<sub>10</sub>H<sub>14</sub>NO [M+H]<sup>+</sup>: 164.10699; Found: 164.10660.

### *N*-phenylbutanamide (3ag)<sup>4</sup>

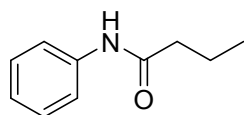

Yield 79%, white solid, mp 95-96 °C. <sup>1</sup>H NMR (400 MHz, CDCl<sub>3</sub>) δ 7.52 (d, *J* = 7.9 Hz, 2H), 7.36 (s, 1H), 7.31 (t, *J* = 7.7 Hz, 2H), 7.09 (t, *J* = 7.3 Hz, 1H), 2.33 (t, *J* = 7.4 Hz, 2H), 1.76 (dd, *J* = 14.9, 7.4 Hz, 2H), 1.00 (t, *J* = 7.4 Hz, 3H). <sup>13</sup>C NMR (100 MHz, CDCl<sub>3</sub>) δ 171.4, 138.0, 129.0, 124.2, 119.9, 39.7, 19.1, 13.8. Calcd for C<sub>10</sub>H<sub>14</sub>NO [M+H]<sup>+</sup>: 164.10699; Found: 164.10669.

#### ***N*-phenylpropanamide (3ah & 5ab)<sup>5</sup>**

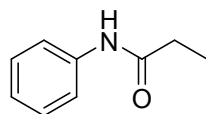

Yield 72%, white solid, mp 98-99 °C. <sup>1</sup>H NMR (400 MHz, CDCl<sub>3</sub>) δ 7.64 (s, 1H), 7.52 (d, *J* = 7.9 Hz, 2H), 7.29 (t, *J* = 7.9 Hz, 2H), 7.08 (t, *J* = 7.4 Hz, 1H), 2.37 (q, *J* = 7.6 Hz, 2H), 1.22 (t, *J* = 7.6 Hz, 3H). <sup>13</sup>C NMR (100 MHz, CDCl<sub>3</sub>) δ 172.4, 138.1, 128.9, 124.2, 120.0, 30.7, 9.7. Calcd for C<sub>9</sub>H<sub>12</sub>NO [M+H]<sup>+</sup>: 150.09134; Found: 150.09100.

#### ***N*-phenylethanamide (3ai & 5aa)<sup>6</sup>**

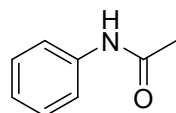

Yield 70%, white solid, mp 115-116 °C. <sup>1</sup>H NMR (400 MHz, CDCl<sub>3</sub>) δ 7.65 (s, 1H), 7.54 (d, *J* = 7.8 Hz, 2H), 7.34 (t, *J* = 7.8 Hz, 2H), 7.14 (t, *J* = 7.4 Hz, 1H), 2.20 (s, 3H). <sup>13</sup>C NMR (100 MHz, CDCl<sub>3</sub>) δ 168.6, 138.0, 129.0, 124.3, 120.0, 24.5. Calcd for C<sub>8</sub>H<sub>10</sub>NO [M+H]<sup>+</sup>: 136.07569; Found: 136.07553.

#### ***N*-phenylcyclohexanecarboxamide (3aj)<sup>7</sup>**

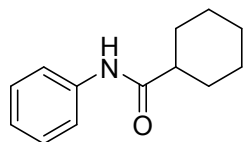

Yield 87%, white solid, mp 135-136 °C. <sup>1</sup>H NMR (400 MHz, CDCl<sub>3</sub>) δ 7.53 (d, *J* = 7.9 Hz, 2H), 7.32 – 7.26 (m, 3H), 7.09 (t, *J* = 7.4 Hz, 1H), 2.23 (tt, *J* = 11.6, 3.6 Hz, 1H), 1.93 – 1.97 (m, 2H), 1.82 – 1.85 (m, 2H), 1.69 – 1.71 (m, 1H), 1.59 – 1.49 (m,

2H), 1.35 – 1.23 (m, 3H).  $^{13}\text{C}$  NMR (100 MHz,  $\text{CDCl}_3$ )  $\delta$  174.4, 138.1, 129.0, 124.1, 119.8, 46.6, 29.7, 25.7. Calcd for  $\text{C}_{13}\text{H}_{18}\text{NO}$   $[\text{M}+\text{H}]^+$ : 204.13829; Found: 204.13783.

#### ***N*-phenylcyclopropanecarboxamide (3ak)<sup>8</sup>**

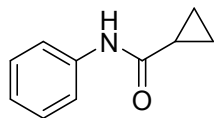

Yield 72%, white solid, mp 110-111 °C.  $^1\text{H}$  NMR (400 MHz,  $\text{CDCl}_3$ )  $\delta$  7.55 (s, 1H), 7.51 (d,  $J = 7.7$  Hz, 2H), 7.30 (t,  $J = 7.8$  Hz, 2H), 7.08 (t,  $J = 7.2$  Hz, 1H), 1.54 – 1.48(m, 1H), 1.10 – 1.06 (m, 2H), 0.85 – 0.81 (m, 2H).  $^{13}\text{C}$  NMR (100 MHz,  $\text{CDCl}_3$ )  $\delta$  171.9, 138.1, 129.0, 124.0, 119.7, 15.7, 7.9. Calcd for  $\text{C}_{10}\text{H}_{12}\text{NO}$   $[\text{M}+\text{H}]^+$ : 162.09134; Found: 162.09094.

#### **4-methyl-*N*-phenylbenzamide (3al)<sup>9</sup>**

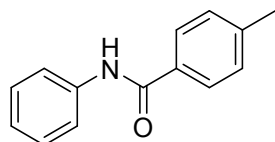

Yield 62%, white solid, mp 149-150 °C.  $^1\text{H}$  NMR (400 MHz,  $\text{DMSO}-d_6$ )  $\delta$  10.14 (s, 1H), 7.87 (d,  $J = 8.2$  Hz, 2H), 7.78 – 7.76 (m, 2H), 7.36 – 7.32 m, 4H), 7.09 (t,  $J = 7.4$  Hz, 1H), 2.39 (s, 3H).  $^{13}\text{C}$  NMR (100 MHz,  $\text{DMSO}-d_6$ )  $\delta$  165.8, 142.0, 139.7, 132.5, 129.4, 129.0, 128.1, 124.0, 120.8, 21.5.

#### **4-methoxy-*N*-phenylbenzamide (3am)<sup>10</sup>**

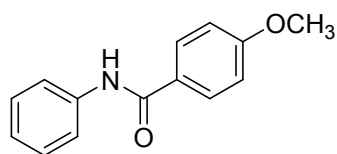

Yield 58%, white solid, mp 169-171 °C.  $^1\text{H}$  NMR (400 MHz,  $\text{DMSO}-d_6$ )  $\delta$  10.07 (s, 1H), 7.95 (d,  $J = 8.8$  Hz, 2H), 7.75 (d,  $J = 7.8$  Hz, 2H), 7.33 (t,  $J = 7.8$  Hz, 2H), 7.04 – 7.09 (m, 3H), 3.83 (s, 3H).  $^{13}\text{C}$  NMR (100 MHz,  $\text{DMSO}-d_6$ )  $\delta$  162.3, 139.8, 130.1, 129.0, 127.4, 123.9, 120.8, 114.1, 55.9.

#### **4-methoxy-*N*-phenylbenzamide (3an)<sup>11</sup>**

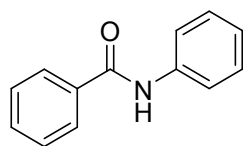

Yield 50%, white solid, mp 161-162 °C. <sup>1</sup>H NMR (400 MHz, CDCl<sub>3</sub>) δ 7.90 (br s, 1H), 7.86 – 7.84 (m, 2H), 7.63 (dd, *J* = 8.6, 1.0 Hz, 2H), 7.55 – 7.51 (m, 1H), 7.48 – 7.44 (m, 2H), 7.37 – 7.33 (m, 2H), 7.16 – 7.12 (m, 1H).

### 3-bromo-*N*-phenylbenzamide (3ao)<sup>11</sup>

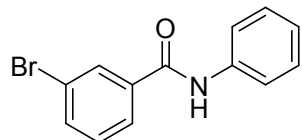

Yield 46%, white solid, mp 141-142 °C. <sup>1</sup>H NMR (400 MHz, CDCl<sub>3</sub>) δ 8.02 (d, *J* = 1.4 Hz, 1H), 7.80 (dd, *J* = 7.8, 0.9 Hz, 1H), 7.75 (br s, 1H), 7.69 (dd, *J* = 8.0, 1.0 Hz, 1H), 7.63 (d, *J* = 8.1 Hz, 2H), 7.41 – 7.36 (m, 3H), 7.18 (t, *J* = 7.4 Hz, 1H).

### 3,4-dimethyl-*N*-phenylbenzamide (3ap)<sup>12</sup>

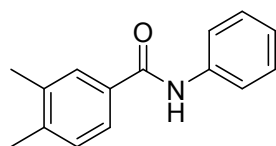

Yield 40%, white solid, mp 103-104 °C. <sup>1</sup>H NMR (400 MHz, CDCl<sub>3</sub>) δ 8.03 (br s, 1H), 7.65 – 7.63 (m, 3H), 7.56 (dd, *J* = 7.8, 1.8 Hz, 1H), 7.33 (t, *J* = 7.9 Hz, 2H), 7.17 (d, *J* = 7.8 Hz, 1H), 7.11 (t, *J* = 7.4 Hz, 1H).

### *N*-(4-chlorophenyl)-2-methylpentanamide (3dd)

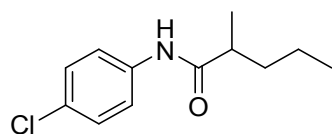

Yield 74%, white solid, mp 106-107 °C. <sup>1</sup>H NMR (400 MHz, CDCl<sub>3</sub>) δ 7.49 (d, *J* = 8.8 Hz, 2H), 7.42 (s, 1H), 7.26 (d, 2H), 2.31 – 2.22 (m, 1H), 1.81 – 1.70 (m, 1H), 1.57 – 1.46 (m, 1H), 1.21 (d, *J* = 6.8 Hz, 2H), 0.95 (t, *J* = 7.4 Hz, 2H). <sup>13</sup>C NMR (100 MHz, CDCl<sub>3</sub>) δ 175.0, 136.6, 129.1, 129.0, 121.1, 42.5, 36.6, 20.7, 17.8, 14.1. Calcd for C<sub>12</sub>H<sub>17</sub>ClNO [M+H]<sup>+</sup>: 226.09932; Found: 226.09869.

### *N*-(4-chlorophenyl)-2-methylbutanamide (3de)

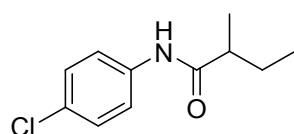

Yield 75%, white solid, mp 119-120 °C. <sup>1</sup>H NMR (400 MHz, CDCl<sub>3</sub>) δ 7.49 (d, *J* = 8.8 Hz, 2H), 7.42 (s, 1H), 7.27 – 7.25 (m, 2H), 2.31 – 2.22 (m, 1H), 1.81 – 1.70 (m, 1H), 1.56 – 1.46 (m, 1H), 1.21 (d, *J* = 6.8 Hz, 3H), 0.95 (t, *J* = 7.4 Hz, 3H). <sup>13</sup>C NMR

(100 MHz, CDCl<sub>3</sub>)  $\delta$  175.0, 136.6, 129.1, 128.9, 121.2, 44.1, 27.4, 17.4, 11.9. Calcd for C<sub>11</sub>H<sub>15</sub>ClNO [M+H]<sup>+</sup>: 212.08367; Found: 212.08330.

***N*-(4-chlorophenyl)-2-methylpropanamide (3df)**

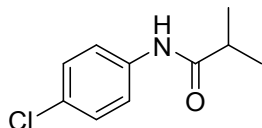

Yield 73%, white solid, mp 155-156 °C. <sup>1</sup>H NMR (400 MHz, CDCl<sub>3</sub>)  $\delta$  7.48 (d, *J* = 8.7 Hz, 2H), 7.33 (s, 1H), 7.28 – 7.26 (m, 2H), 2.50 (hept, *J* = 6.9 Hz, 1H), 1.24 (d, *J* = 6.9 Hz, 6H). <sup>13</sup>C NMR (100 MHz, CDCl<sub>3</sub>)  $\delta$  175.3, 136.6, 129.1, 129.0, 121.1, 36.7, 19.6. Calcd for C<sub>10</sub>H<sub>13</sub>ClNO [M+H]<sup>+</sup>: 198.06802; Found: 198.06779.

***N*-(4-chlorophenyl)propanamide (3dh)<sup>13</sup>**

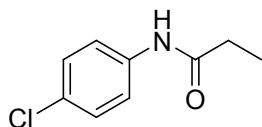

Yield 75%, white solid, mp 138-139 °C. <sup>1</sup>H NMR (400 MHz, CDCl<sub>3</sub>)  $\delta$  7.70 (s, 1H), 7.50 (d, *J* = 8.7 Hz, 2H), 7.29 (t, *J* = 6.1 Hz, 2H), 2.41 (q, *J* = 7.6 Hz, 2H), 1.26 (t, *J* = 7.6 Hz, 3H). <sup>13</sup>C NMR (100 MHz, CDCl<sub>3</sub>)  $\delta$  172.4, 136.6, 129.1, 128.9, 121.2, 30.6, 9.6. Calcd for C<sub>9</sub>H<sub>11</sub>ClNO [M+H]<sup>+</sup>: 184.05237; Found: 184.05212.

***N*-(4-chlorophenyl)cyclohexanecarboxamide (3dj)**

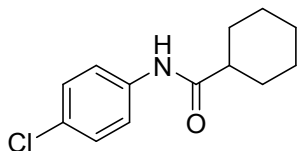

Yield 76%, white solid, mp 190-191 °C. <sup>1</sup>H NMR (400 MHz, CDCl<sub>3</sub>)  $\delta$  7.48 (d, *J* = 8.7 Hz, 2H), 7.32 (s, 1H), 7.27 – 7.25 (m, 2H), 2.22 (tt, *J* = 11.7, 3.4 Hz, 1H), 1.94 (d, *J* = 13.1 Hz, 2H), 1.85 – 1.82 (m, 2H), 1.70 (d, *J* = 9.8 Hz, 1H), 1.58 – 1.48 (m, 2H), 1.34 – 1.22 (m, 3H). <sup>13</sup>C NMR (100 MHz, CDCl<sub>3</sub>)  $\delta$  174.5, 136.7, 129.0, 128.9, 121.0, 46.49, 29.6, 25.6. Calcd for C<sub>13</sub>H<sub>17</sub>ClNO [M+H]<sup>+</sup>: 238.09932; Found: 238.09877.

***N*-(4-chlorophenyl)cyclopropanecarboxamide (3dk)<sup>14</sup>**

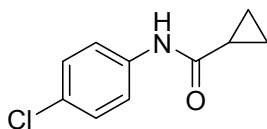



Yield 69%, white solid, mp 170-171 °C. <sup>1</sup>H NMR (400 MHz, CDCl<sub>3</sub>) δ 7.65 (s, 1H), 7.45 (d, *J* = 8.5 Hz, 2H), 7.25 (d, *J* = 9.0 Hz, 2H), 1.53 – 1.47 (m, 1H), 1.09– 1.05 (m, 2H), 0.86 – 0.82 (m, 2H). <sup>13</sup>C NMR (100 MHz, CDCl<sub>3</sub>) δ 172.1, 136.7, 129.0, 121.0, 15.7, 8.1. Calcd for C<sub>10</sub>H<sub>11</sub>ClNO [M+H]<sup>+</sup>: 196.05237; Found: 196.05212.

***N*-(4-chlorophenyl)benzamide (5ad)<sup>10</sup>**

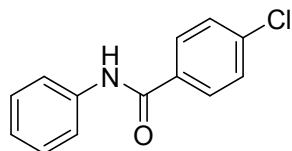

Yield 92%, white solid, mp 197-198 °C. <sup>1</sup>H NMR (400 MHz, DMSO-*d*<sub>6</sub>) δ 10.25 (s, 1H), 7.95 – 7.92 (m, 2H), 7.72 – 7.70 (m, 2H), 7.58 – 7.54 (m, 2H), 7.31 (dd, *J* = 10.8, 5.1 Hz, 2H), 7.06 (t, *J* = 7.4 Hz, 1H). <sup>13</sup>C NMR (100 MHz, DMSO-*d*<sub>6</sub>) δ 164.9, 139.4, 136.8, 134.1, 130.1, 129.1, 128.9, 124.3, 120.9.

***N*-Phenylamide of 3-phenylpropenoic acid (5ae)<sup>15</sup>**

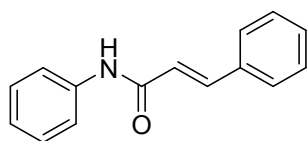

Yield 78%, colorless solid, mp 171–173 °C. <sup>1</sup>H NMR (400 MHz, CDCl<sub>3</sub>) δ 7.95 (s, 1H), 7.73 (d, *J* = 15.5 Hz, 1H), 7.65 (d, *J* = 6.9 Hz, 2H), 7.45 (dd, *J* = 4.9, 2.6 Hz, 2H), 7.33 – 7.29 (m, 5H), 7.11 (t, *J* = 7.4 Hz, 1H), 6.62 (dd, *J* = 15.5, 3.0 Hz, 1H). <sup>13</sup>C NMR (100 MHz, CDCl<sub>3</sub>) δ 164.4, 142.3, 138.1, 134.6, 129.9, 129.1, 128.9, 128.0, 124.5, 121.0, 120.2. Calcd for C<sub>15</sub>H<sub>14</sub>NO [M+H]<sup>+</sup> 224.10699, Found 224.10705.

***N*-(3,4-dichlorophenyl)-2-ethylbutanamide (7aa)**

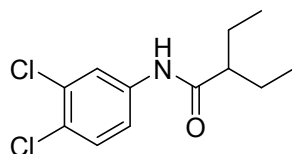

Yield 69%, white solid, mp 96-97 °C. <sup>1</sup>H NMR (48600 MHz, CDCl<sub>3</sub>) δ 7.81 (s, 1H), 7.36 (s, 2H), 7.25 (s, 1H), 2.05 – 2.00 (m, 1H), 1.75 – 1.65 (m, 2H), 1.62 – 1.52 (m, 2H), 0.95 (t, *J* = 7.4 Hz, 6H). <sup>13</sup>C NMR (100 MHz, CDCl<sub>3</sub>) δ 174.4, 137.3, 132.8, 130.5, 127.4, 121.6, 119.0, 52.4, 25.8, 12.1. Calcd for C<sub>12</sub>H<sub>16</sub>Cl<sub>2</sub>NO [M+H]<sup>+</sup>: 260.06035; Found: 260.05994.

## References

- [1] Shi, Feng; *Tetrahedron Lett.* **2010**, 51(46), 6049-6051
- [2] Cason, James; *J. Am. Chem. Soc.* **1951**, 73, 1354-1355
- [3] Li, Min; *Chem. Eur. J.* **2011**, 17(9), 2763-2768
- [4] Allen, C. Liana; *Org. Lett.* **2010**, 12(22), 5096-5099
- [5] Singh, Kamaljit; *Tetrahedron* **2009**, 65(50), 10395-10399
- [6] Peng, Yiyuan; *Chin. J. Chem.* **2009**, 27(7), 1339-1344
- [7] Wang, Ye; *Angew. Chem. Int. Ed.* **2011**, 50(38), 8917-8921
- [8] Yang, Yong-Hua; *J. Org. Chem.* **2005**, 70(21), 8645-8648
- [9] Han, Ki-Jong; *Org. Prep. Proced. Int.* **2005**, 37(2), 198-203
- [10] Zhang, Lijun; *Tetrahedron* **2009**, 65(48), 10022-10024
- [11] Ali, Md. Ashif; *Synthesis* **2010**, (6), 908-910
- [12] Kissane, Marie; *Org. Biomol. Chem.* **2010**, 8(24), 5602-5613
- [13] Phillips, Dean P.; *Tetrahedron Lett.* **2009**, 50(52), 7293-7296
- [14] Augustine, John Kallikat; *Tetrahedron Lett.* **2011**, 52(10), 1074-1077
- [15] Ueda, Satoshi; *Chem. Commun.* **2010**, 46(14), 2462-2464

## 6. Copies of NMR spectra of some compounds

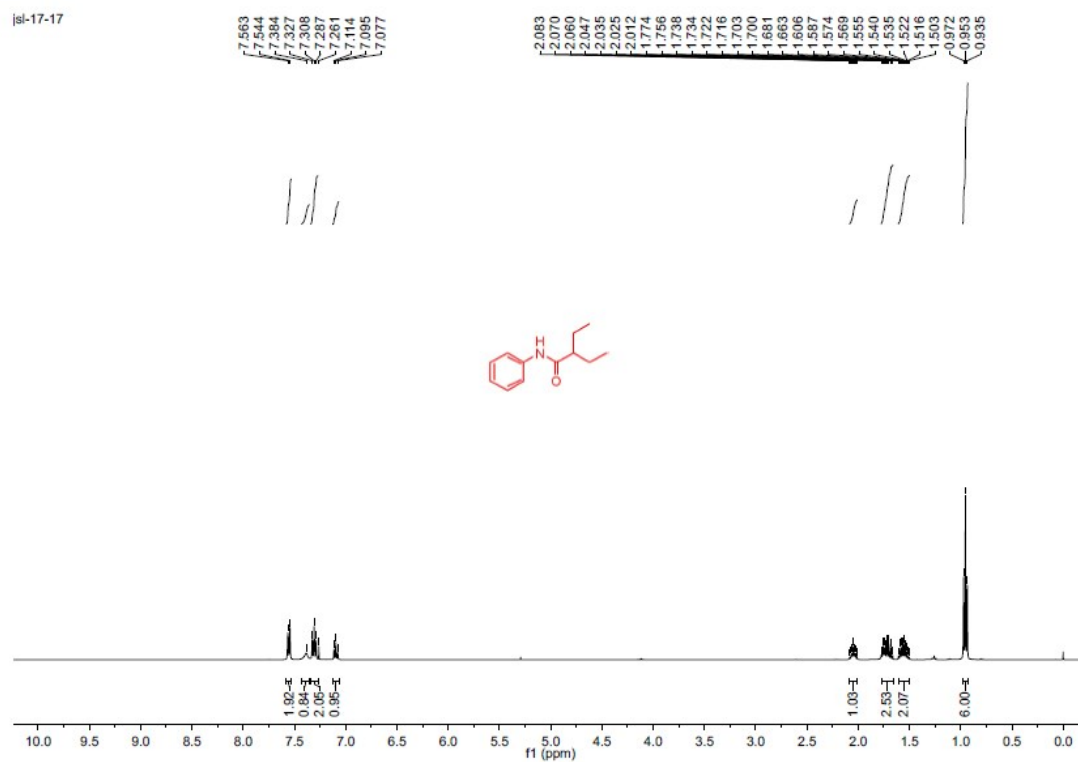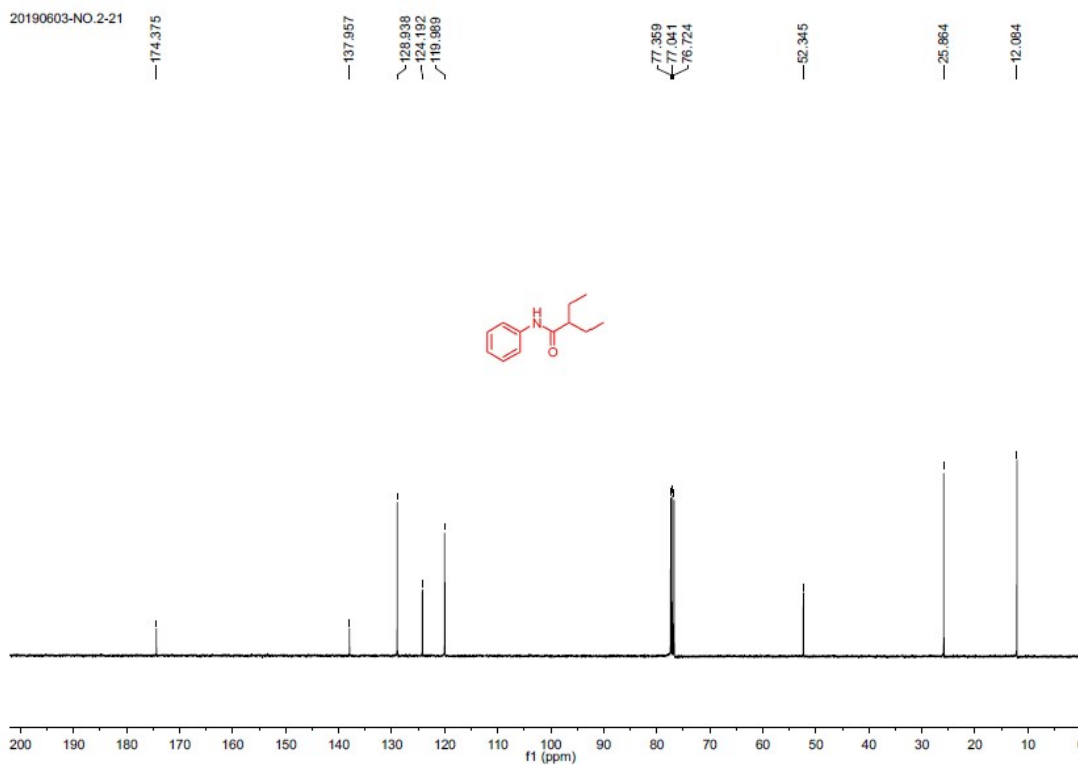

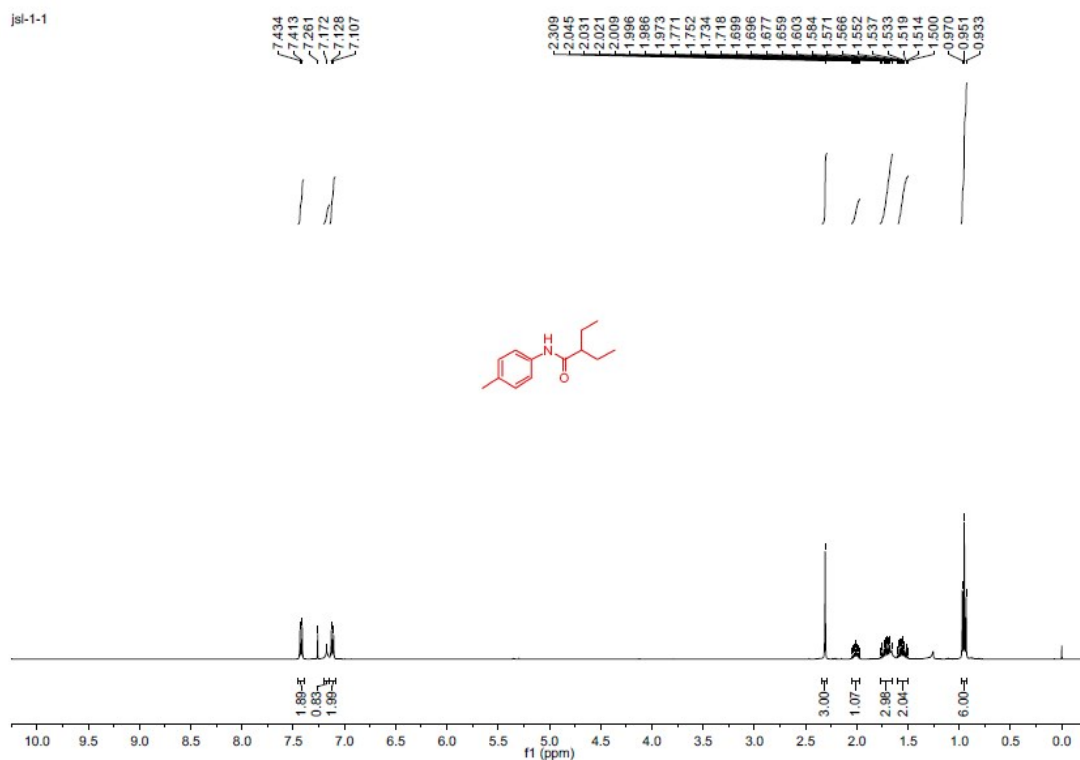

Figure S-6  $^1\text{H}$  NMR spectrum of **3ba** ( $\text{CDCl}_3$ )

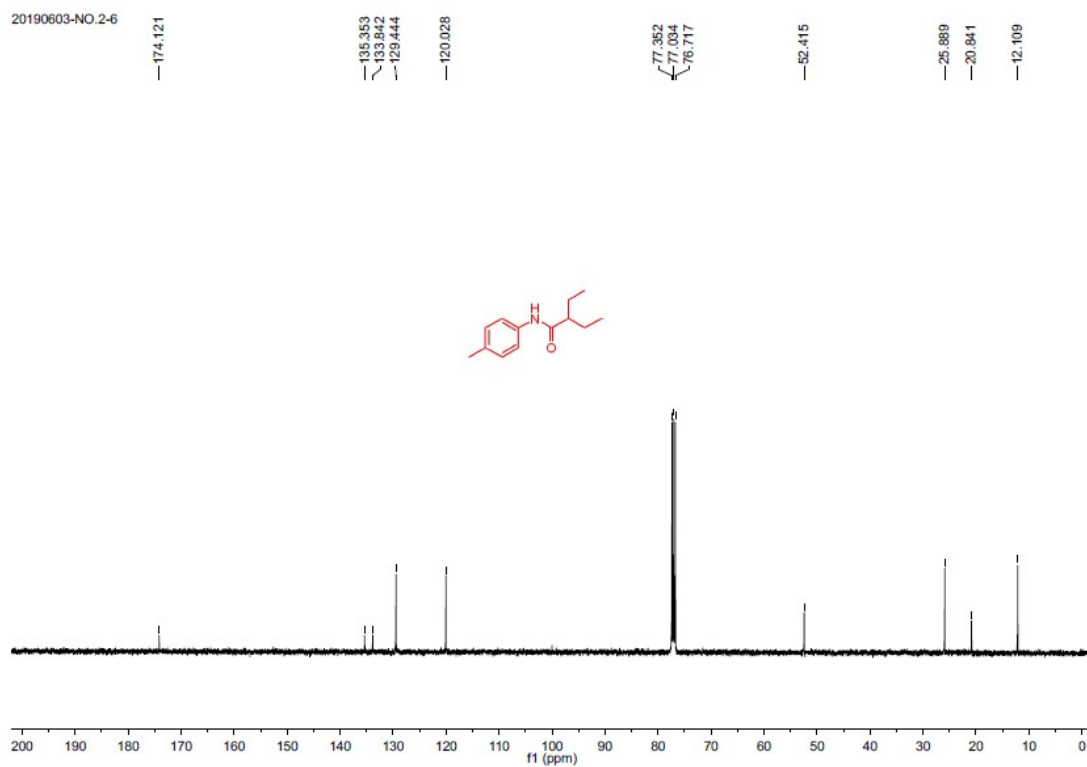

Figure S-7  $^{13}\text{C}$  NMR spectrum of **3ba** ( $\text{CDCl}_3$ )

jsl-12-12

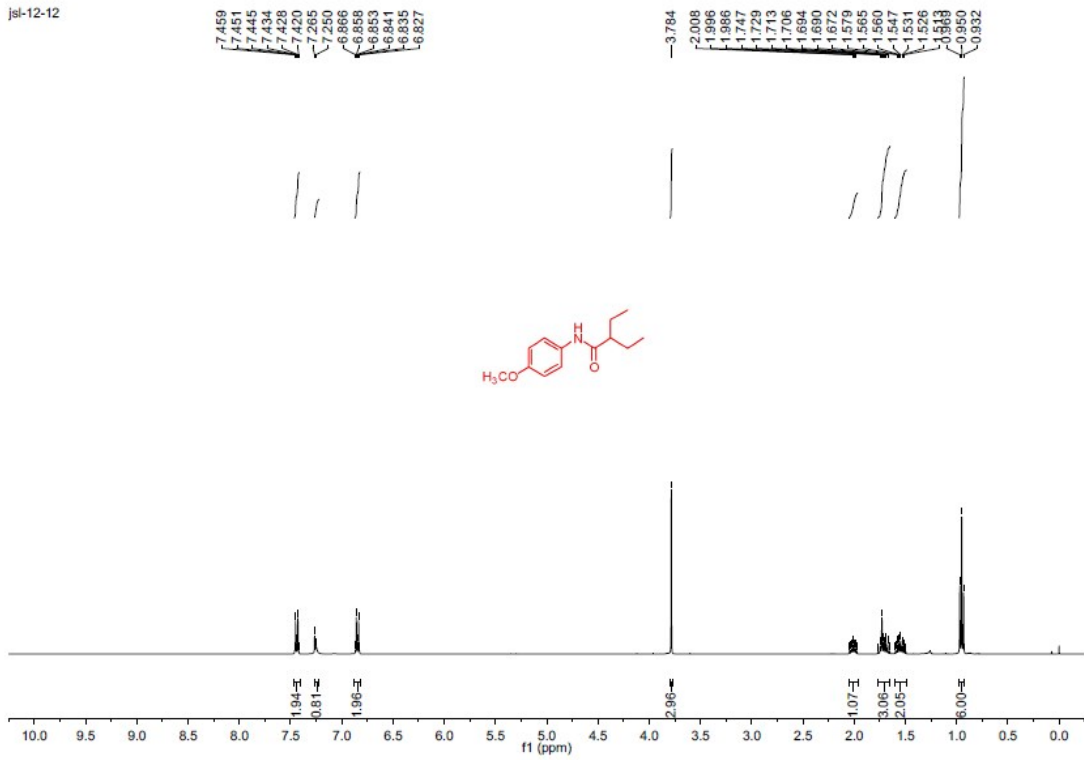

Figure S-8 <sup>1</sup>H NMR spectrum of **3ca** (CDCl<sub>3</sub>)

20190603-NO.2-16

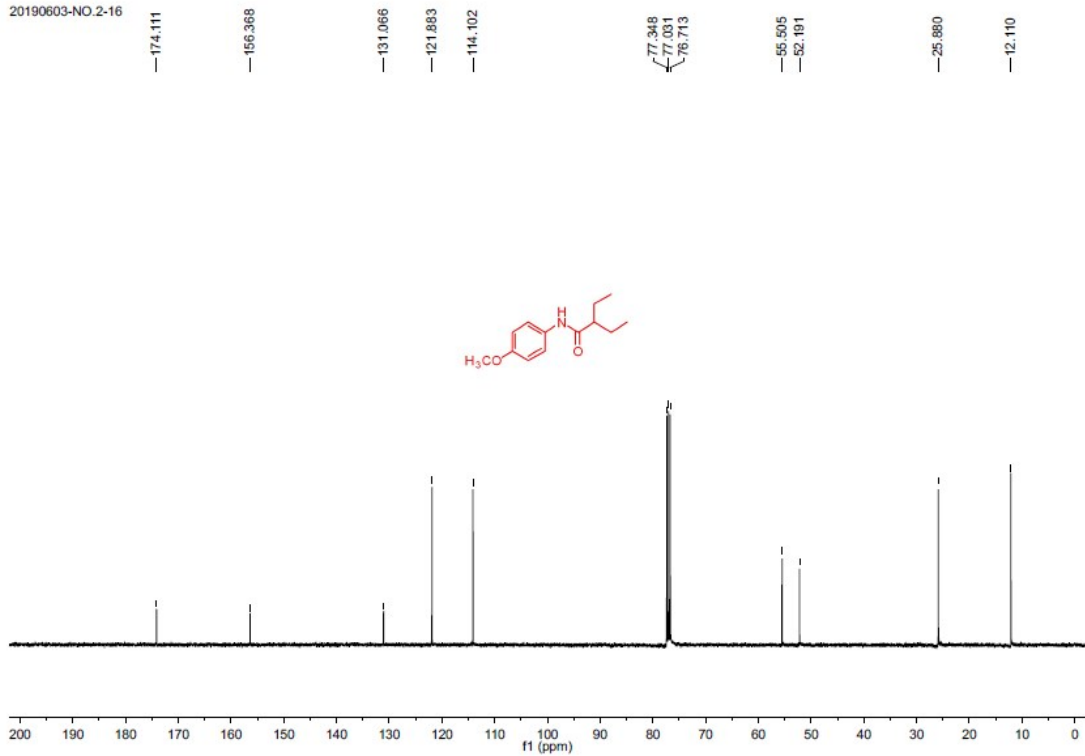

Figure S-9 <sup>13</sup>C NMR spectrum of **3ca** (CDCl<sub>3</sub>)

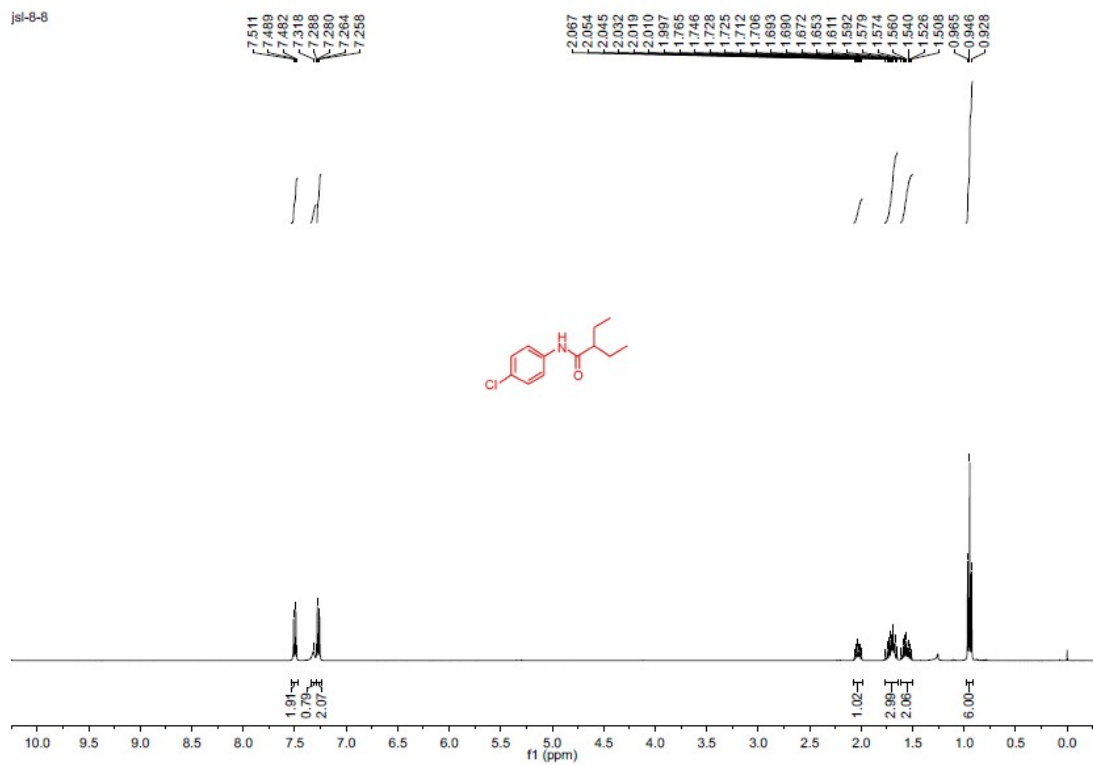

Figure S-10  $^1\text{H}$  NMR spectrum of **3da** ( $\text{CDCl}_3$ )

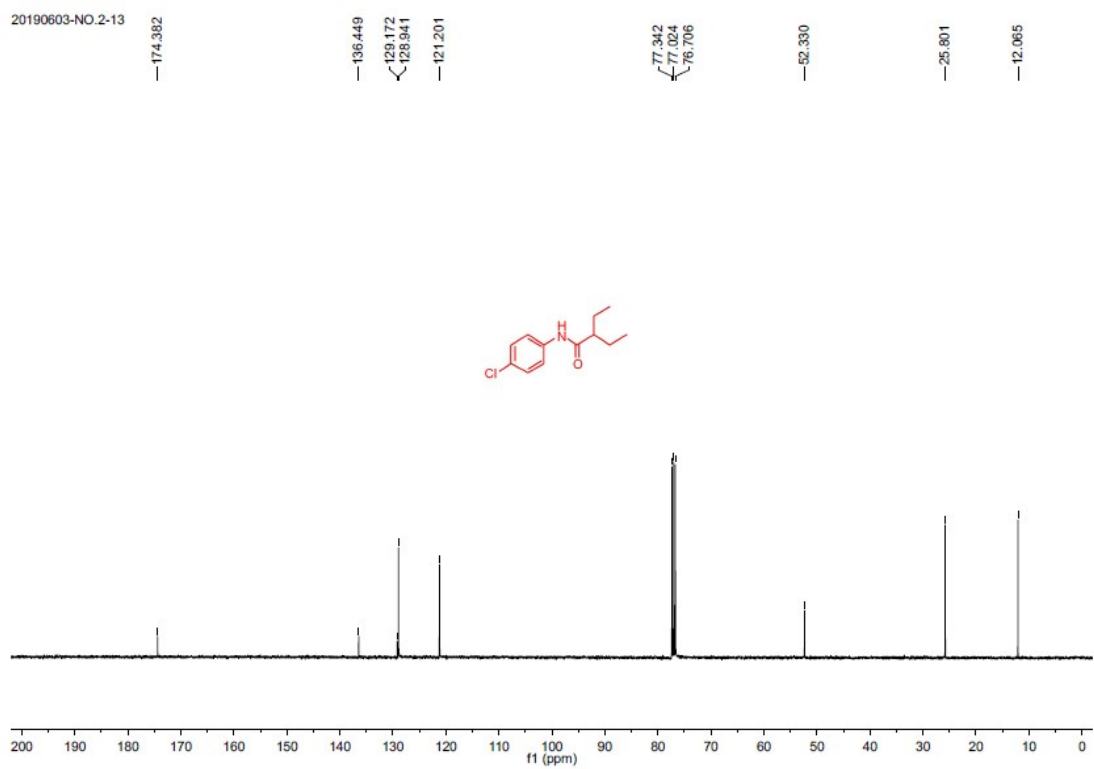

Figure S-11  $^{13}\text{C}$  NMR spectrum of **3da** ( $\text{CDCl}_3$ )

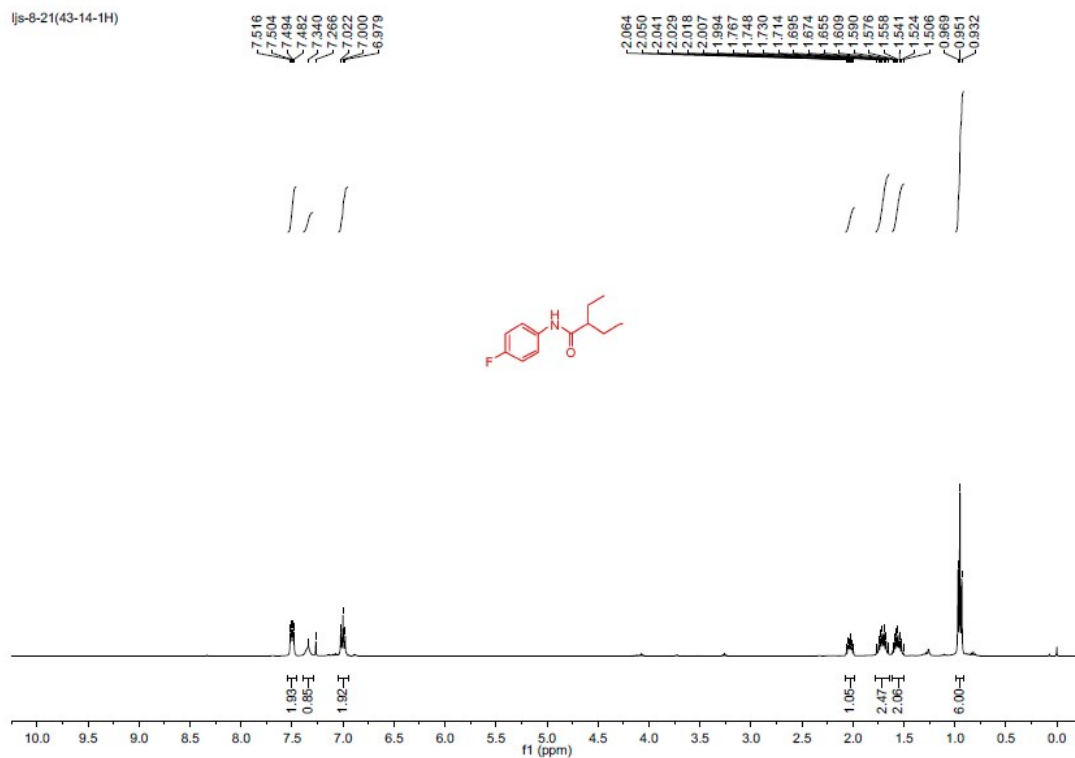

Figure S-12  $^1\text{H}$  NMR spectrum of **3ea** ( $\text{CDCl}_3$ )

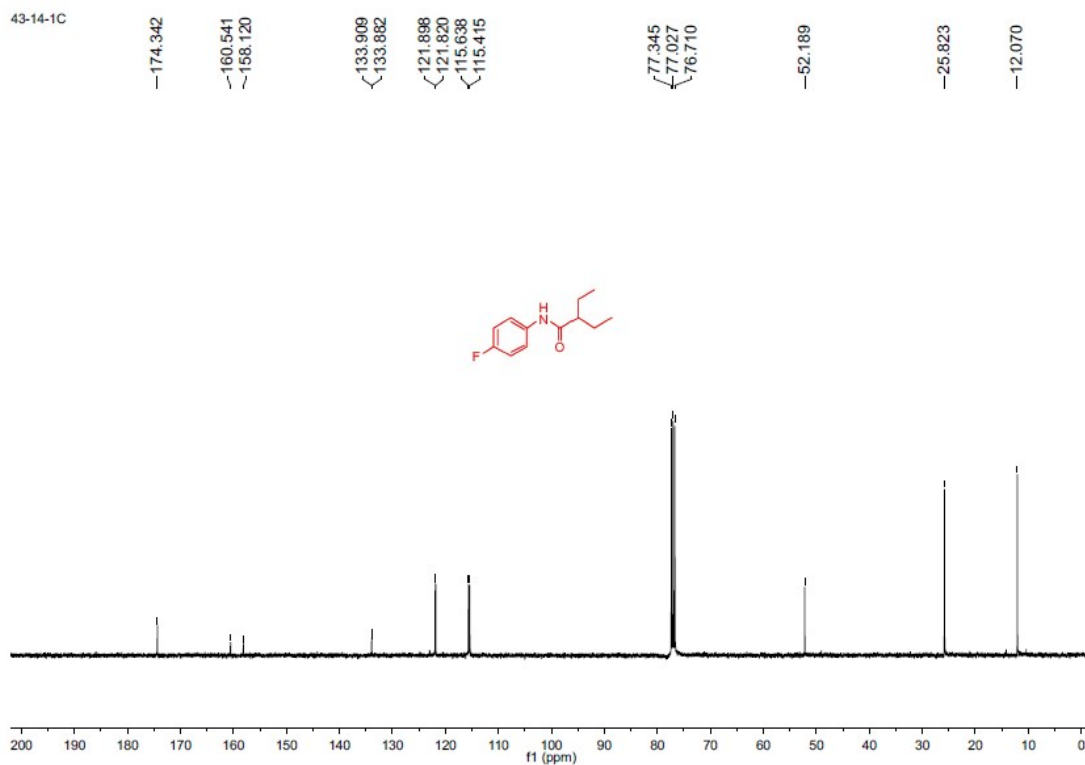

Figure S-13  $^{13}\text{C}$  NMR spectrum of **3ea** ( $\text{CDCl}_3$ )

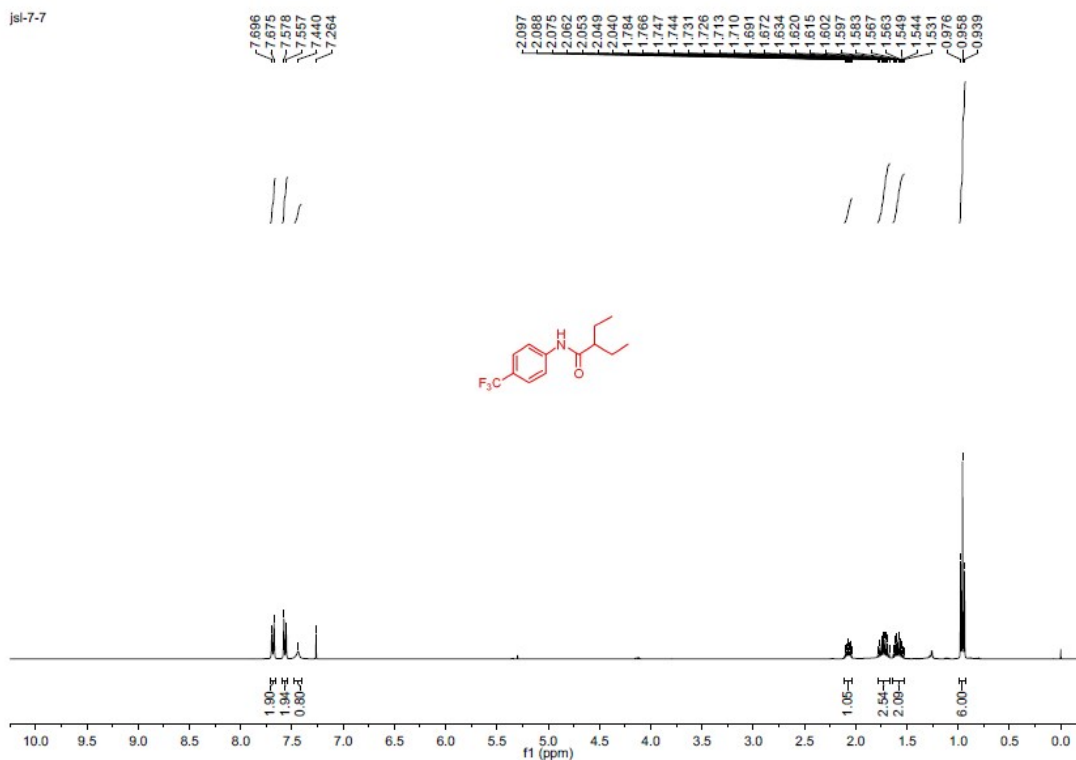

Figure S-14  $^1\text{H}$  NMR spectrum of **3fa** ( $\text{CDCl}_3$ )

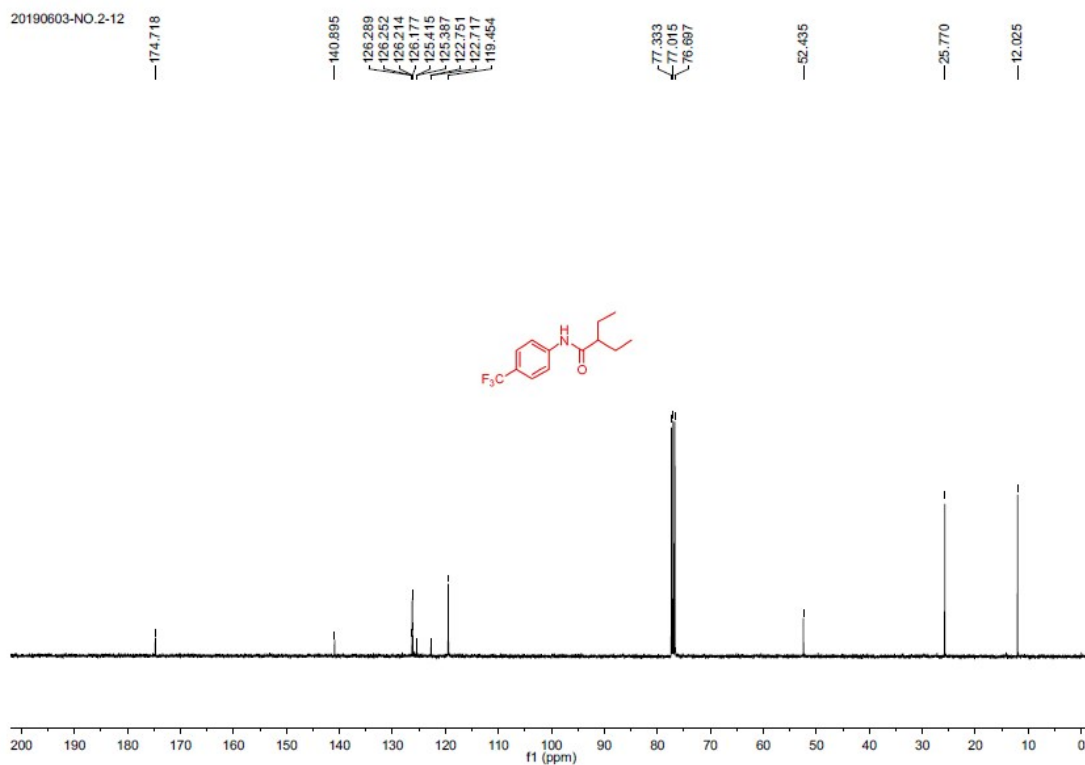

Figure S-15  $^{13}\text{C}$  NMR spectrum of **3fa** ( $\text{CDCl}_3$ )



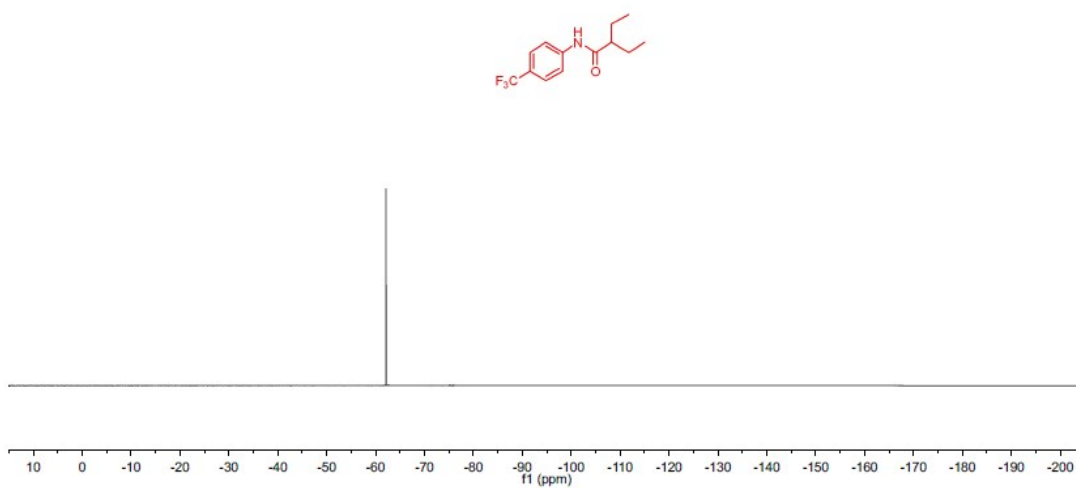

Figure S-16  $^{19}\text{F}$  NMR spectrum of **3fa** ( $\text{CDCl}_3$ )

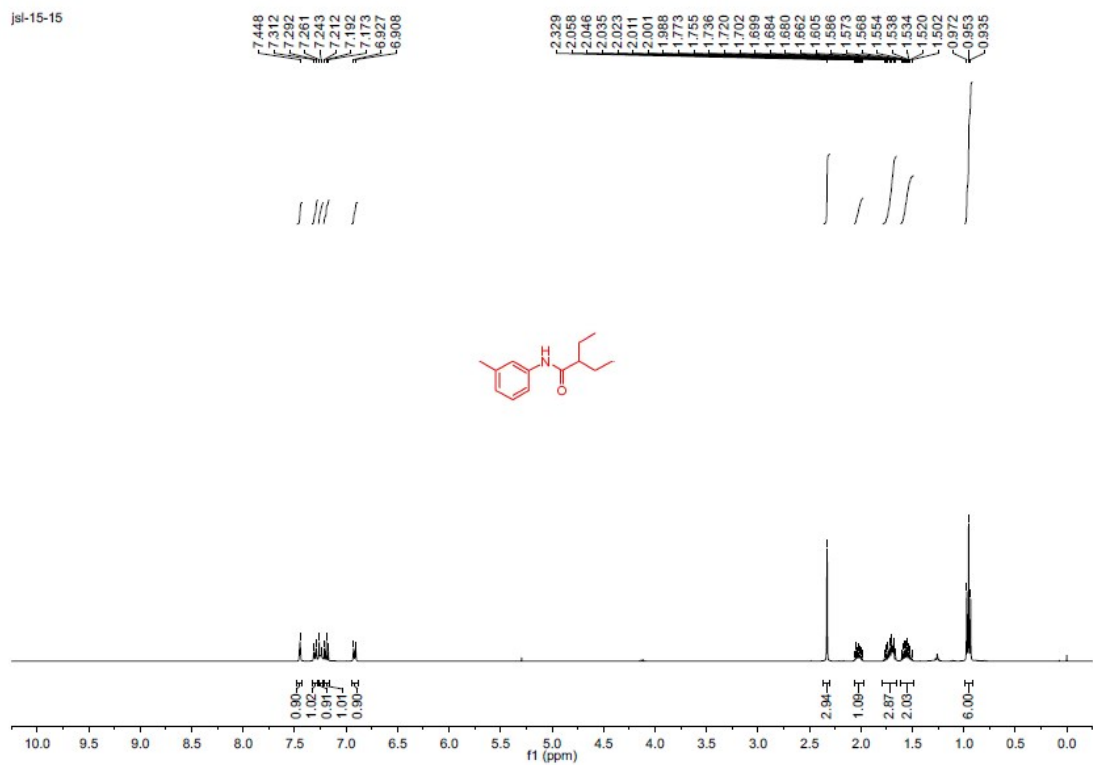

Figure S-17 <sup>1</sup>H NMR spectrum of **3ga** (CDCl<sub>3</sub>)

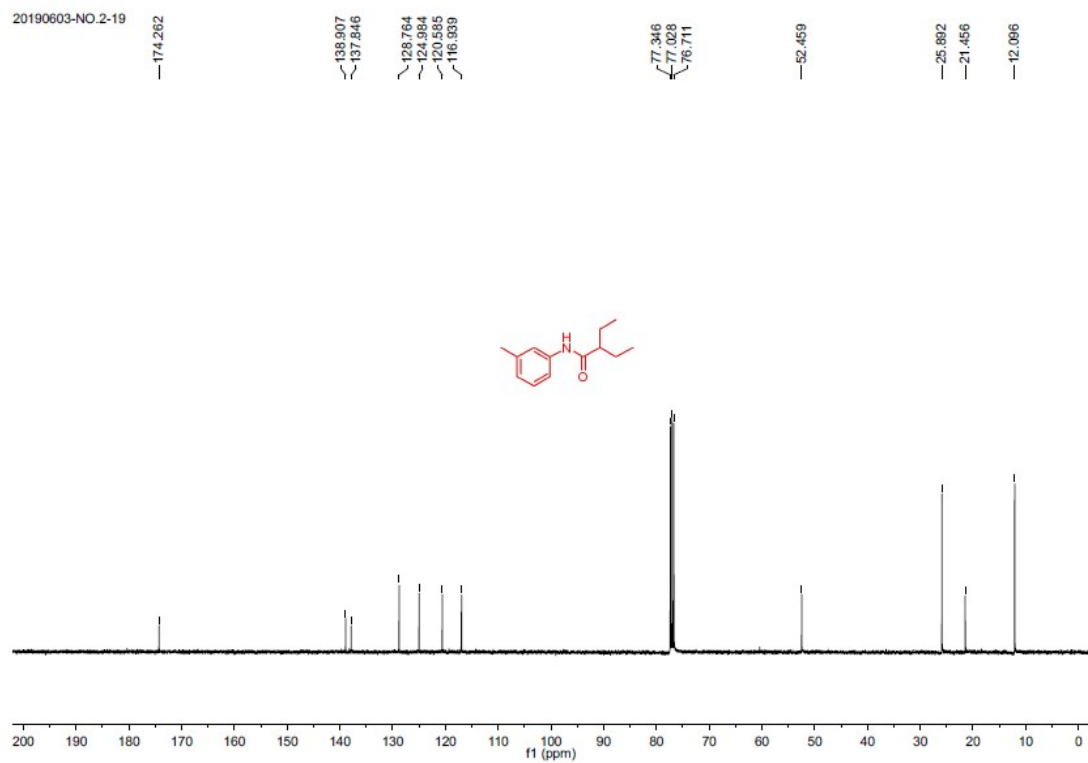

Figure S-18 <sup>13</sup>C NMR spectrum of **3ga** (CDCl<sub>3</sub>)

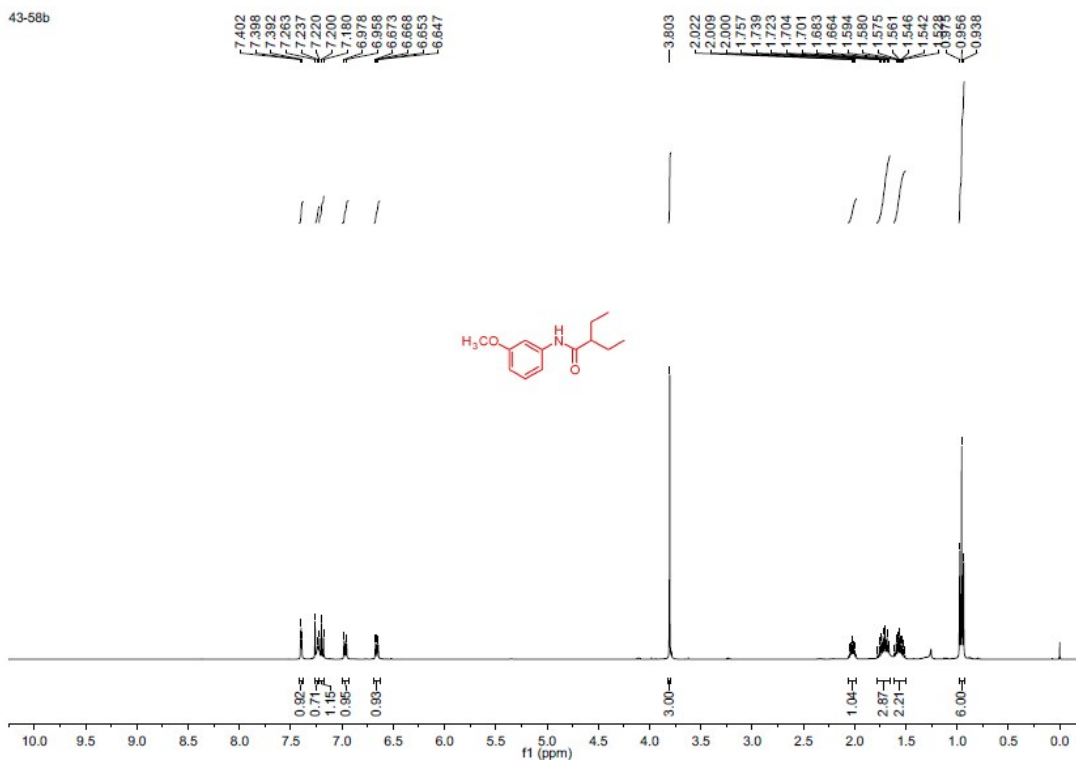

Figure S-19 <sup>1</sup>H NMR spectrum of **3ha** (CDCl<sub>3</sub>)

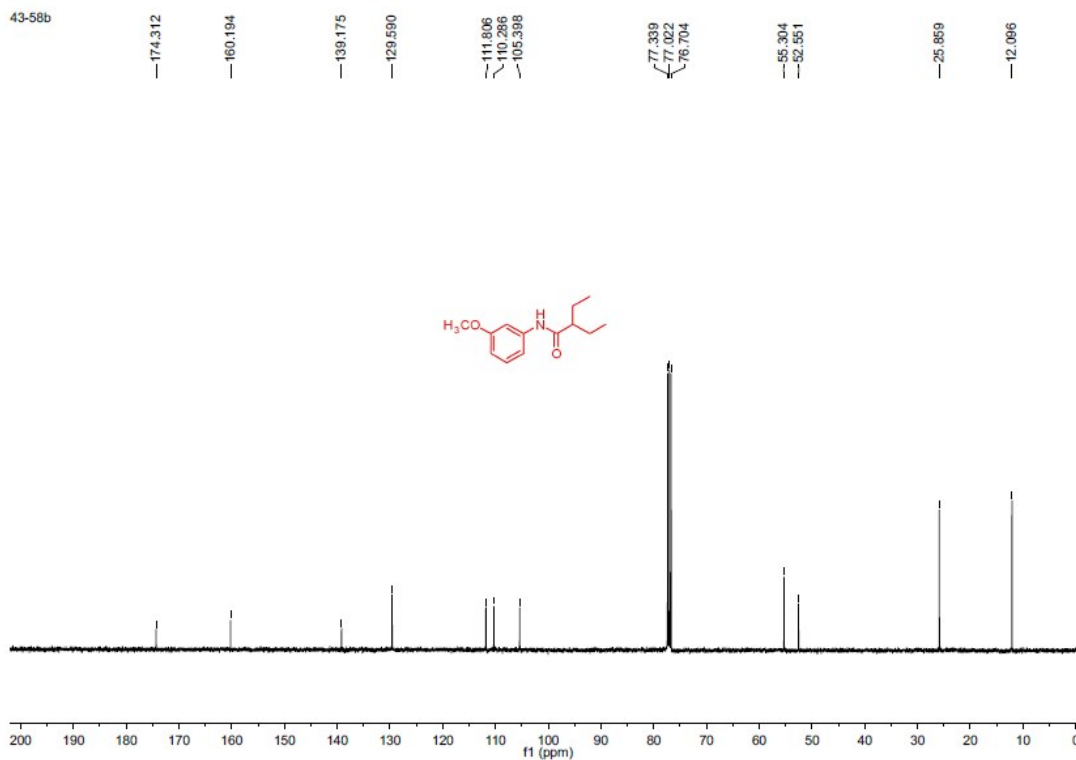

Figure S-20 <sup>13</sup>C NMR spectrum of **3ha** (CDCl<sub>3</sub>)

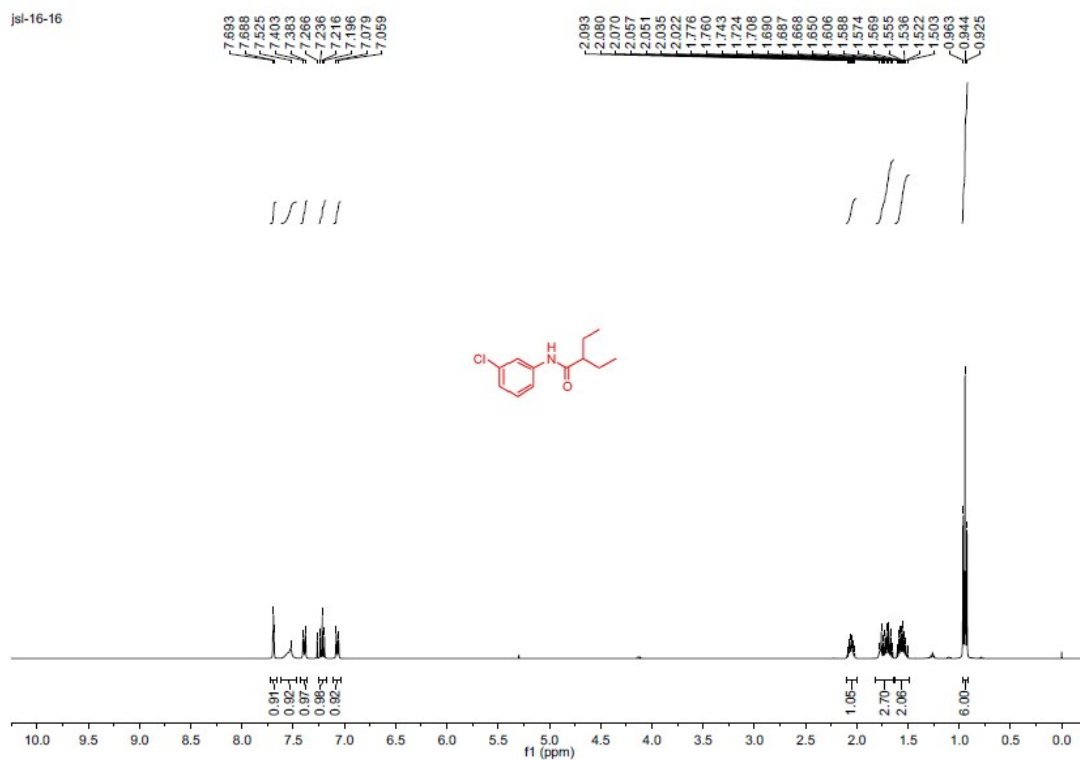

Figure S-21  $^1\text{H}$  NMR spectrum of **3ia** ( $\text{CDCl}_3$ )

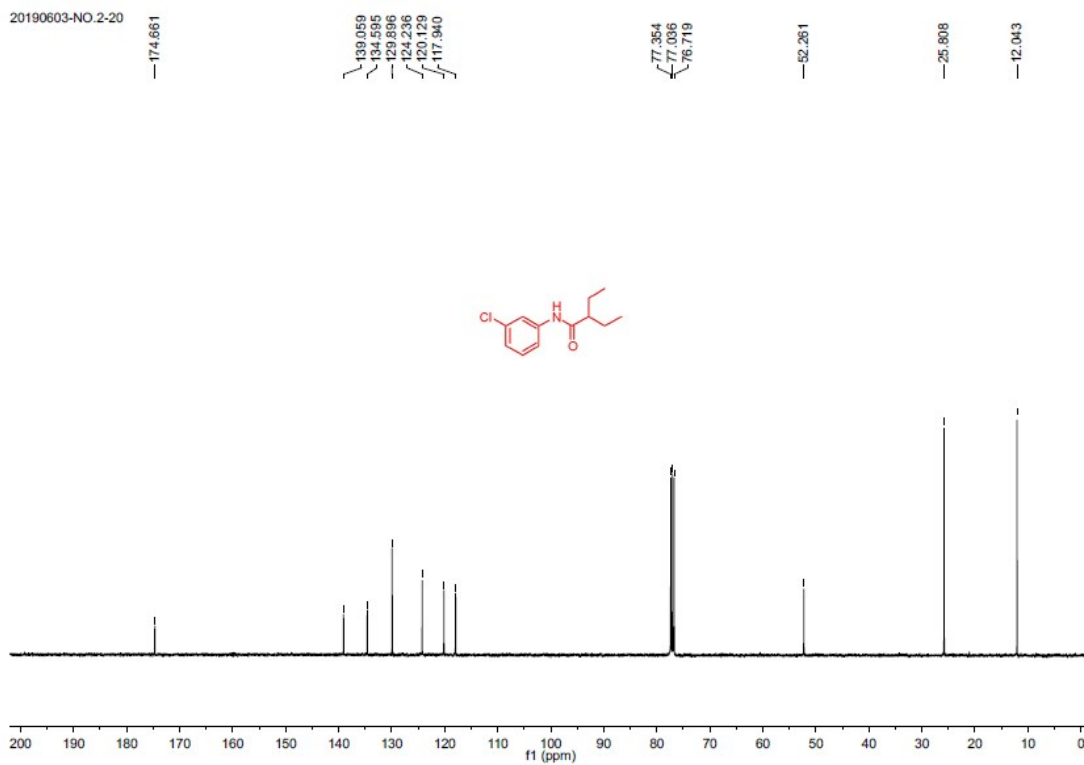

Figure S-22  $^{13}\text{C}$  NMR spectrum of **3ia** ( $\text{CDCl}_3$ )

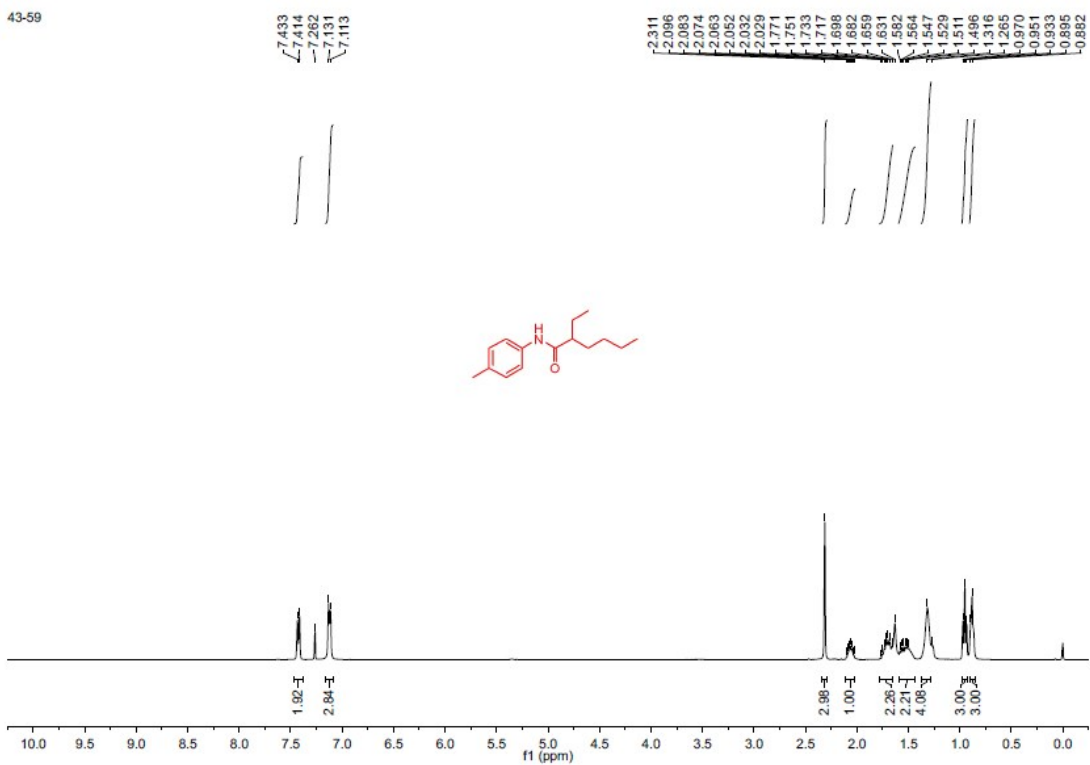

Figure S-23 <sup>1</sup>H NMR spectrum of **3bb** (CDCl<sub>3</sub>)

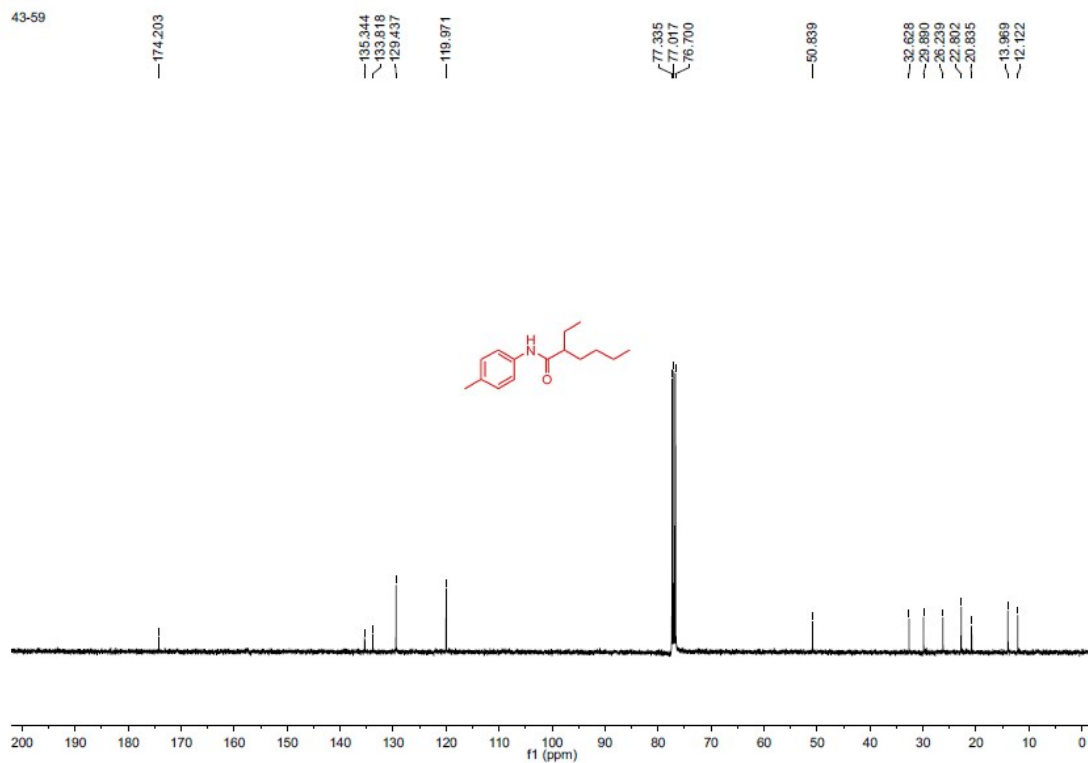

Figure S-24 <sup>13</sup>C NMR spectrum of **3bb** (CDCl<sub>3</sub>)

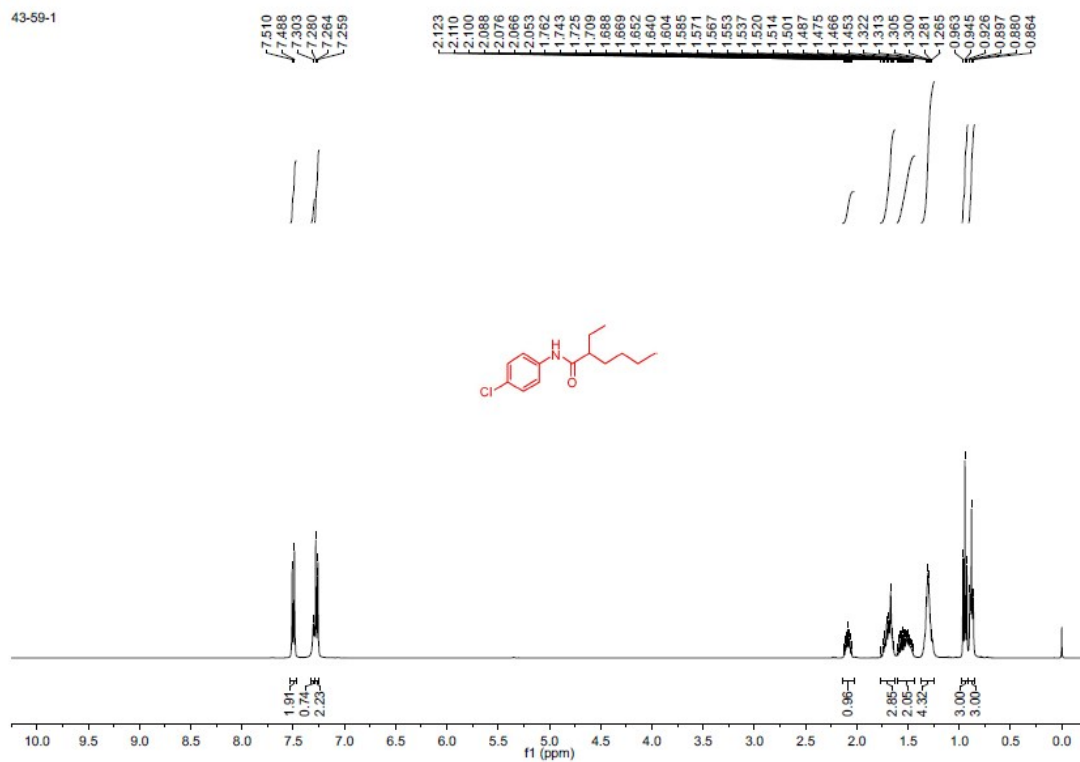

Figure S-25  $^1\text{H}$  NMR spectrum of **3db** ( $\text{CDCl}_3$ )

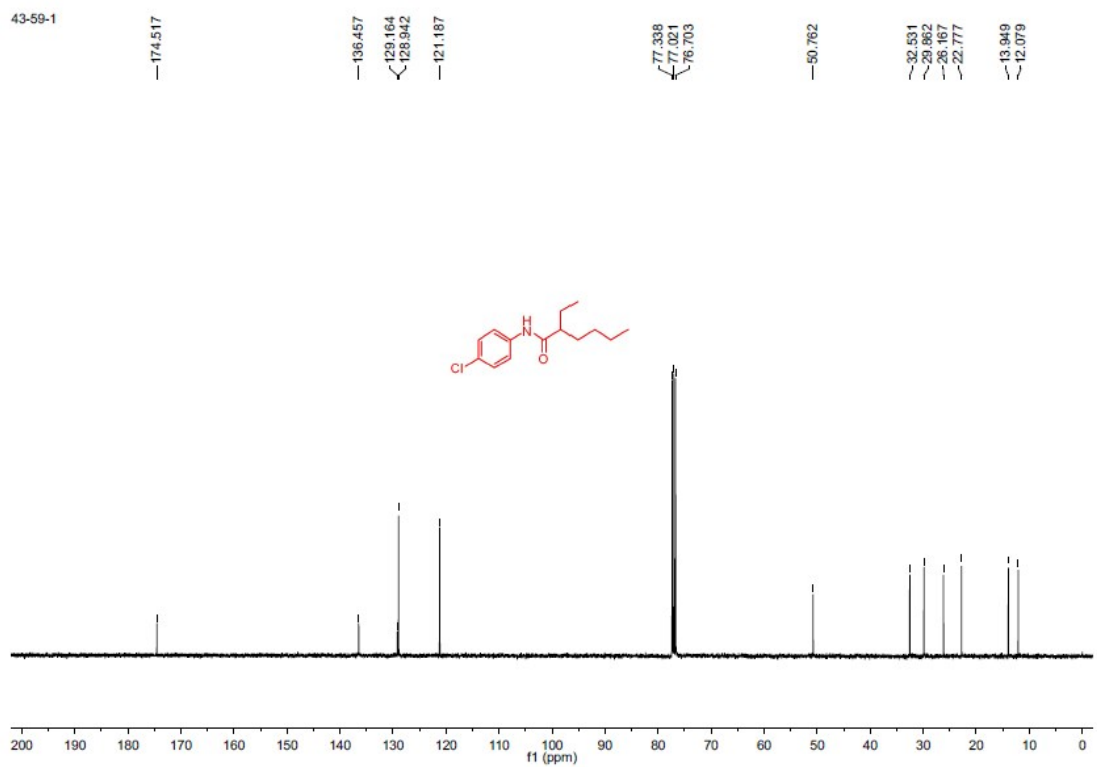

Figure S-26  $^{13}\text{C}$  NMR spectrum of **3db** ( $\text{CDCl}_3$ )

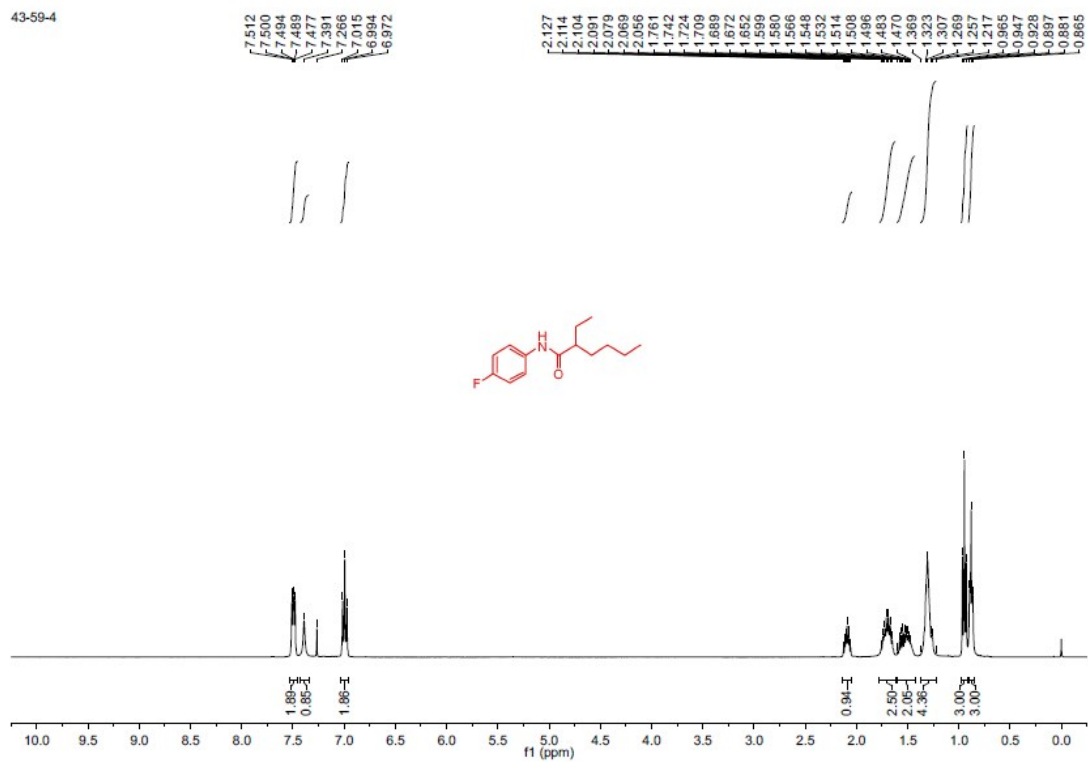

Figure S-27  $^1\text{H}$  NMR spectrum of **3eb** ( $\text{CDCl}_3$ )

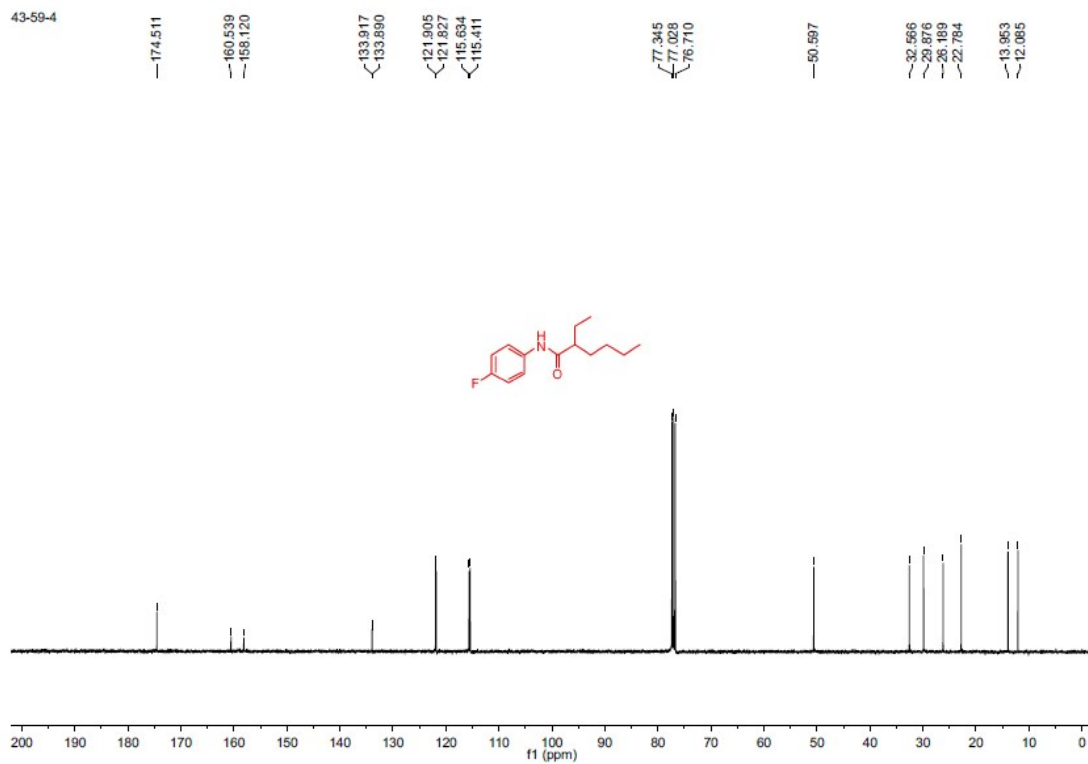

Figure S-28  $^{13}\text{C}$  NMR spectrum of **3eb** ( $\text{CDCl}_3$ )

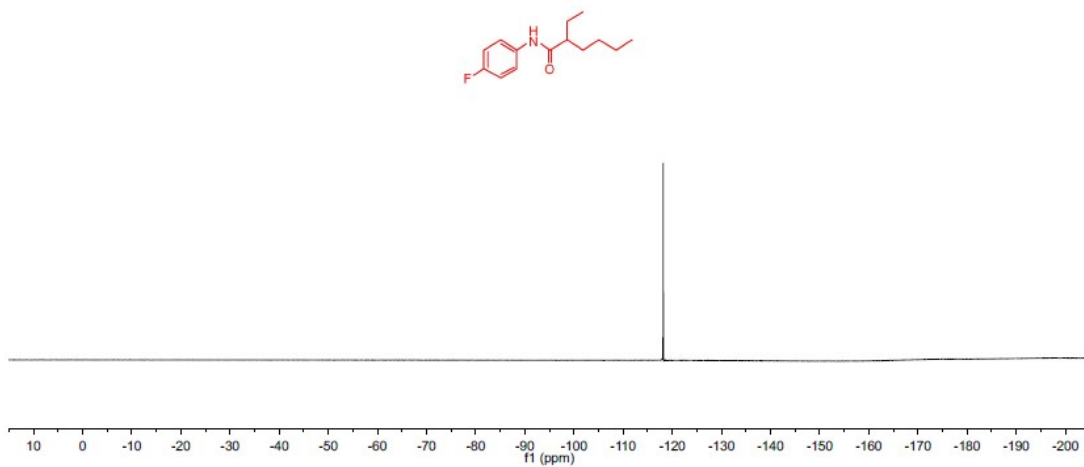Figure S-29  $^{19}\text{F}$  NMR spectrum of **3eb** ( $\text{CDCl}_3$ )



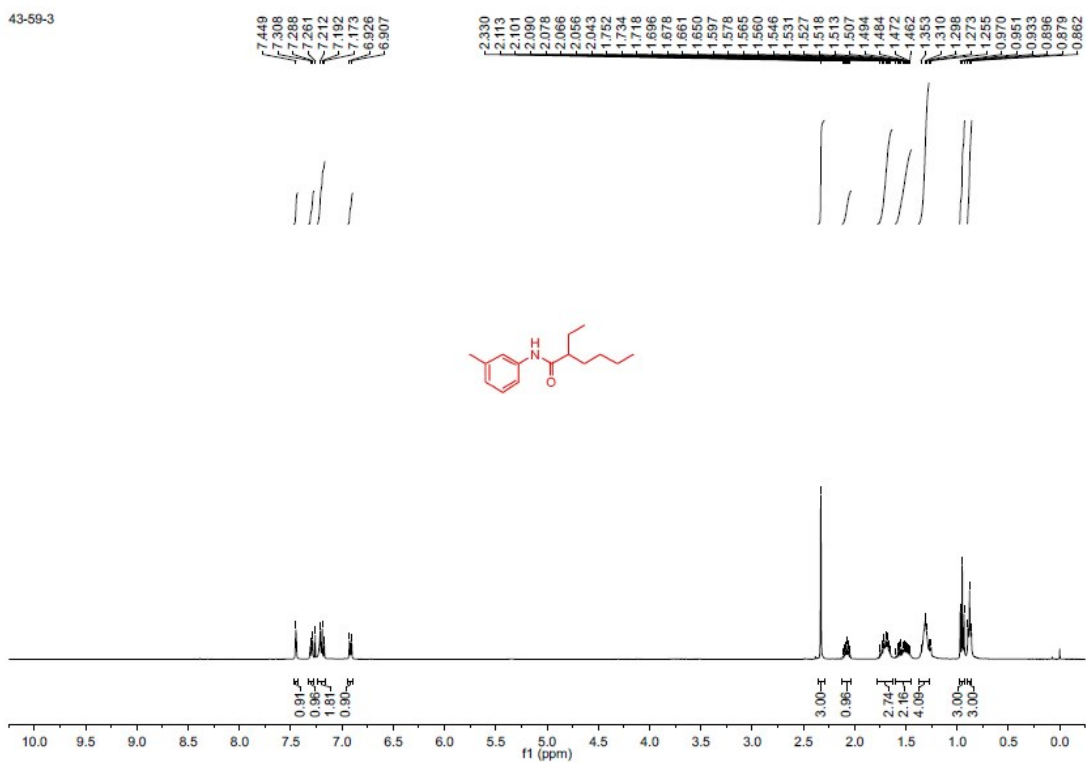

Figure S-30 <sup>1</sup>H NMR spectrum of **3gb** (CDCl<sub>3</sub>)

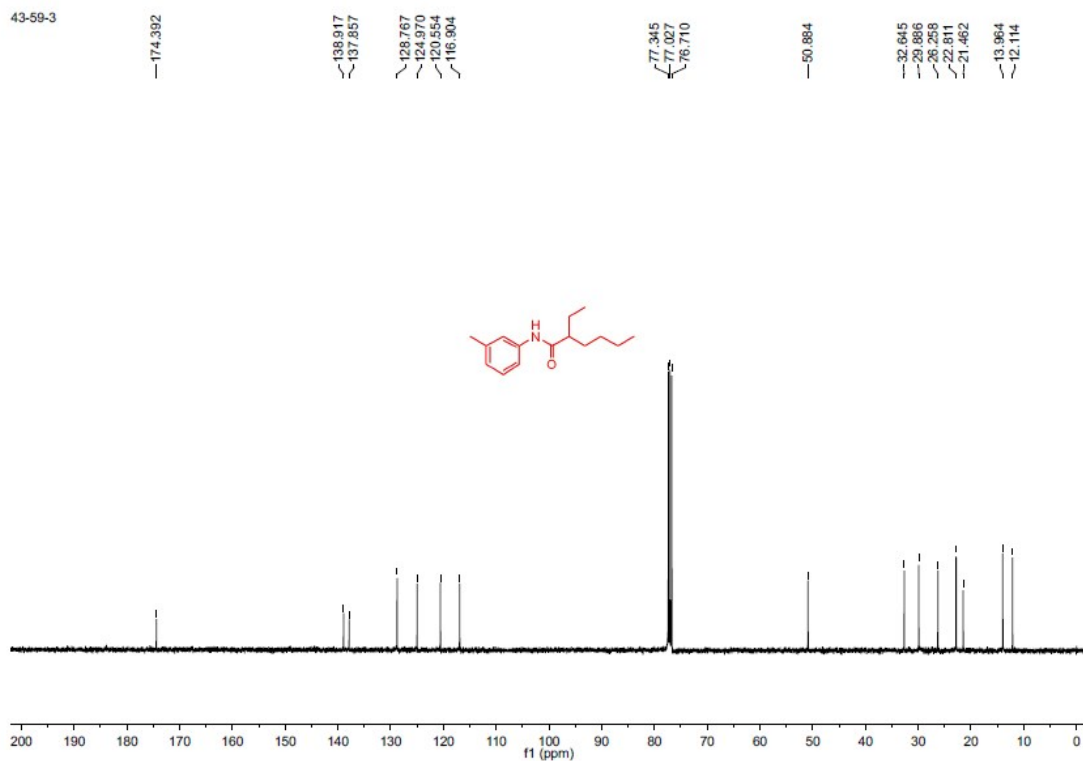

Figure S-31 <sup>13</sup>C NMR spectrum of **3gb** (CDCl<sub>3</sub>)

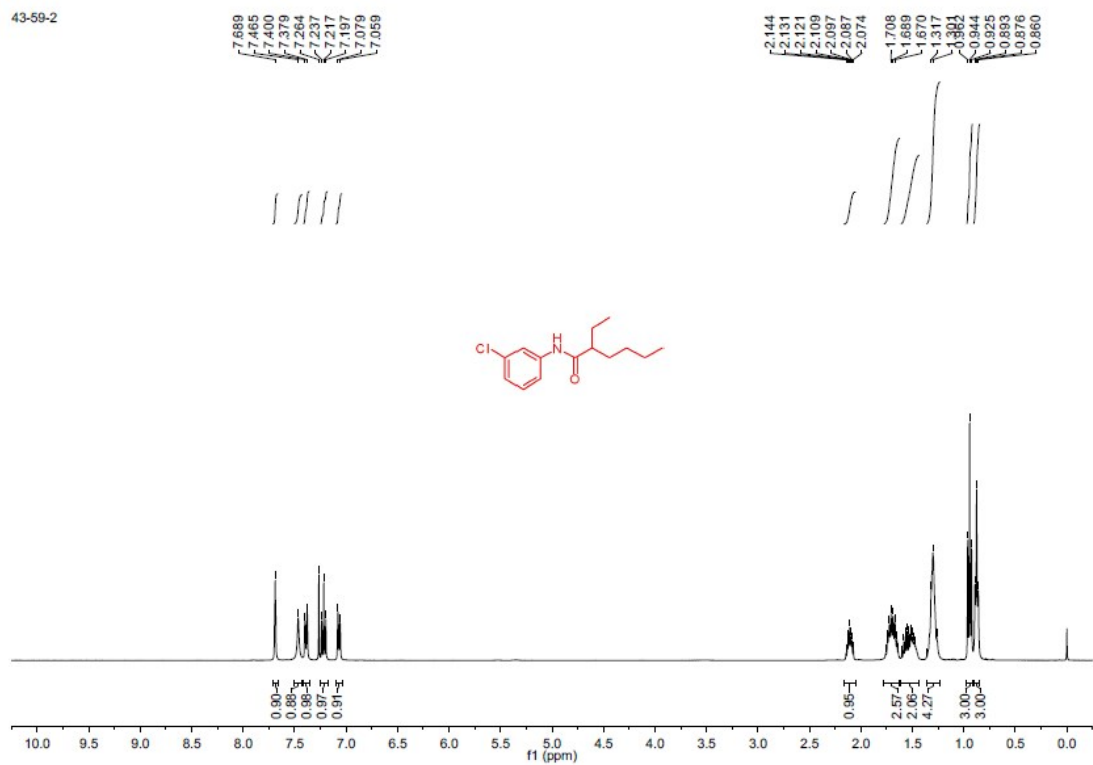

Figure S-32  $^1\text{H}$  NMR spectrum of **3ib** ( $\text{CDCl}_3$ )

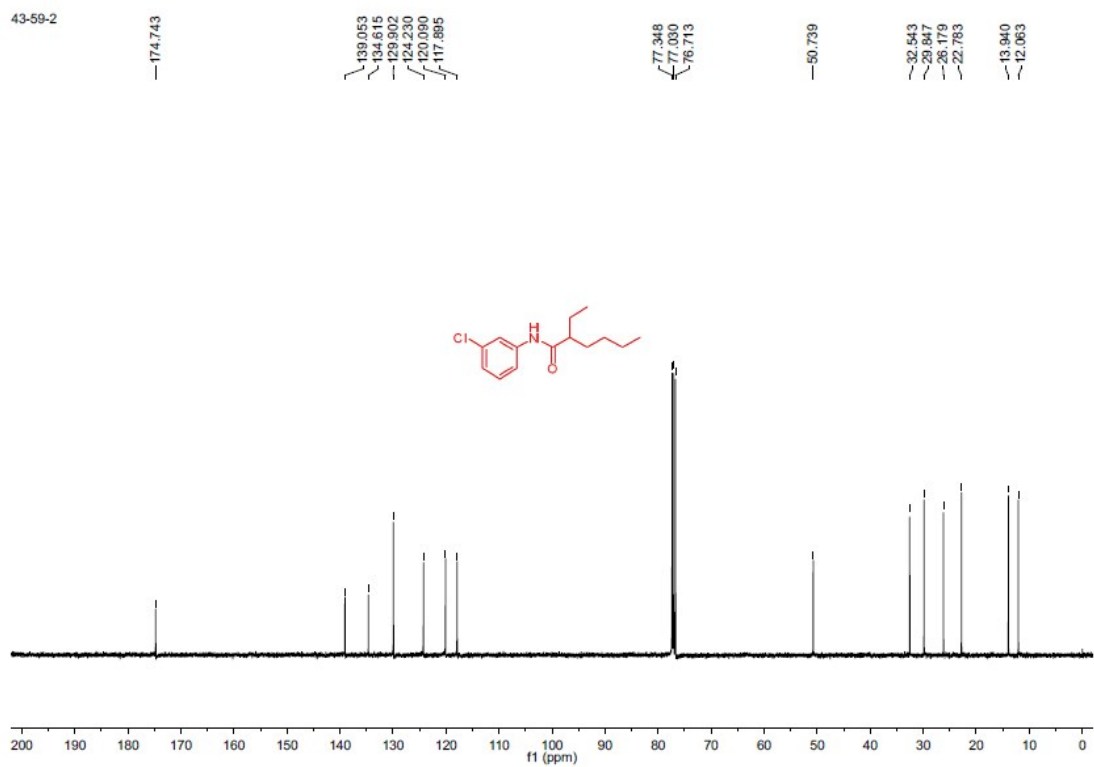

Figure S-33  $^{13}\text{C}$  NMR spectrum of **3ib** ( $\text{CDCl}_3$ )

jsl-6-6

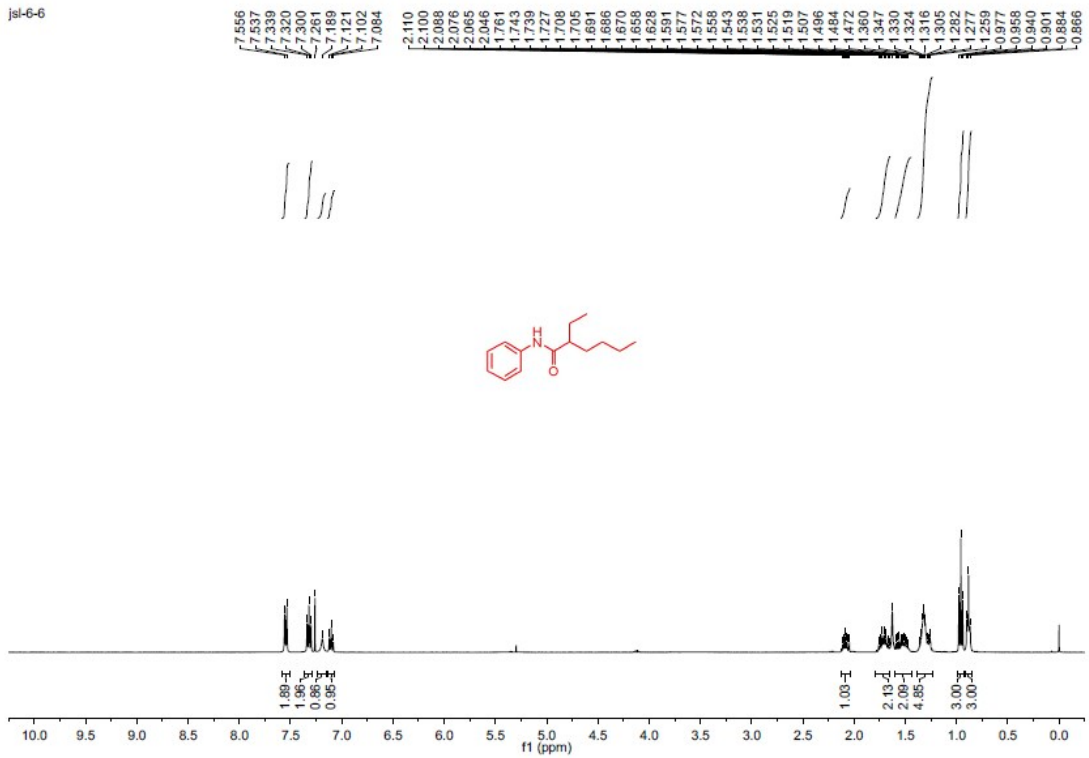

Figure S-34 <sup>1</sup>H NMR spectrum of **3ab** (CDCl<sub>3</sub>)

20190603-NO.2-11

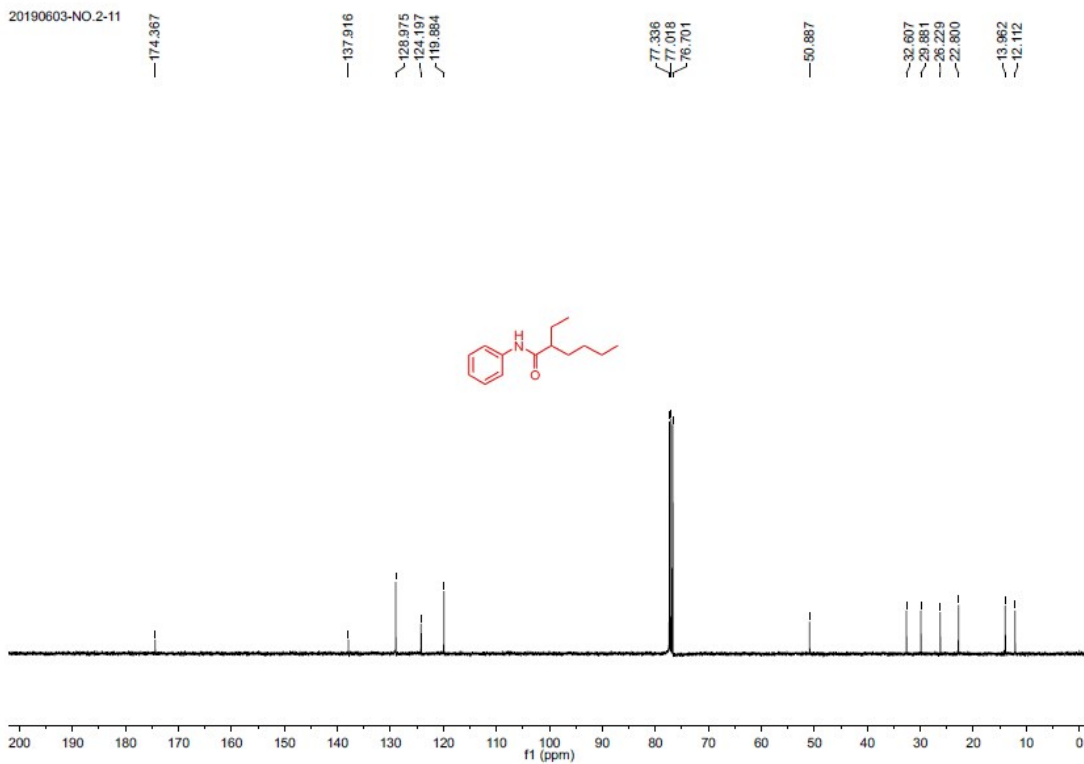

Figure S-35 <sup>13</sup>C NMR spectrum of **3ab** (CDCl<sub>3</sub>)

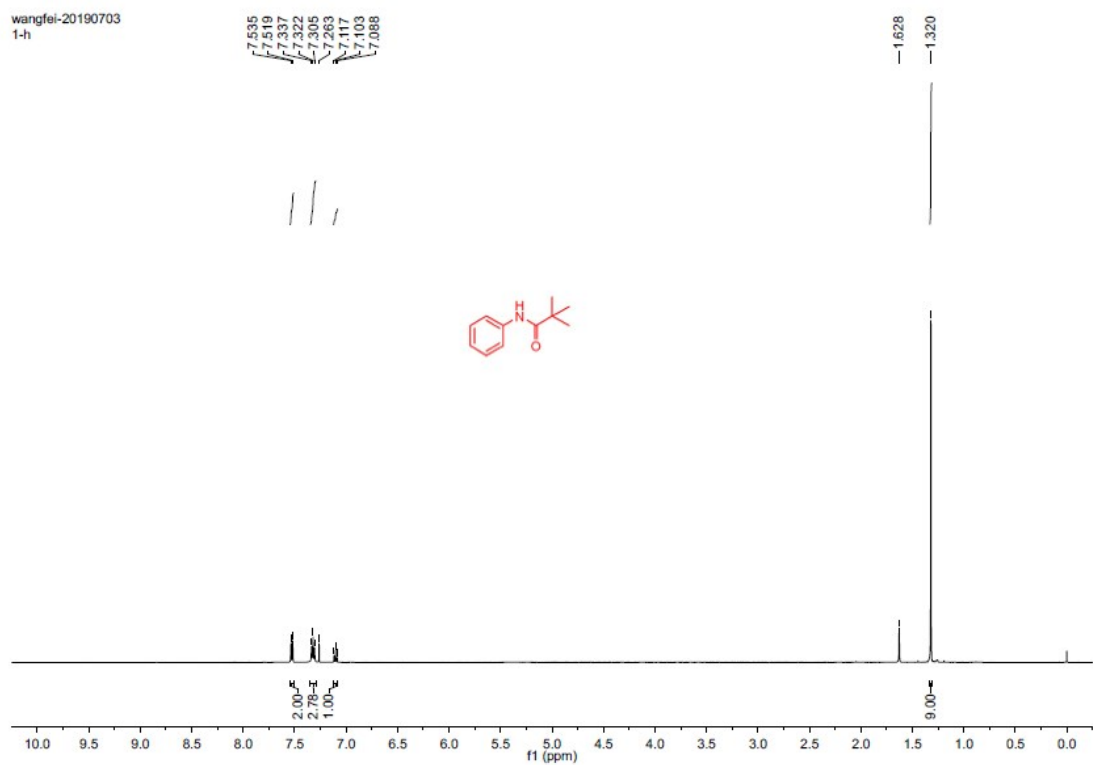

Figure S-36  $^1\text{H}$  NMR spectrum of **3ac** ( $\text{CDCl}_3$ )

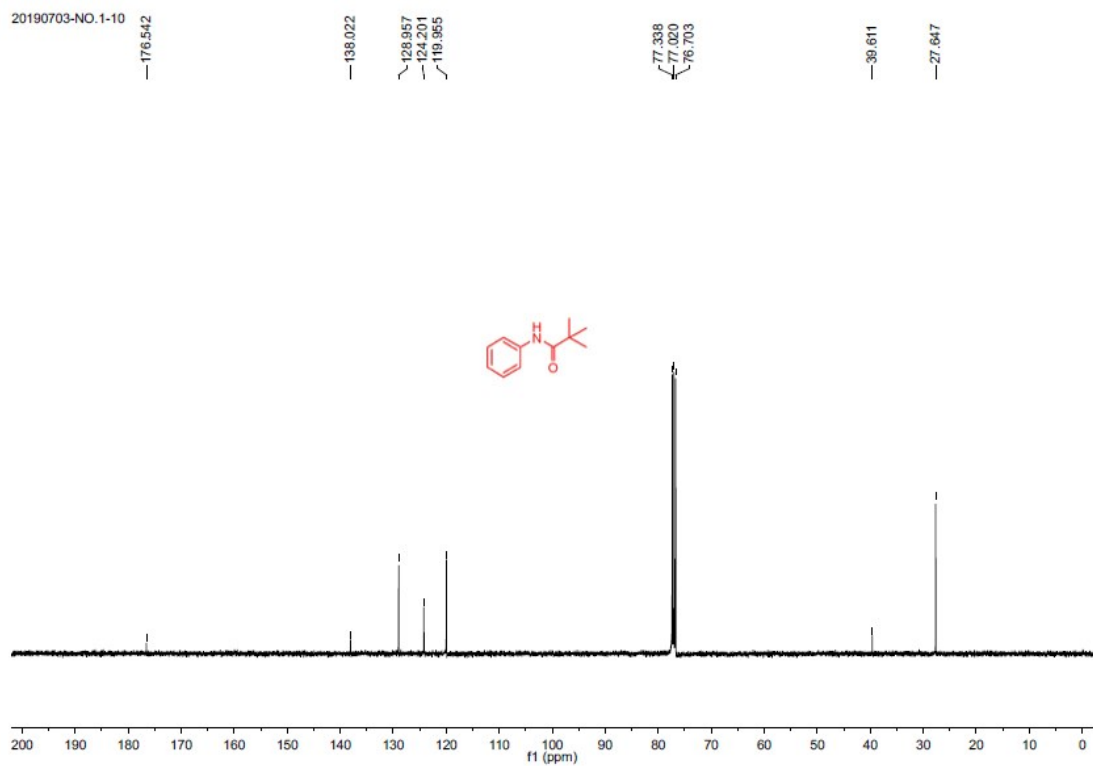

Figure S-37  $^{13}\text{C}$  NMR spectrum of **3ac** ( $\text{CDCl}_3$ )

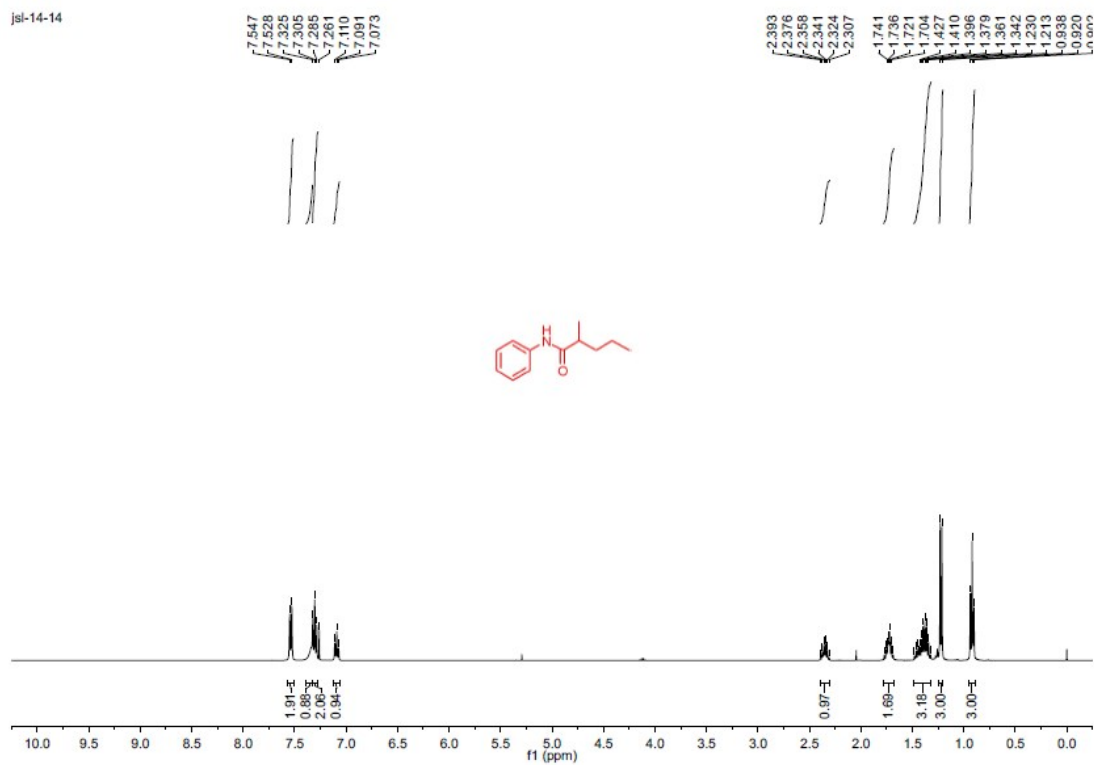

Figure S-38  $^1\text{H}$  NMR spectrum of **3ad** ( $\text{CDCl}_3$ )

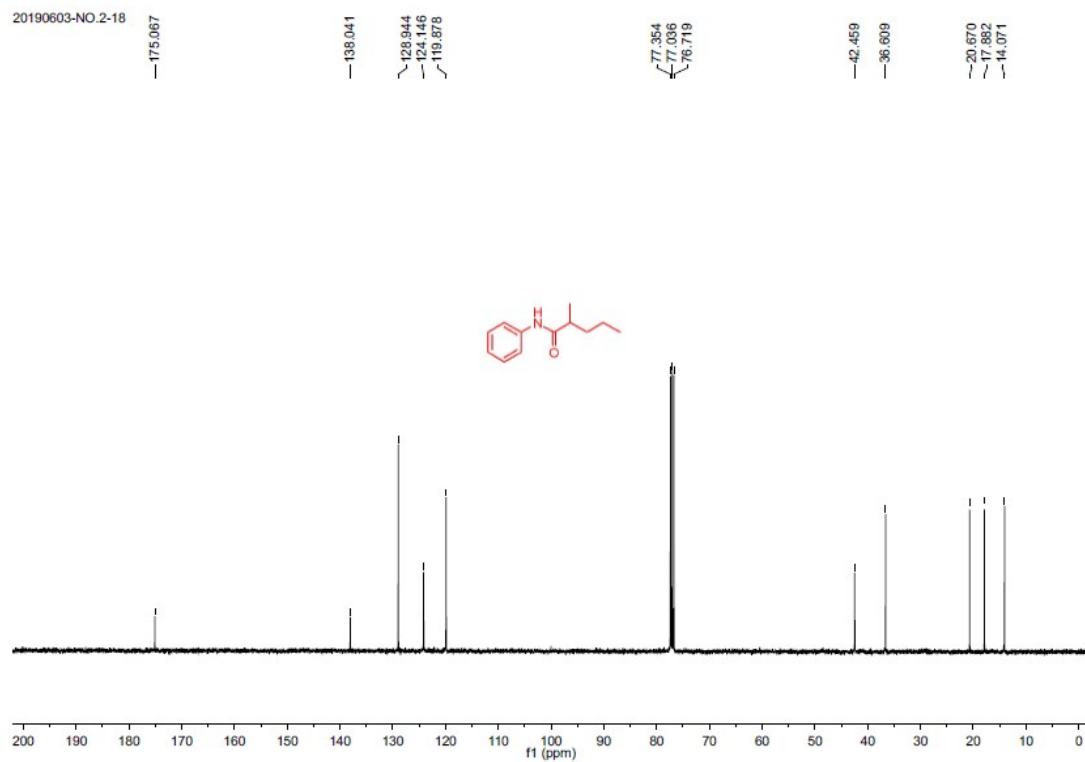

Figure S-39  $^{13}\text{C}$  NMR spectrum of **3ad** ( $\text{CDCl}_3$ )

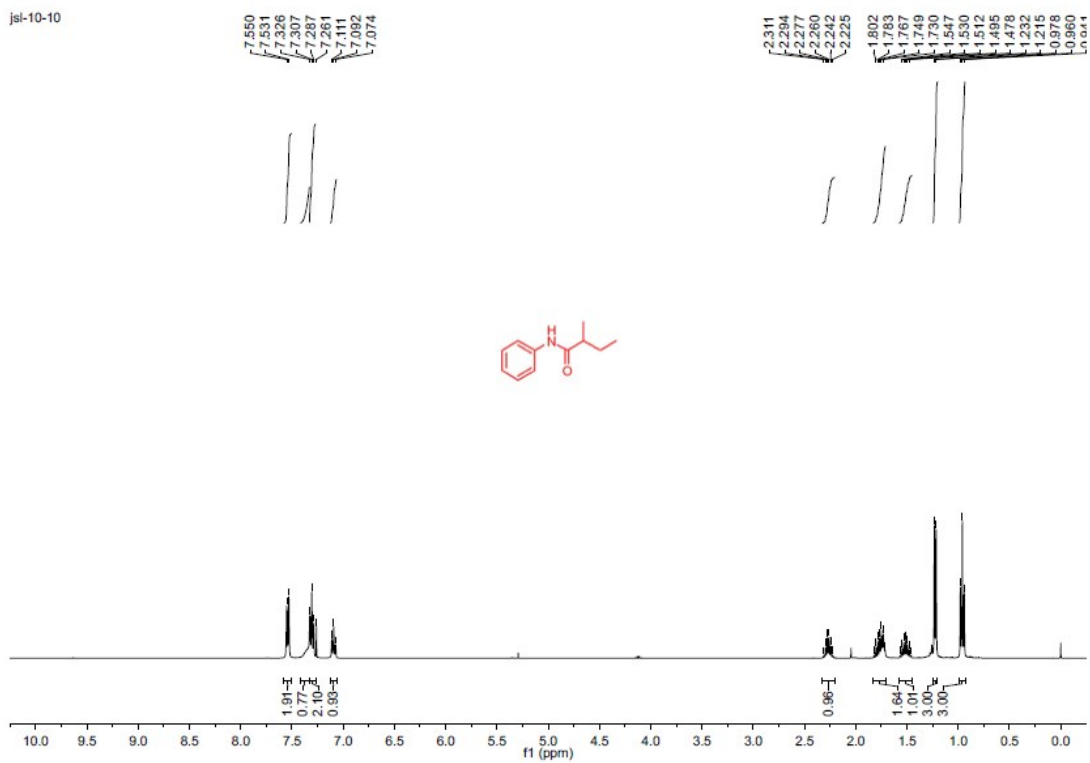

Figure S-40 <sup>1</sup>H NMR spectrum of **3ae** (CDCl<sub>3</sub>)

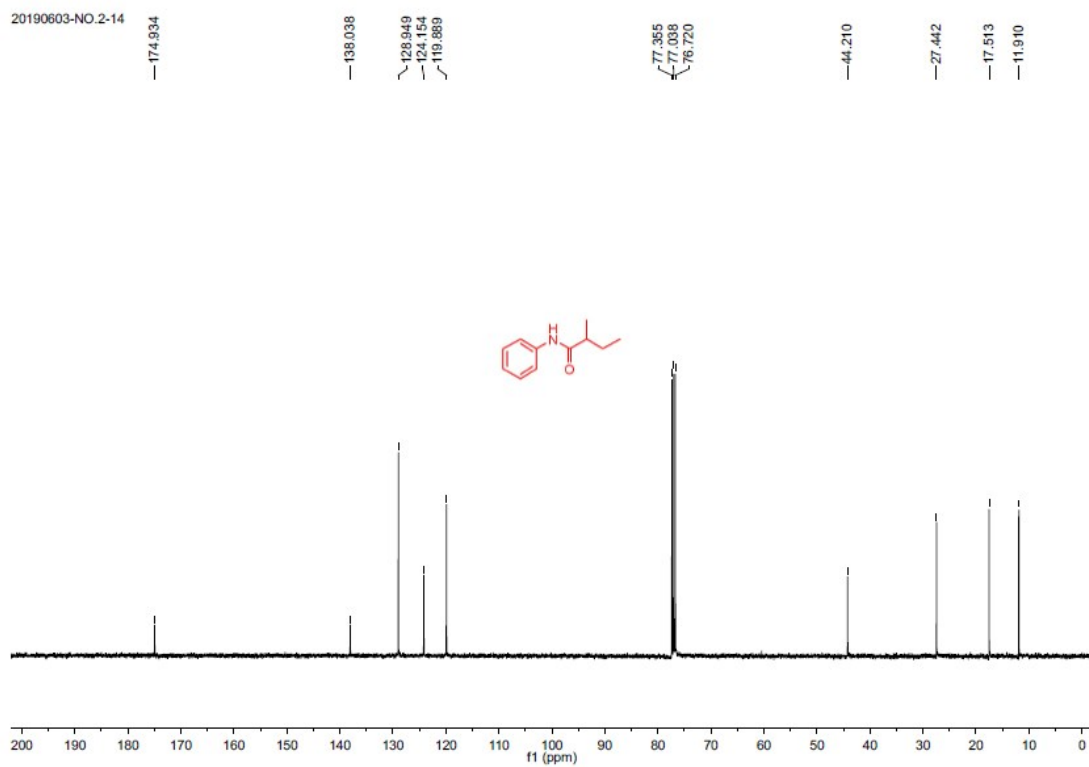

Figure S-41 <sup>13</sup>C NMR spectrum of **3ae** (CDCl<sub>3</sub>)

jsl-11-11

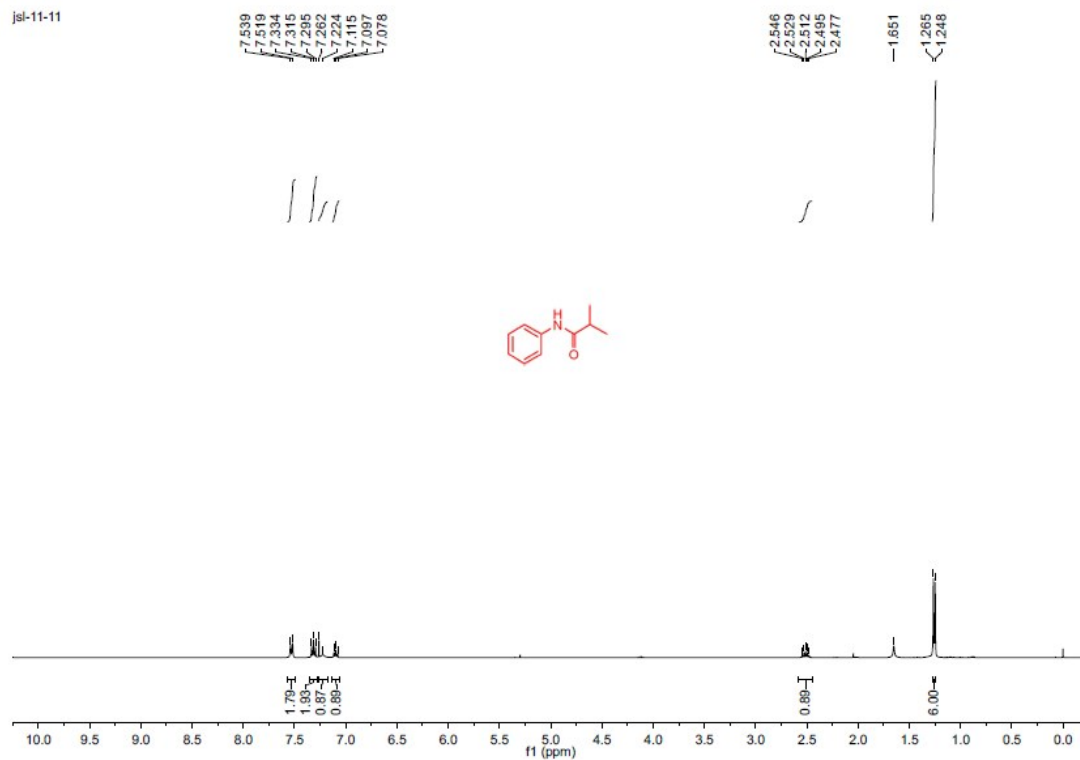

20190603-NO.2-15

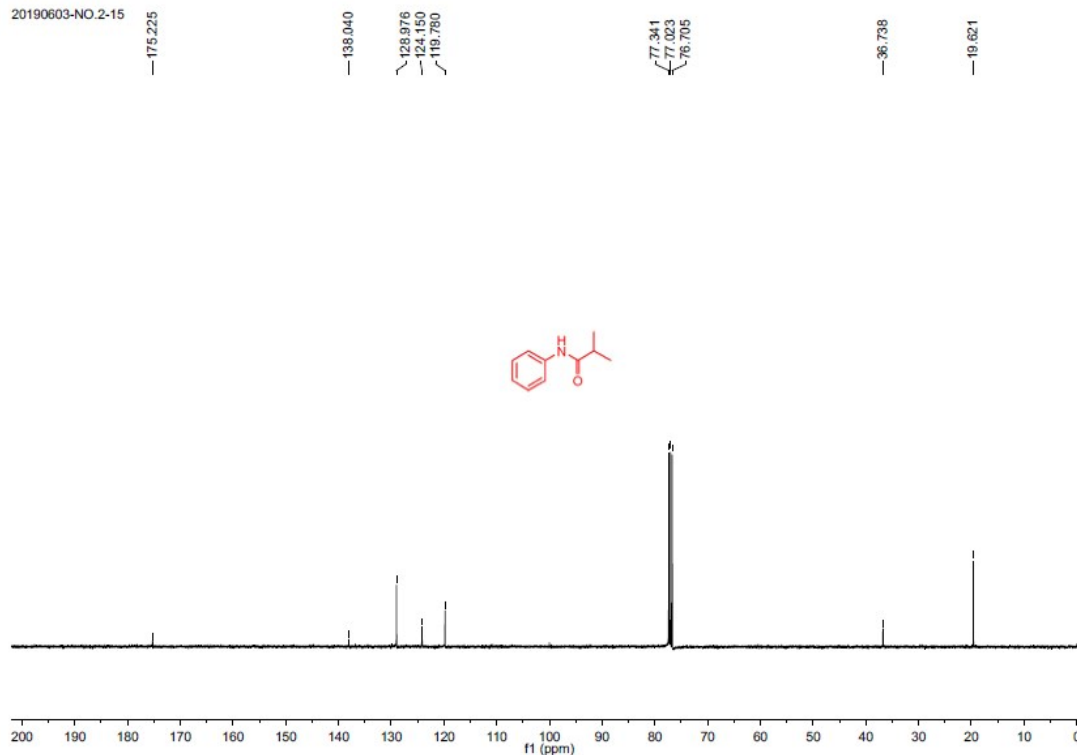

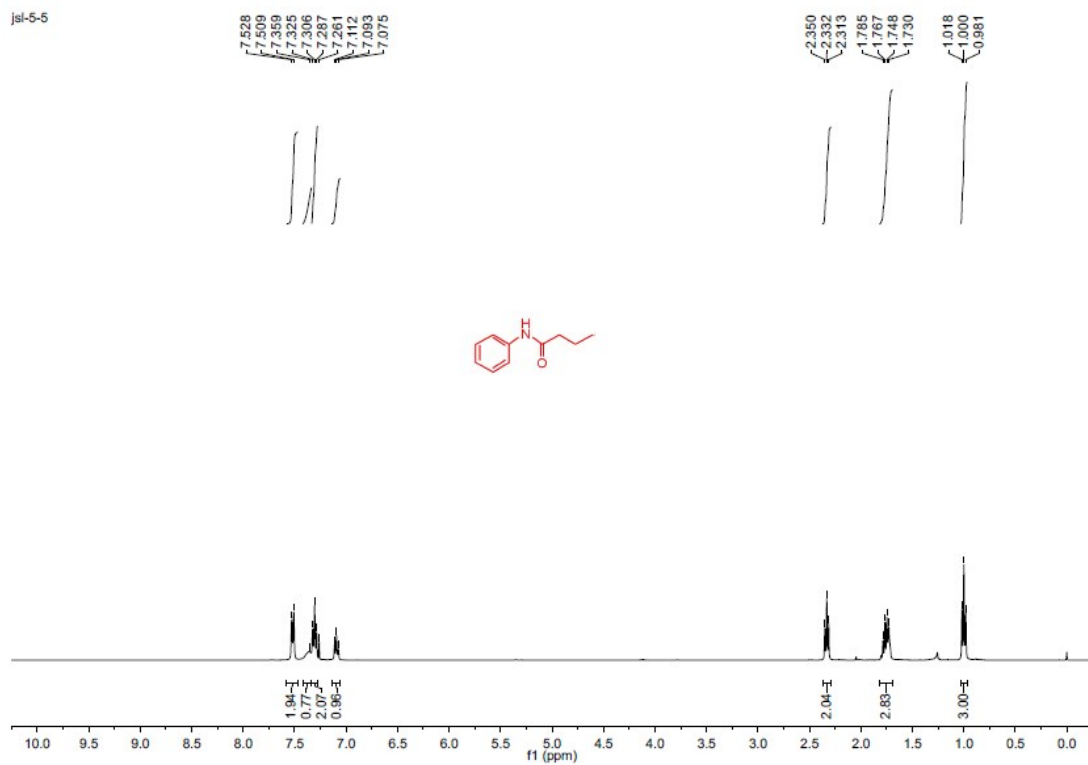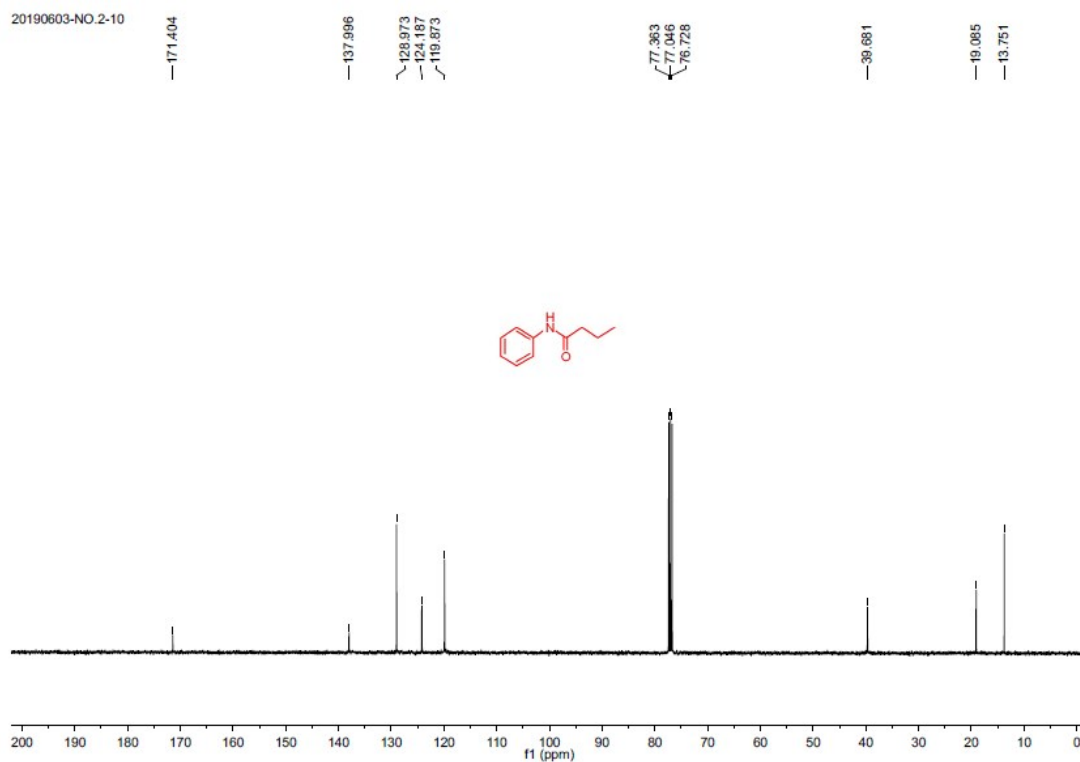



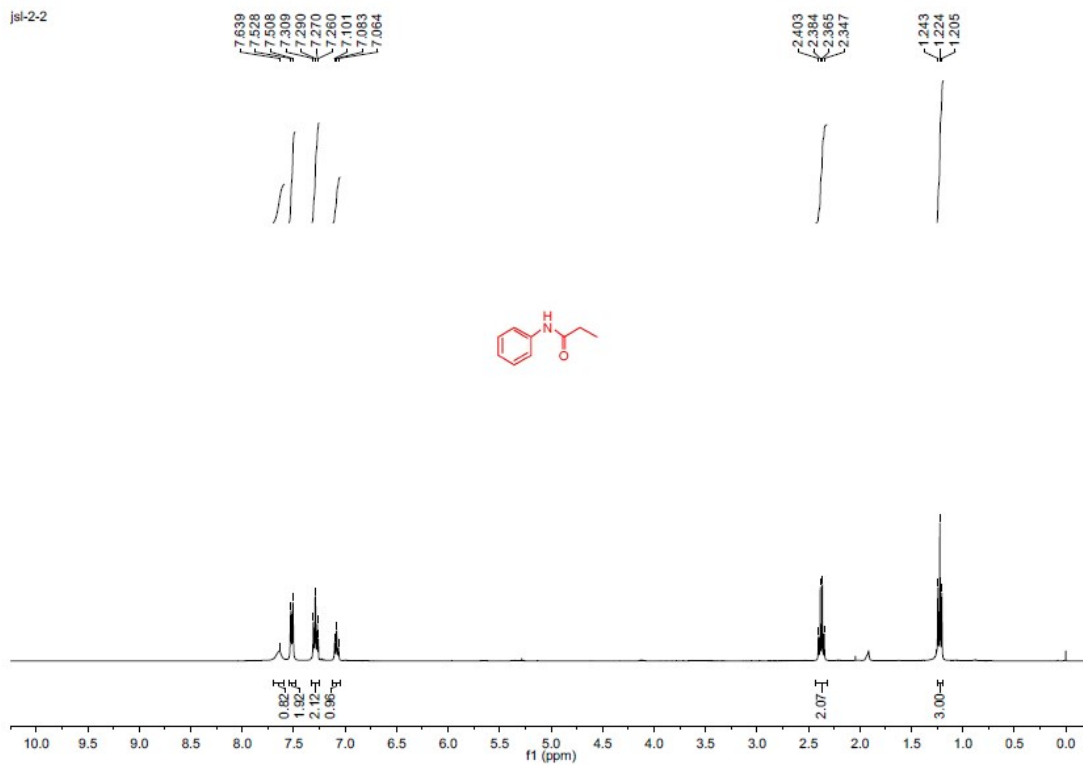

Figure S-46  $^1\text{H}$  NMR spectrum of **3ah** ( $\text{CDCl}_3$ )

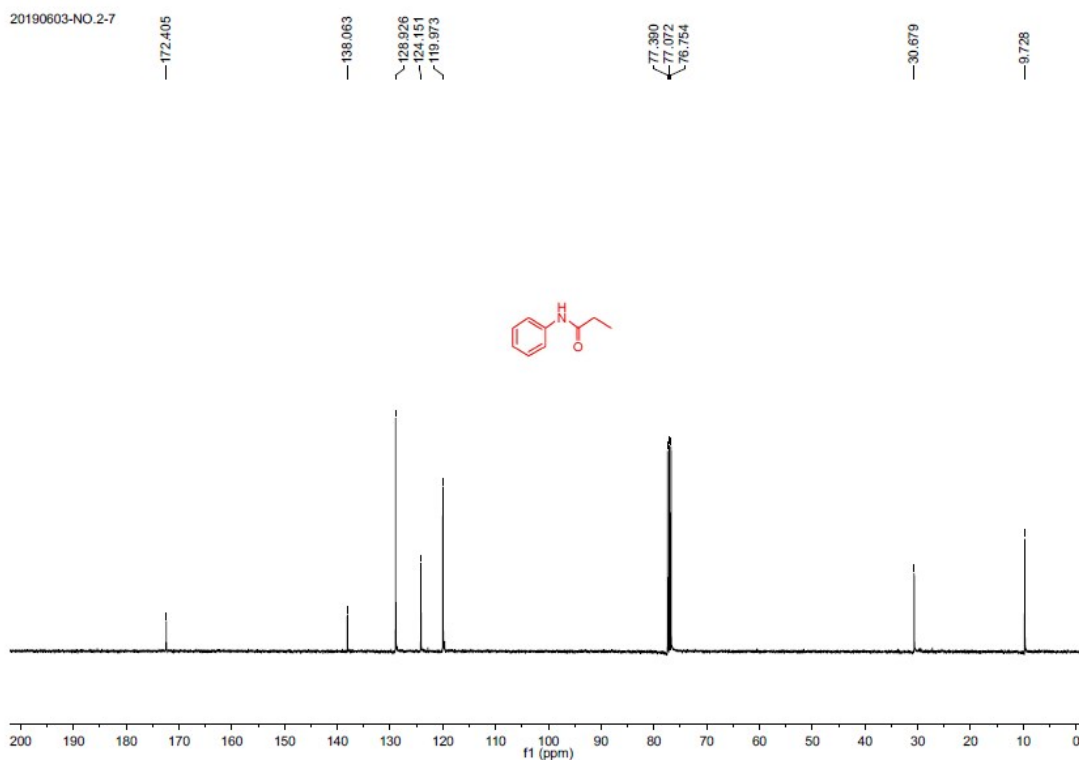

Figure S-47  $^{13}\text{C}$  NMR spectrum of **3ah** ( $\text{CDCl}_3$ )

jsl-13-13

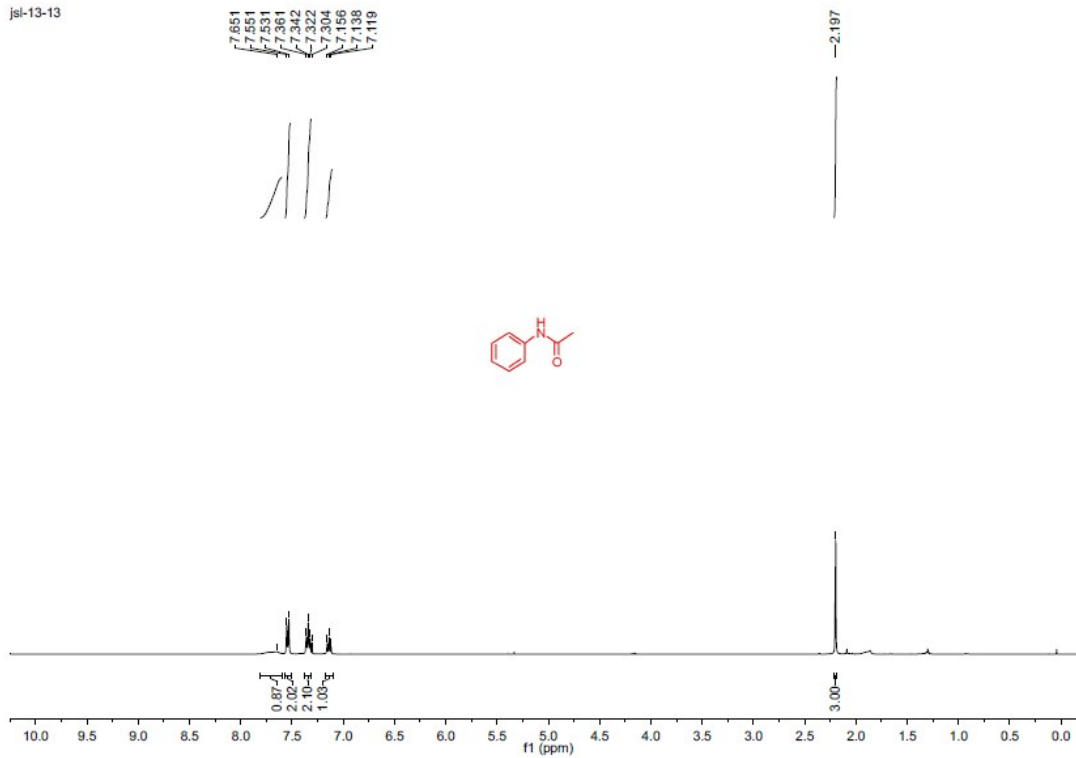

Figure S-48  $^1\text{H}$  NMR spectrum of **3ai** ( $\text{CDCl}_3$ )

20190603-NO.2-17

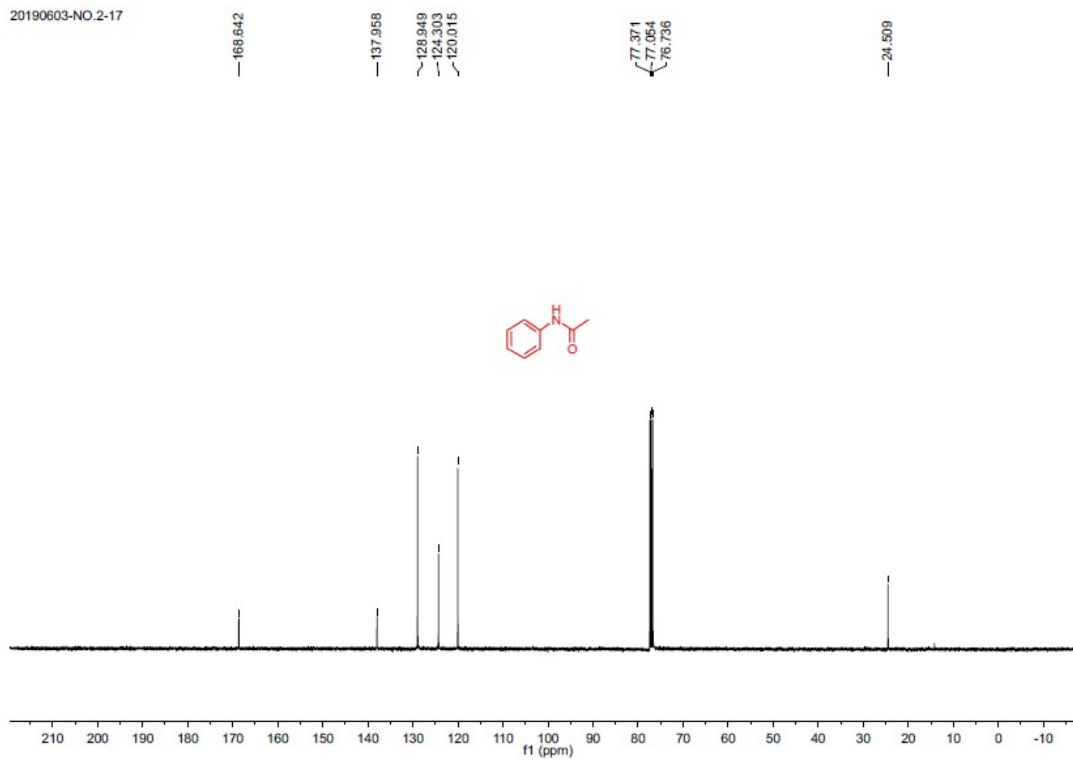

Figure S-49  $^{13}\text{C}$  NMR spectrum of **3ai** ( $\text{CDCl}_3$ )

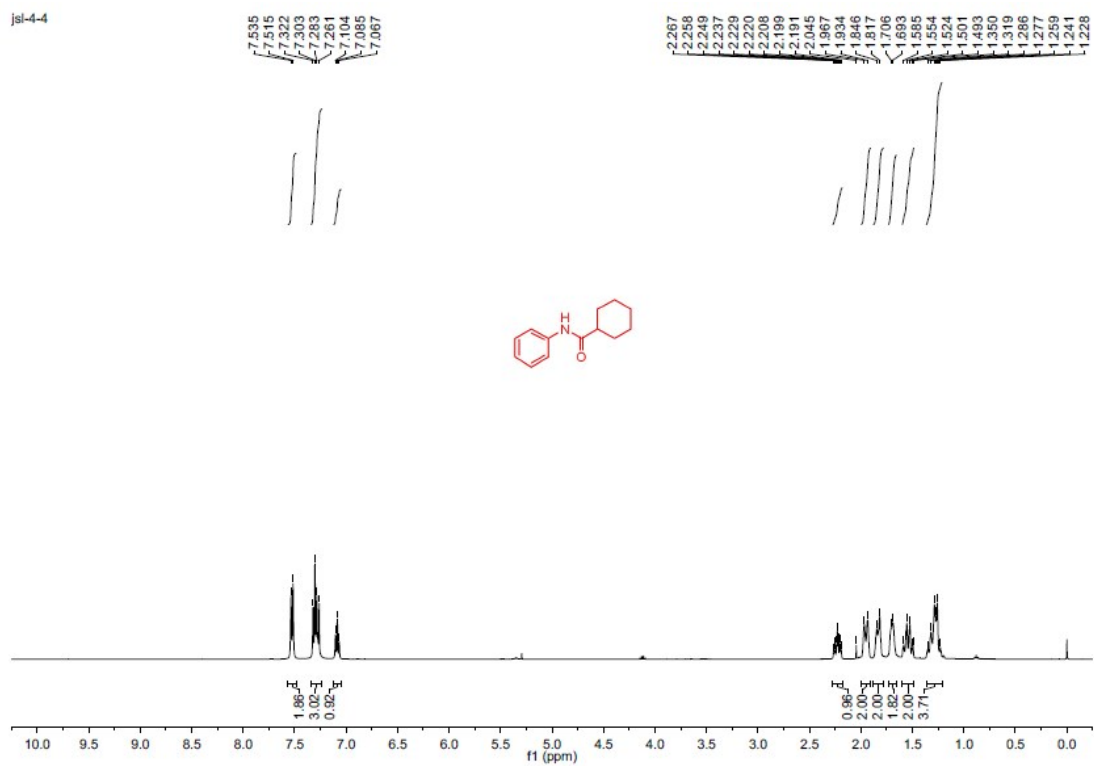

Figure S-50  $^1\text{H}$  NMR spectrum of **3aj** ( $\text{CDCl}_3$ )

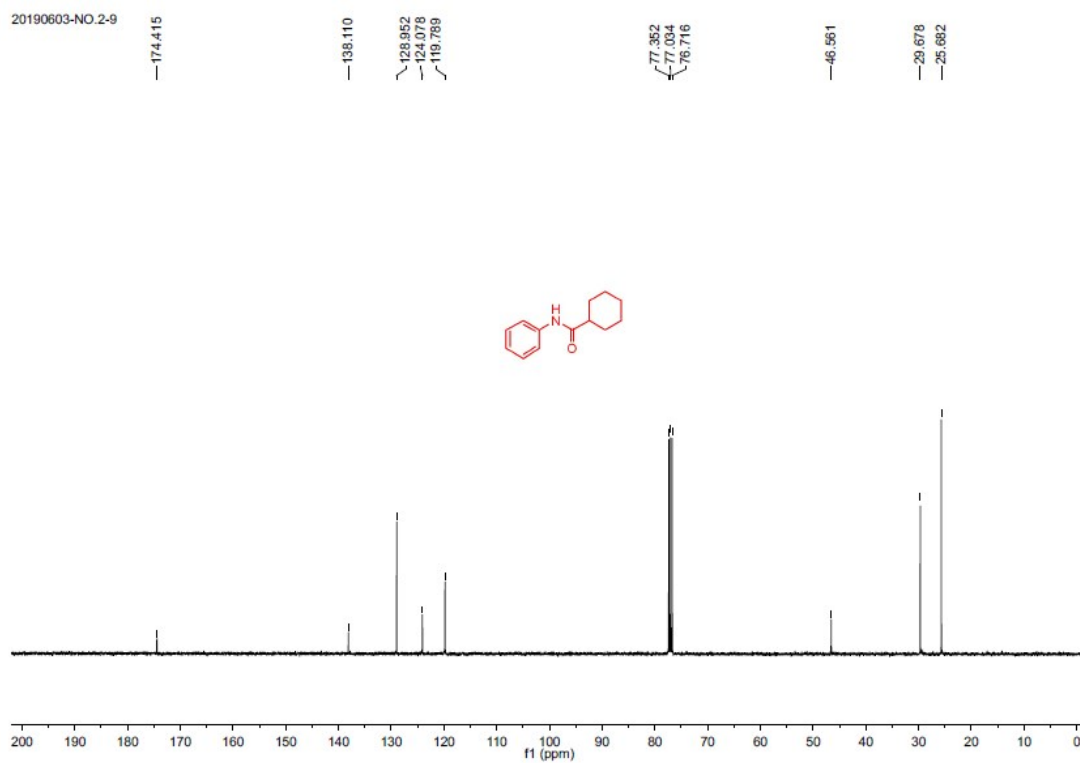

Figure S-51  $^{13}\text{C}$  NMR spectrum of **3aj** ( $\text{CDCl}_3$ )

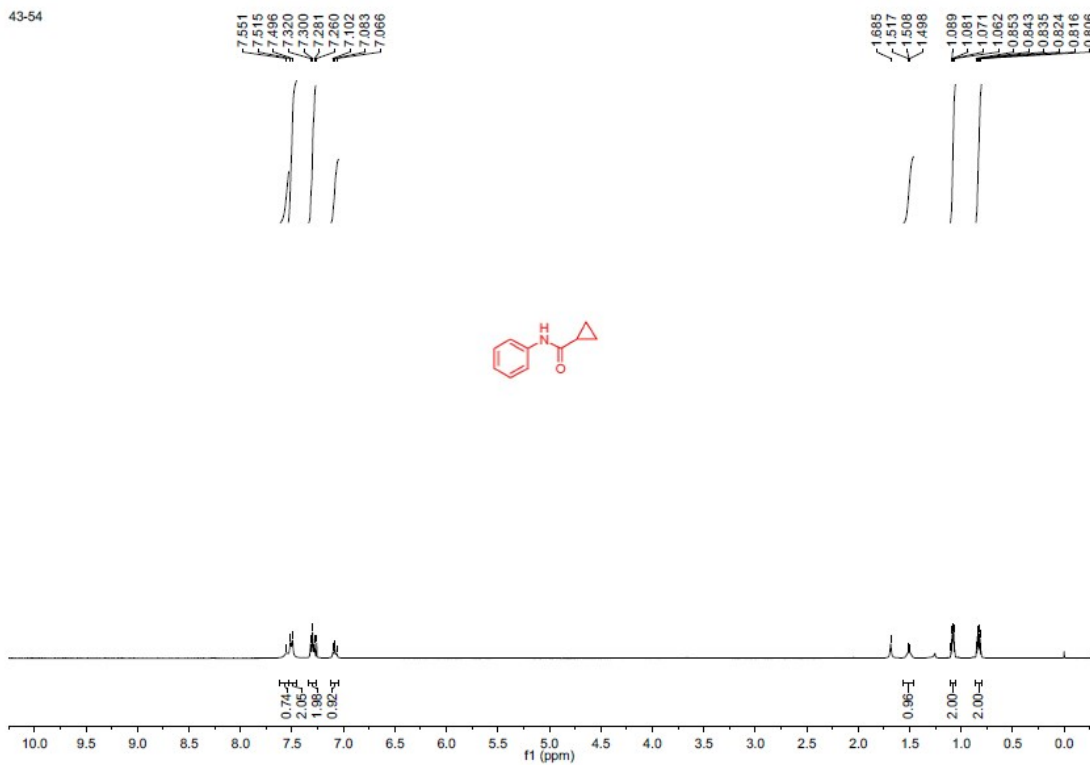

Figure S-52  $^1\text{H}$  NMR spectrum of **3ak** ( $\text{CDCl}_3$ )

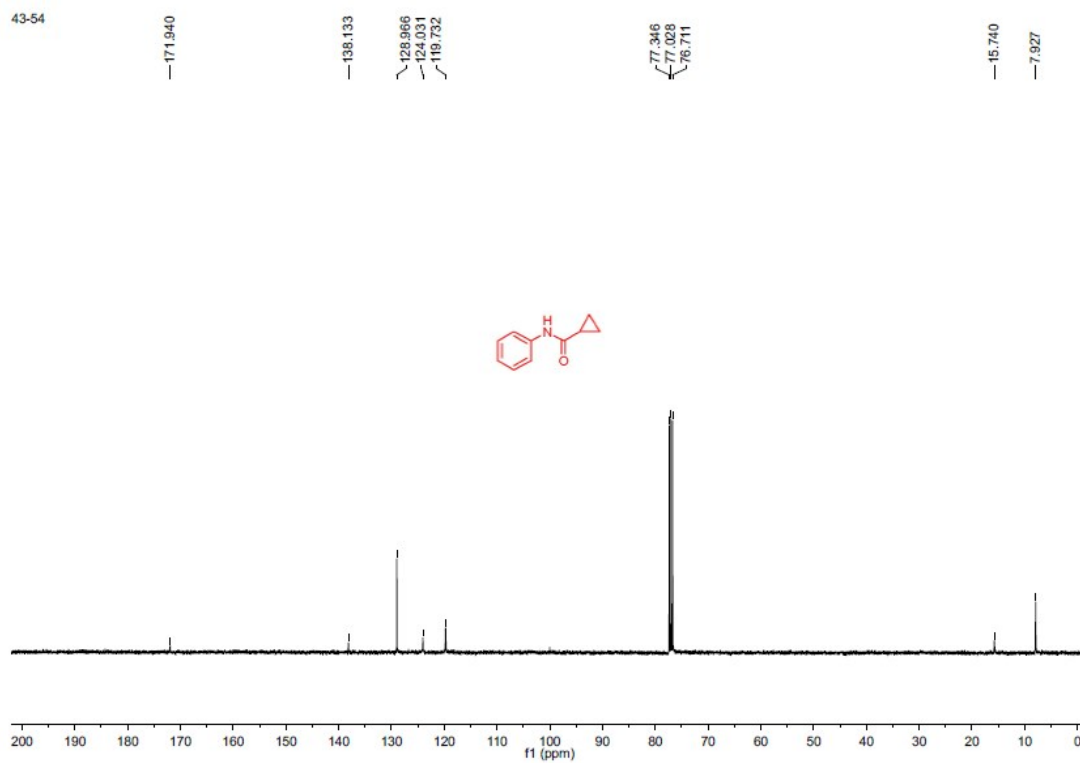

Figure S-53  $^{13}\text{C}$  NMR spectrum of **3ak** ( $\text{CDCl}_3$ )

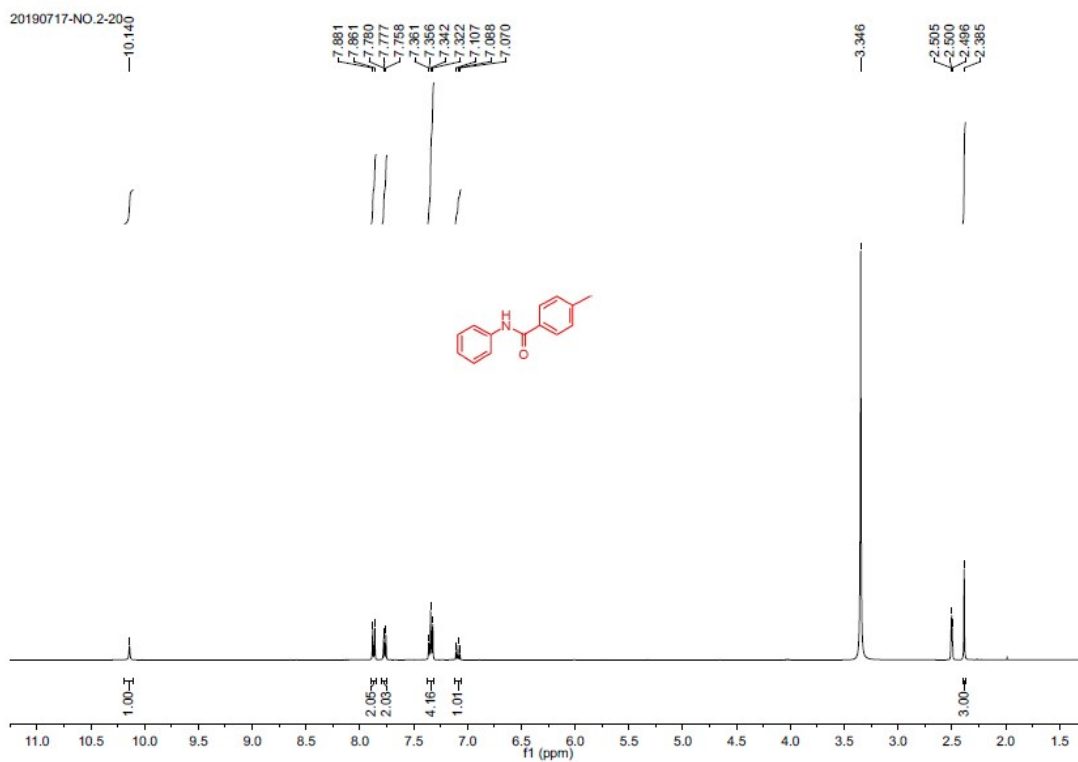

Figure S-54  $^1\text{H}$  NMR spectrum of **3al** ( $\text{DMSO-}d_6$ )

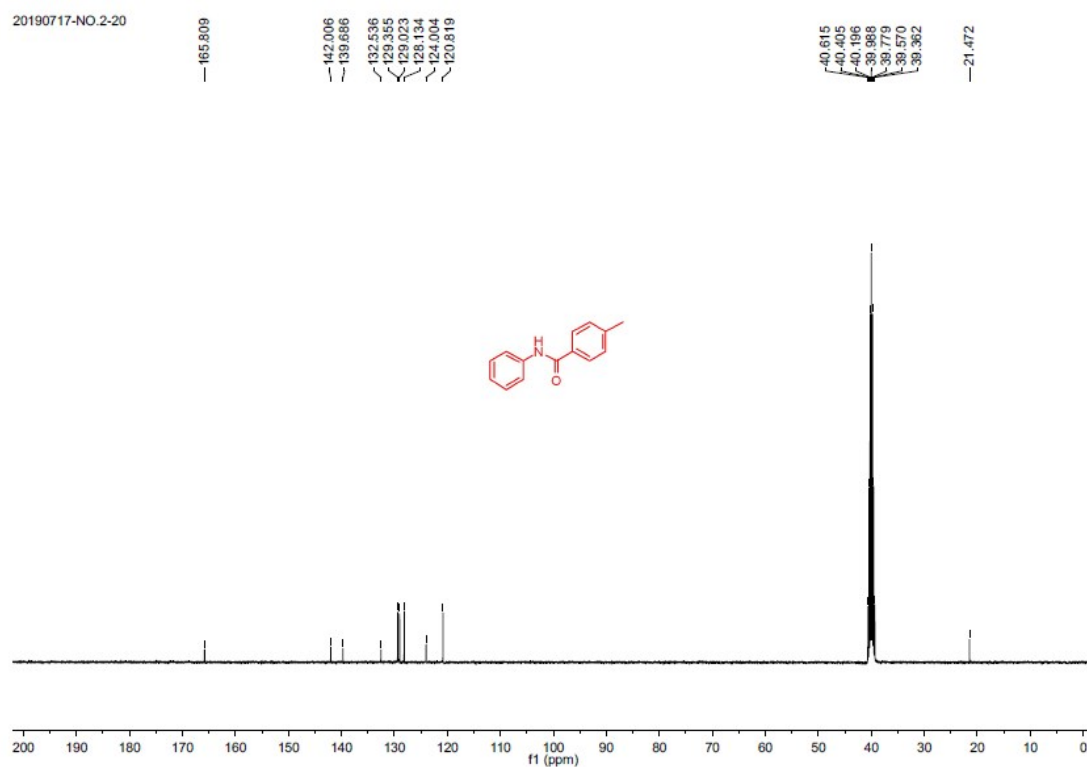

Figure S-55  $^{13}\text{C}$  NMR spectrum of **3al** ( $\text{DMSO-}d_6$ )

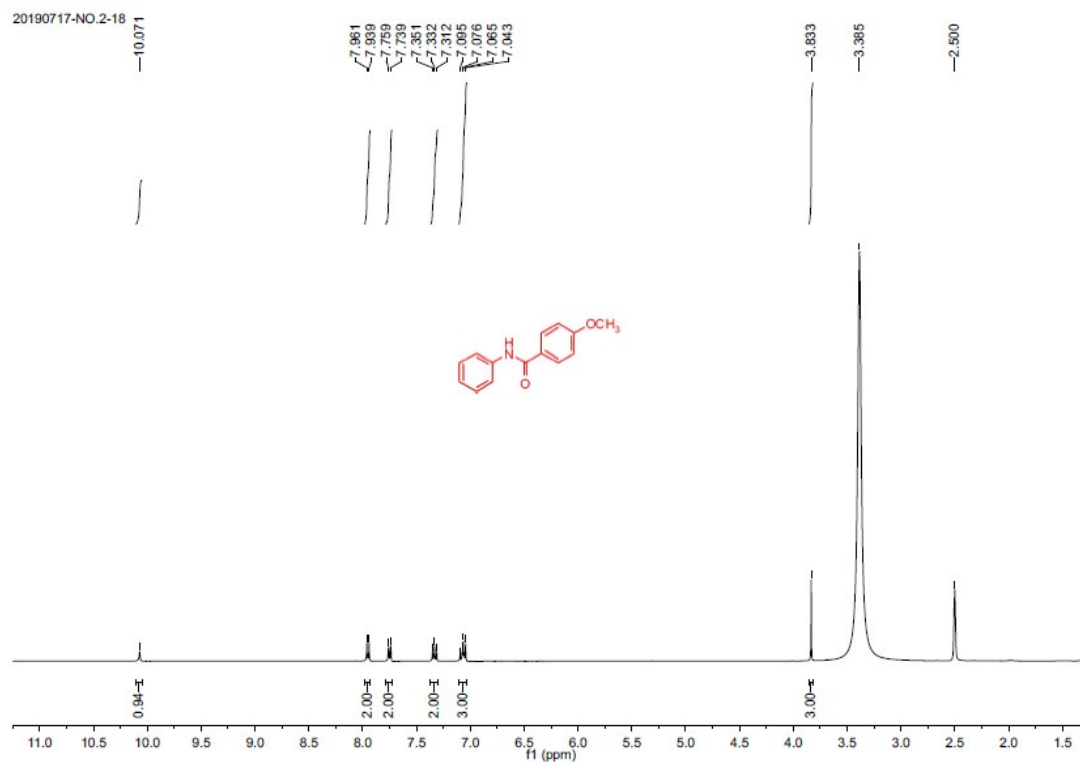

Figure S-56  $^1\text{H}$  NMR spectrum of **3am** ( $\text{DMSO-}d_6$ )

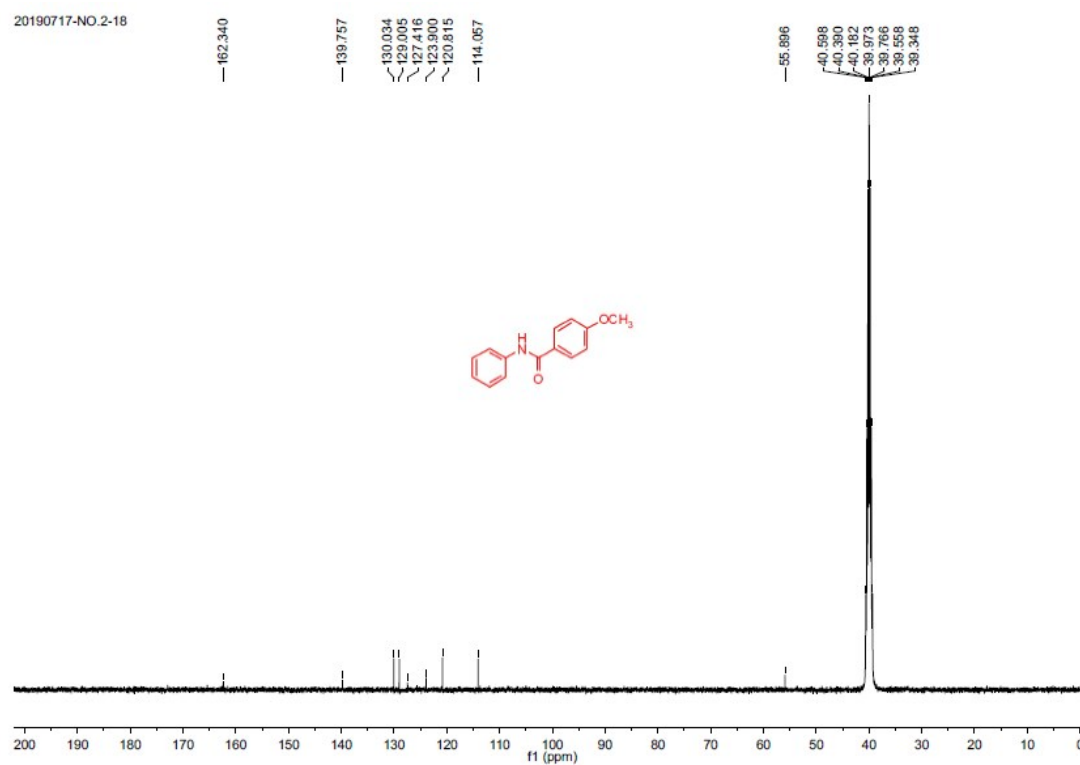

Figure S-57  $^{13}\text{C}$  NMR spectrum of **3am** ( $\text{DMSO-}d_6$ )

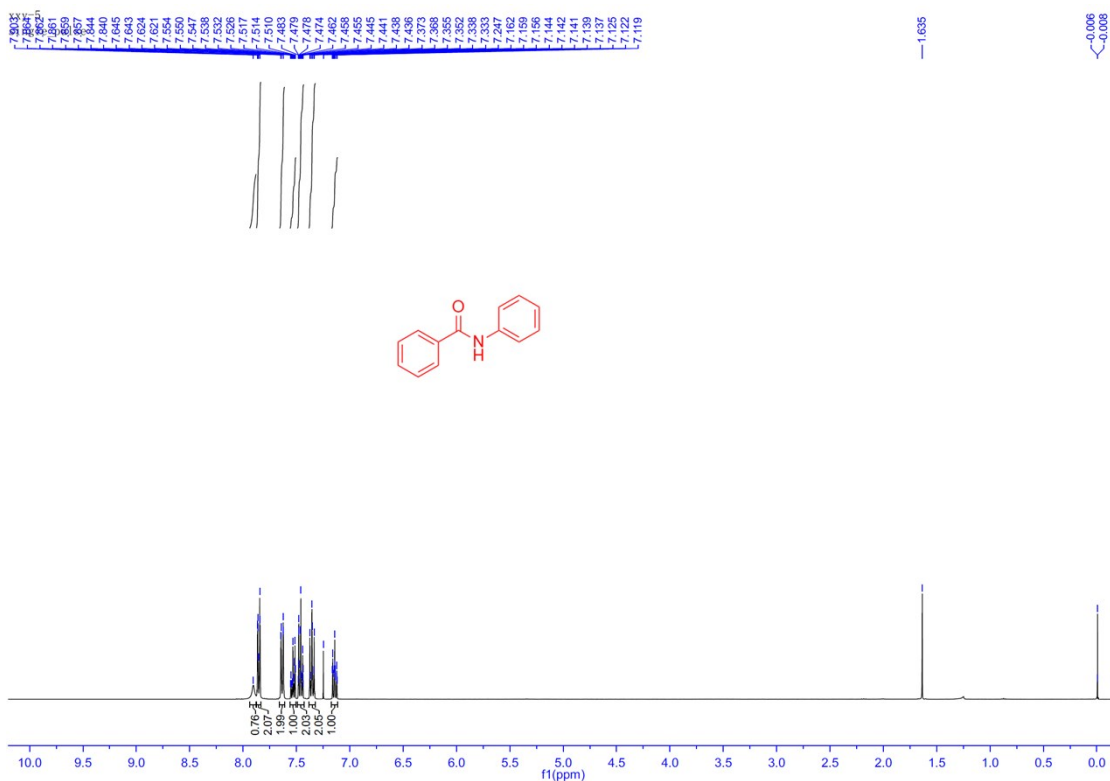

Figure S-58  $^{13}\text{C}$  NMR spectrum of **3an** ( $\text{CDCl}_3$ )

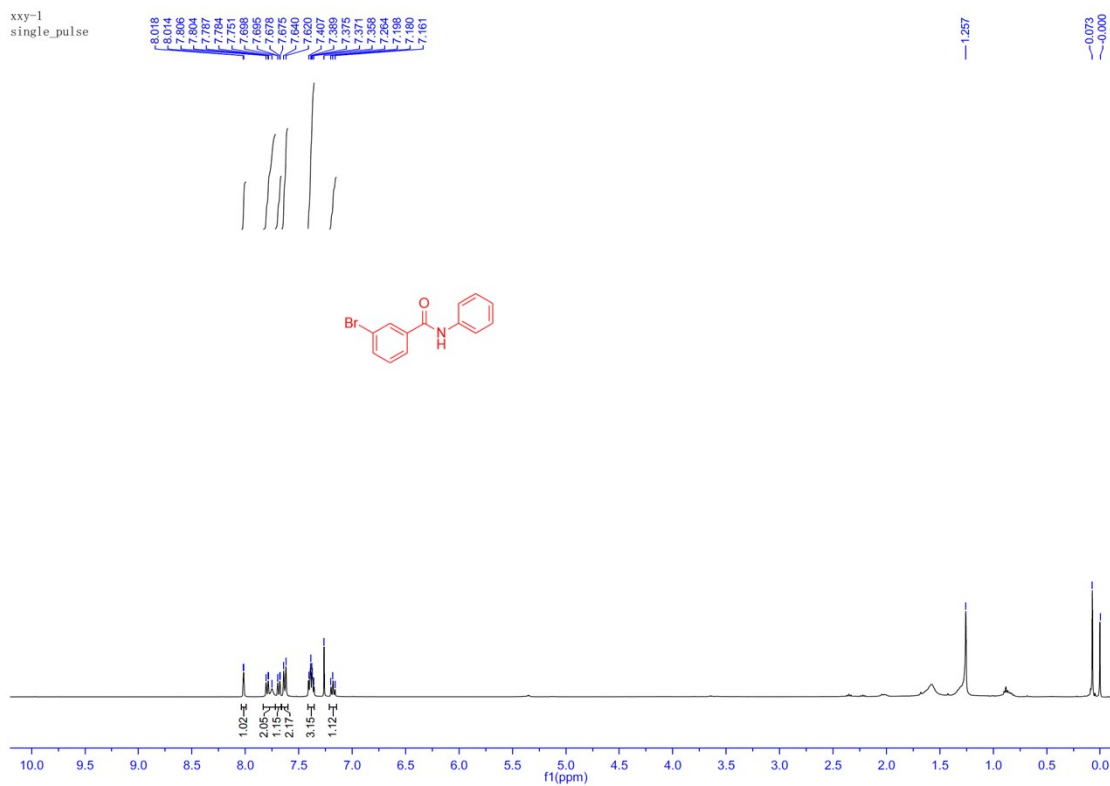

Figure S-59  $^{13}\text{C}$  NMR spectrum of **3ao** ( $\text{CDCl}_3$ )

xxy-4  
single\_pulse

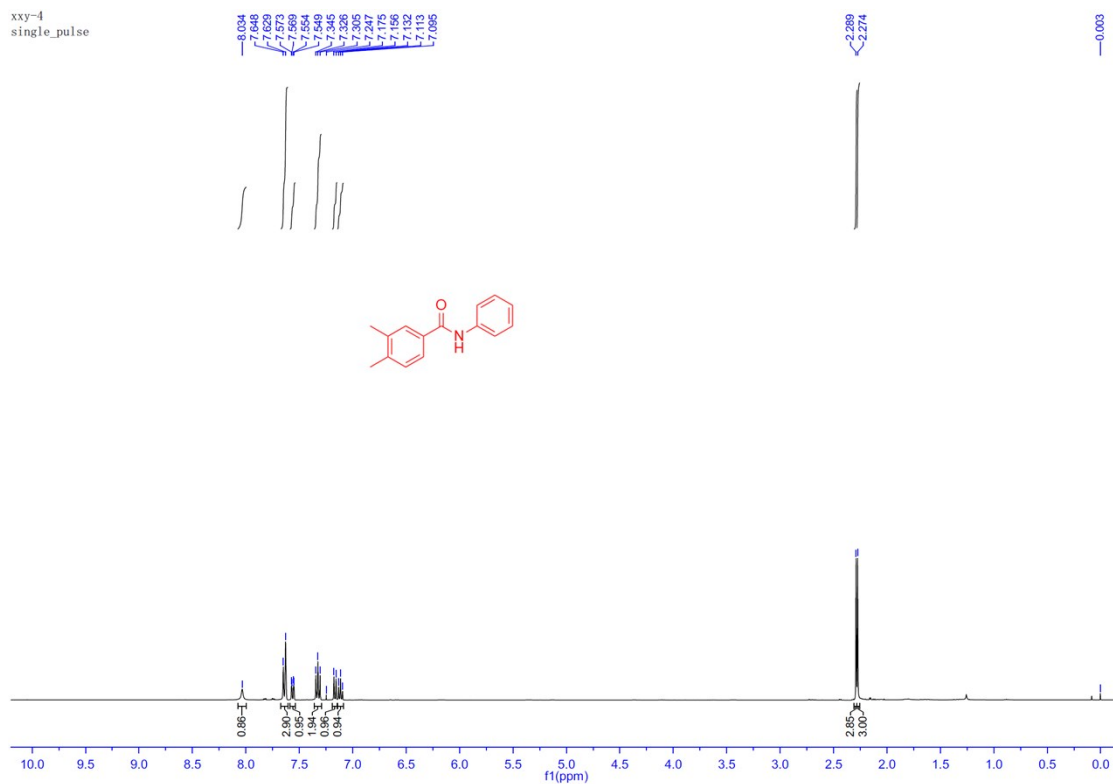

Figure S-60 <sup>13</sup>C NMR spectrum of **3ap** (CDCl<sub>3</sub>)



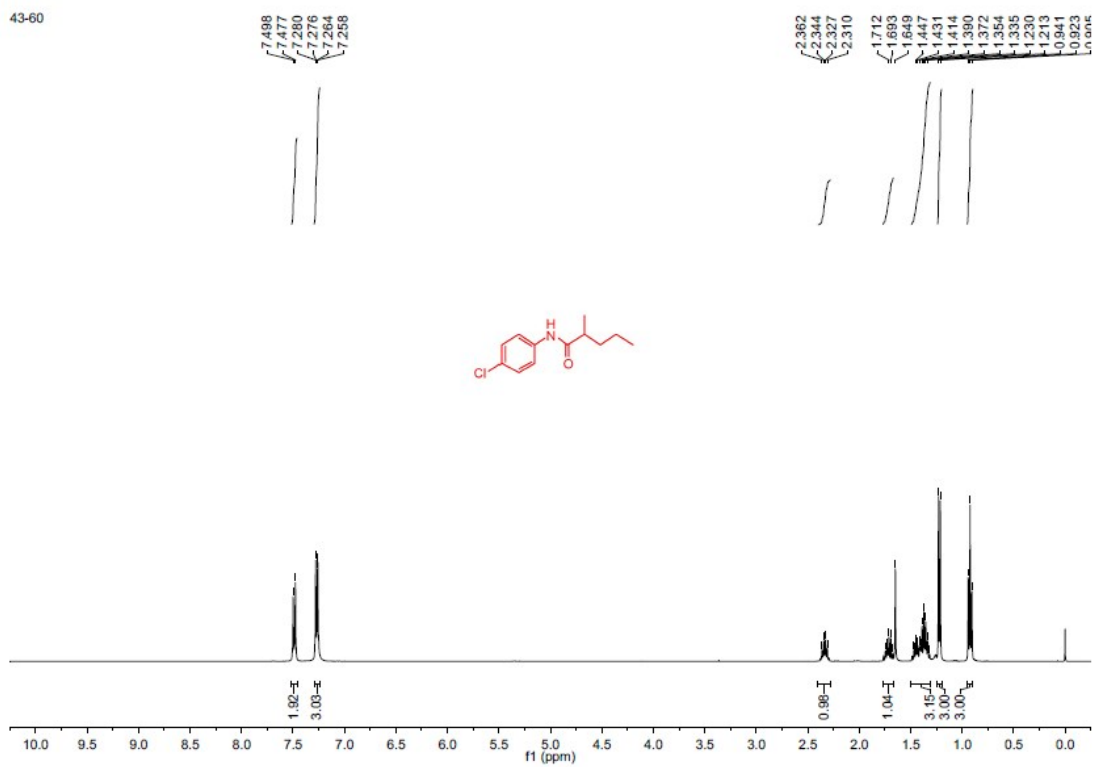

Figure S-61 <sup>1</sup>H NMR spectrum of **3dd** (CDCl<sub>3</sub>)

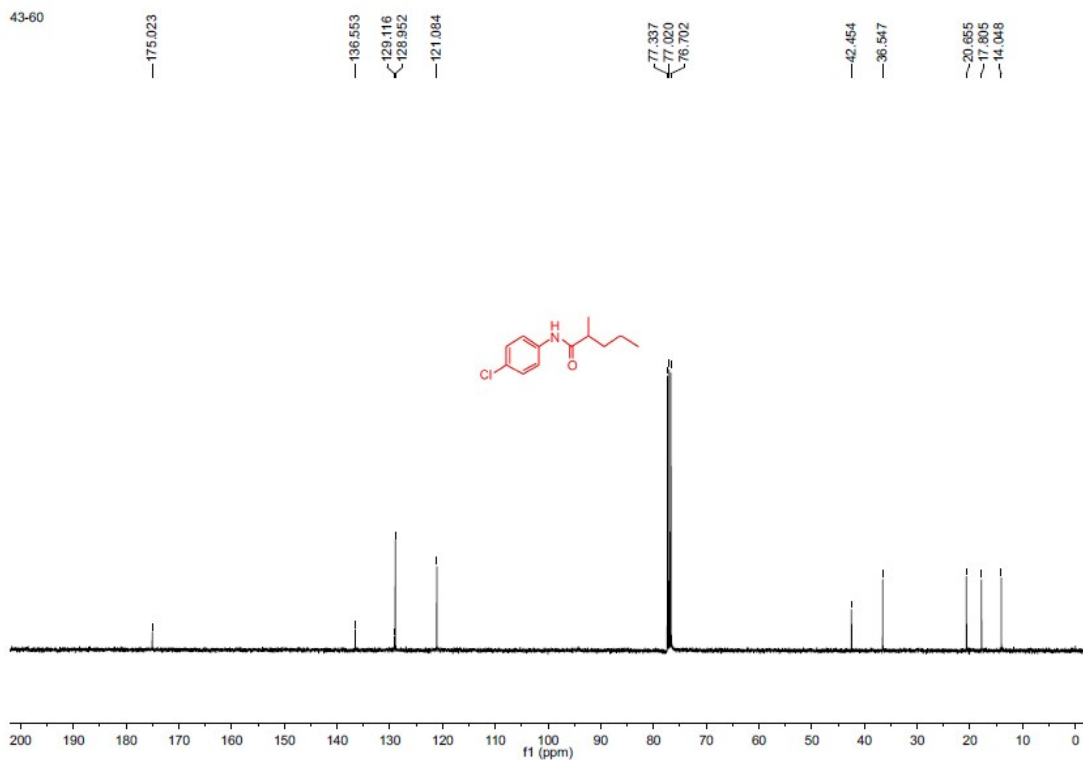

Figure S-62 <sup>13</sup>C NMR spectrum of **3dd** (CDCl<sub>3</sub>)

43-60-1

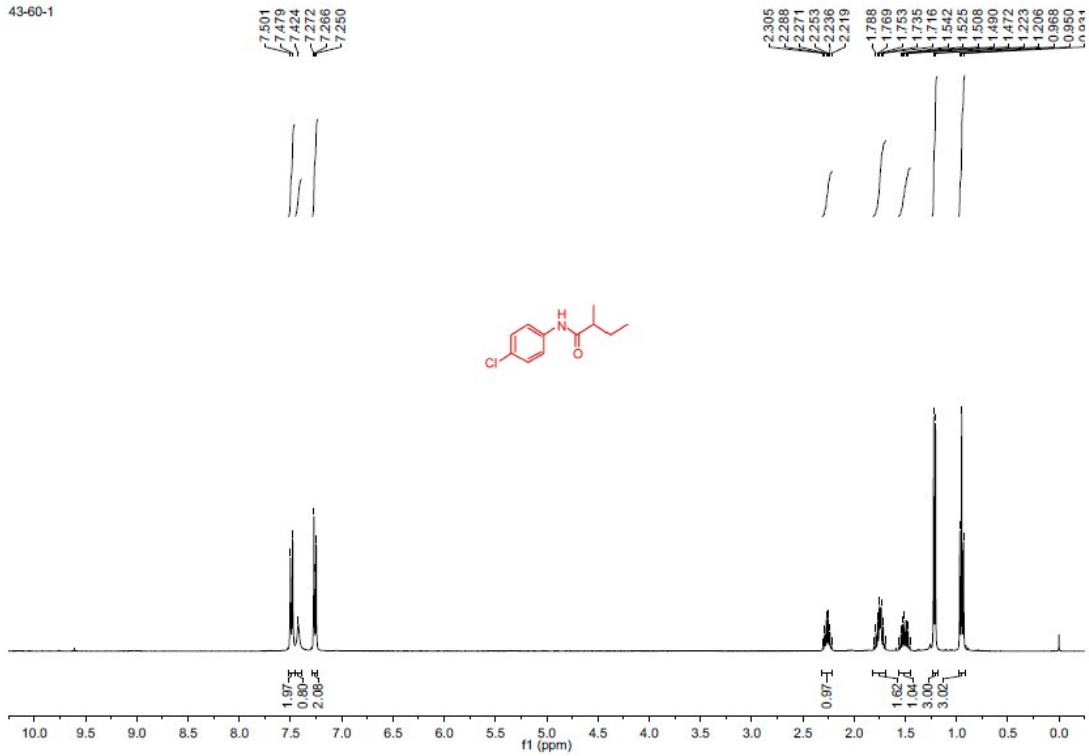Figure S-63 <sup>1</sup>H NMR spectrum of **3de** (CDCl<sub>3</sub>)

43-60-1

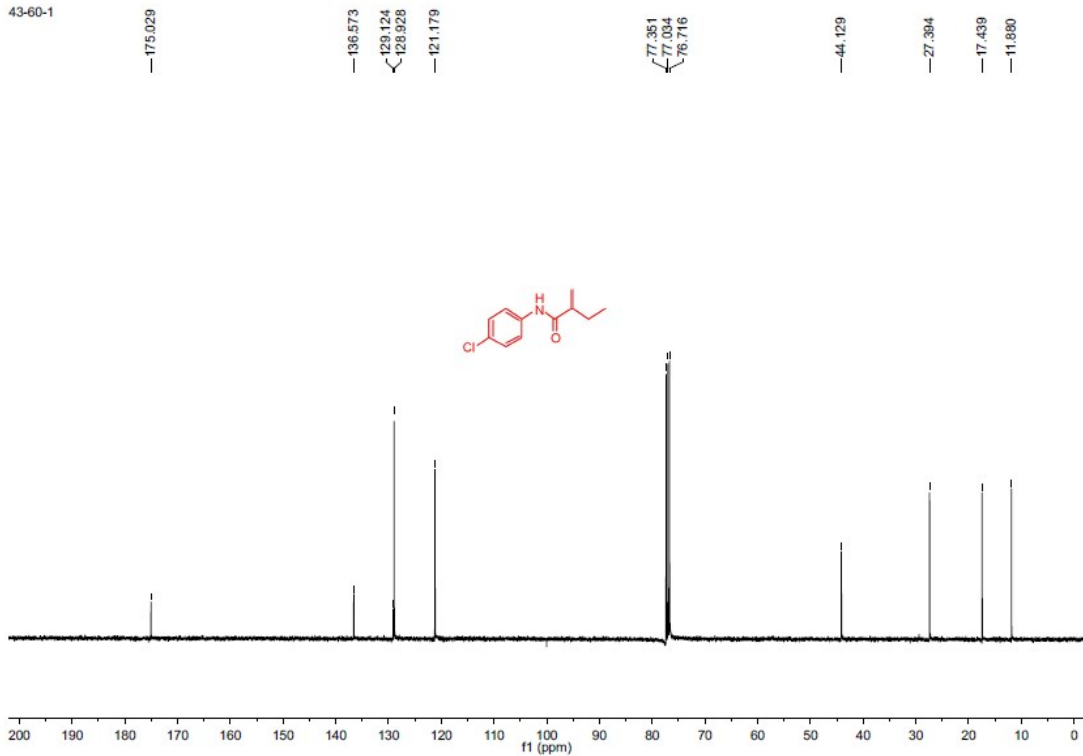Figure S-64 <sup>13</sup>C NMR spectrum of **3de** (CDCl<sub>3</sub>)

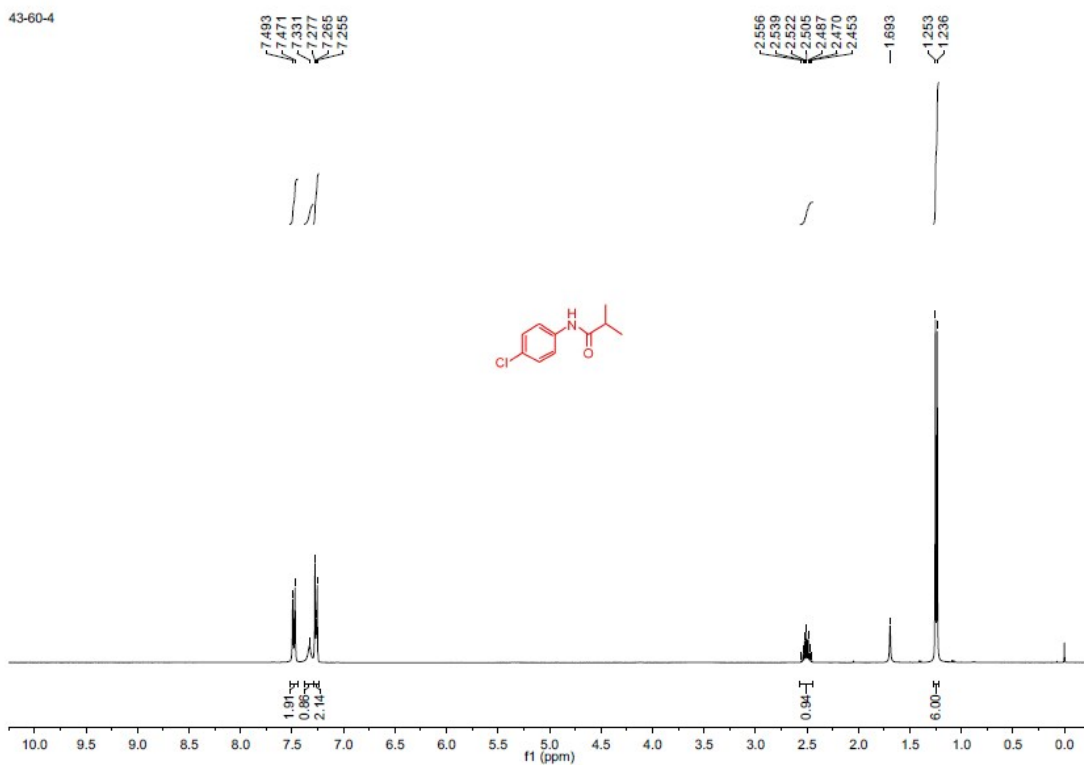

Figure S-65  $^1\text{H}$  NMR spectrum of **3df** ( $\text{CDCl}_3$ )

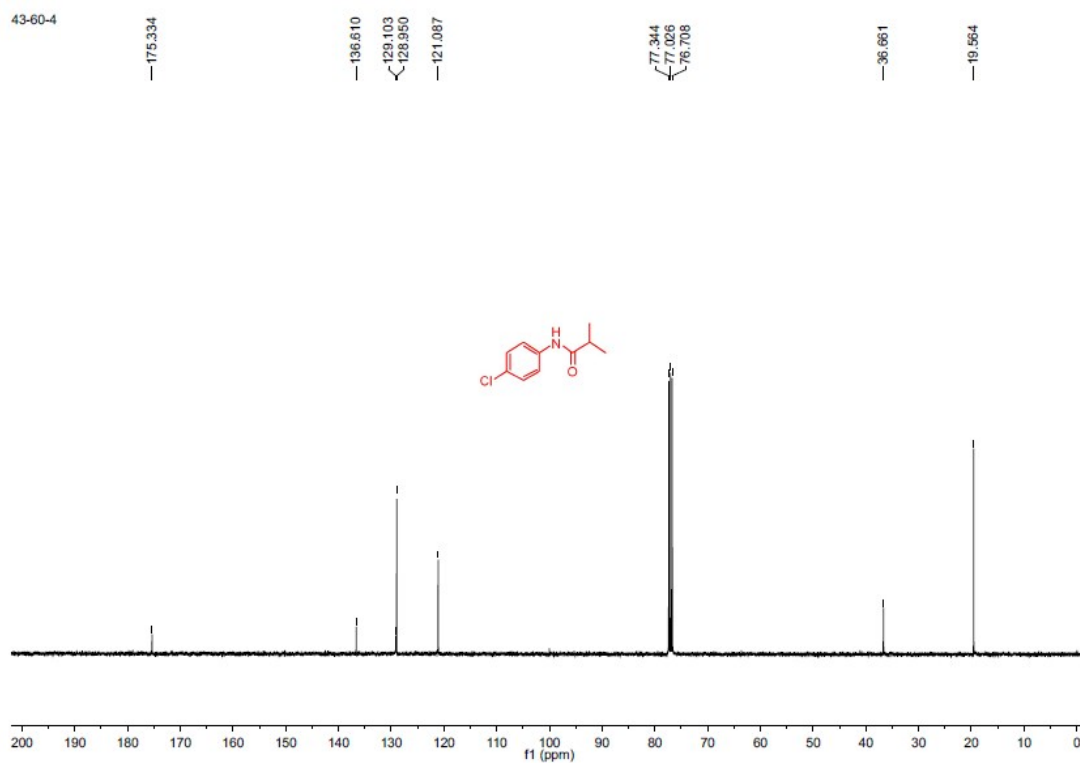

Figure S-66  $^{13}\text{C}$  NMR spectrum of **3df** ( $\text{CDCl}_3$ )

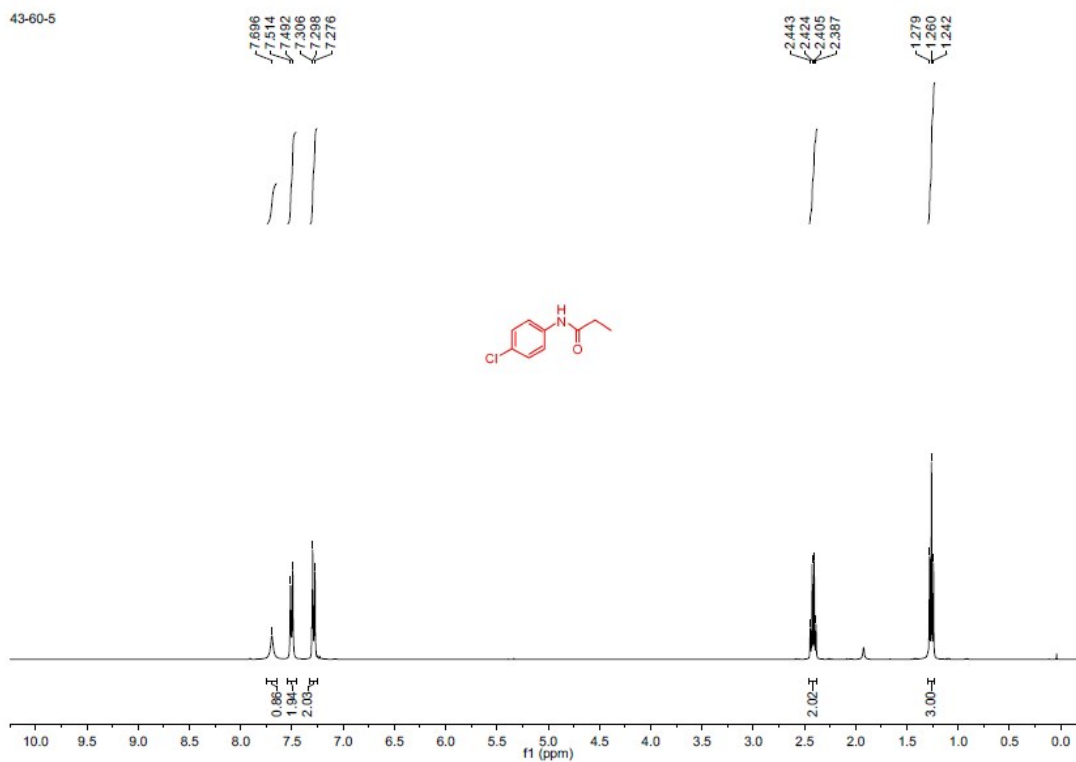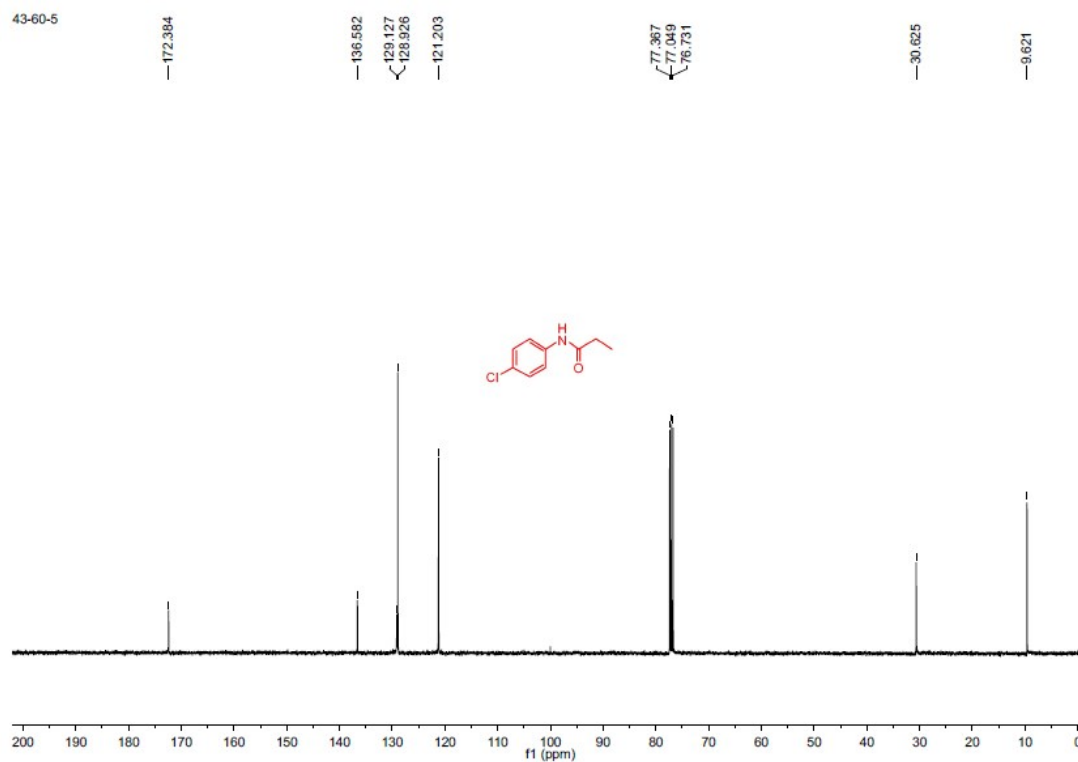

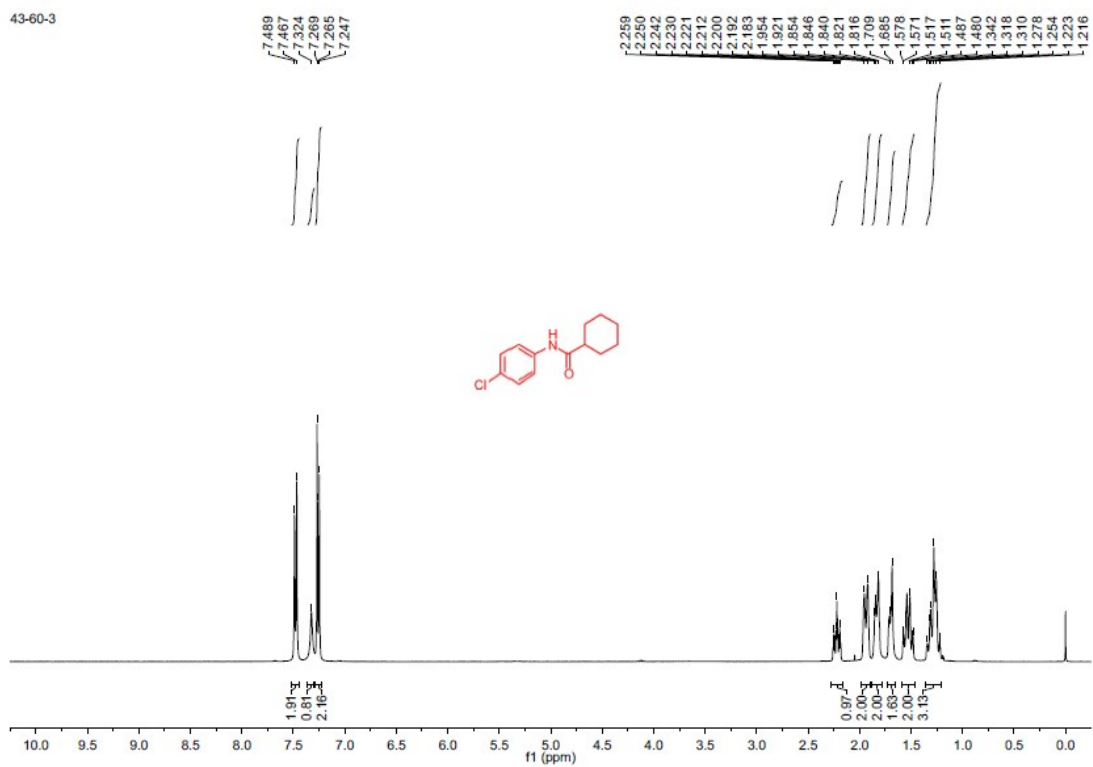

Figure S-69 <sup>1</sup>H NMR spectrum of **3dj** (CDCl<sub>3</sub>)

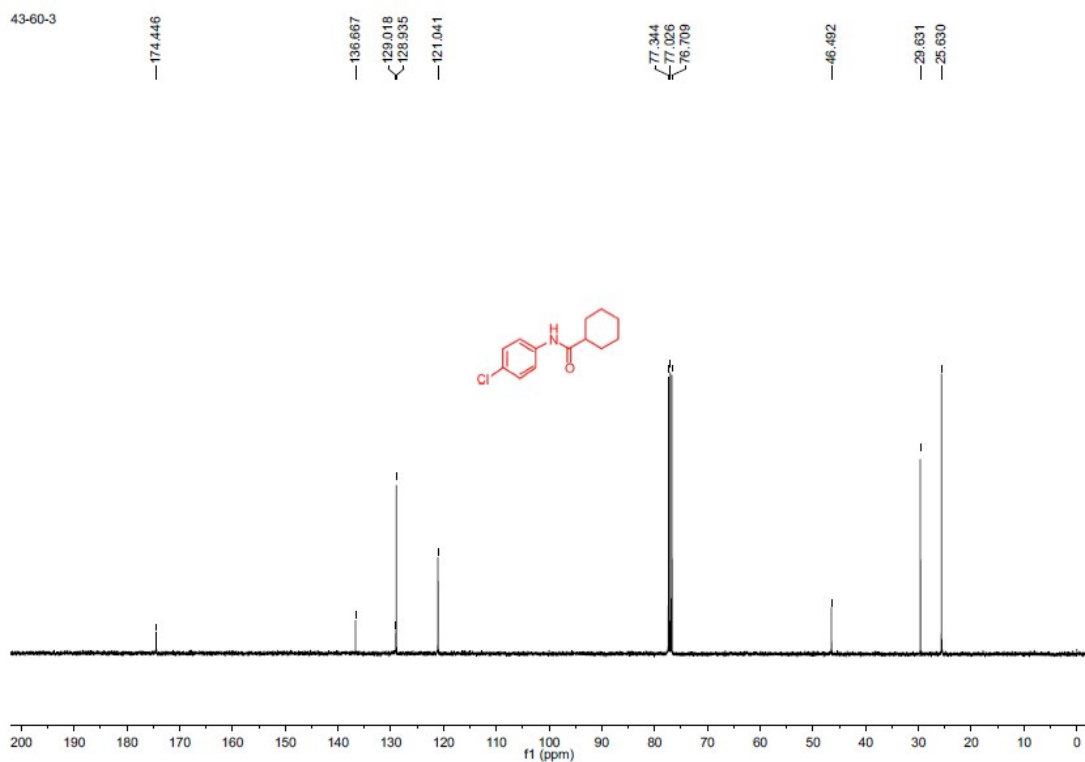

Figure S-70 <sup>13</sup>C NMR spectrum of **3dj** (CDCl<sub>3</sub>)

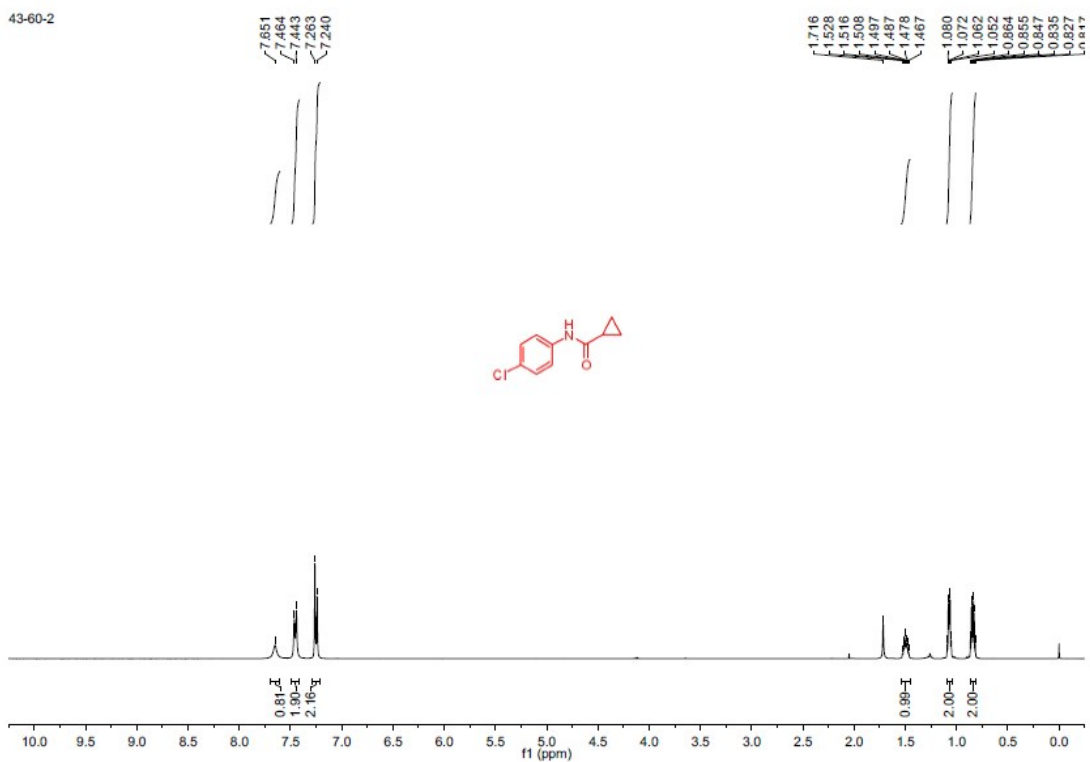

Figure S-71  $^1\text{H}$  NMR spectrum of **3dk** ( $\text{CDCl}_3$ )

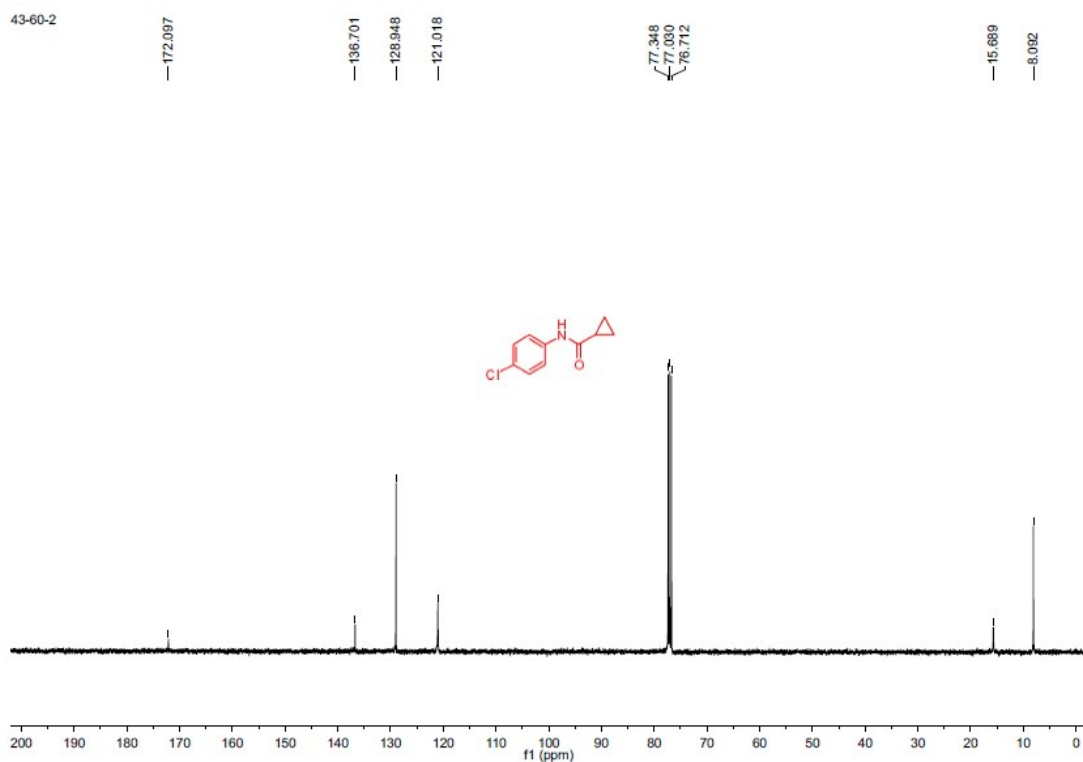

Figure S-72  $^{13}\text{C}$  NMR spectrum of **3dk** ( $\text{CDCl}_3$ )

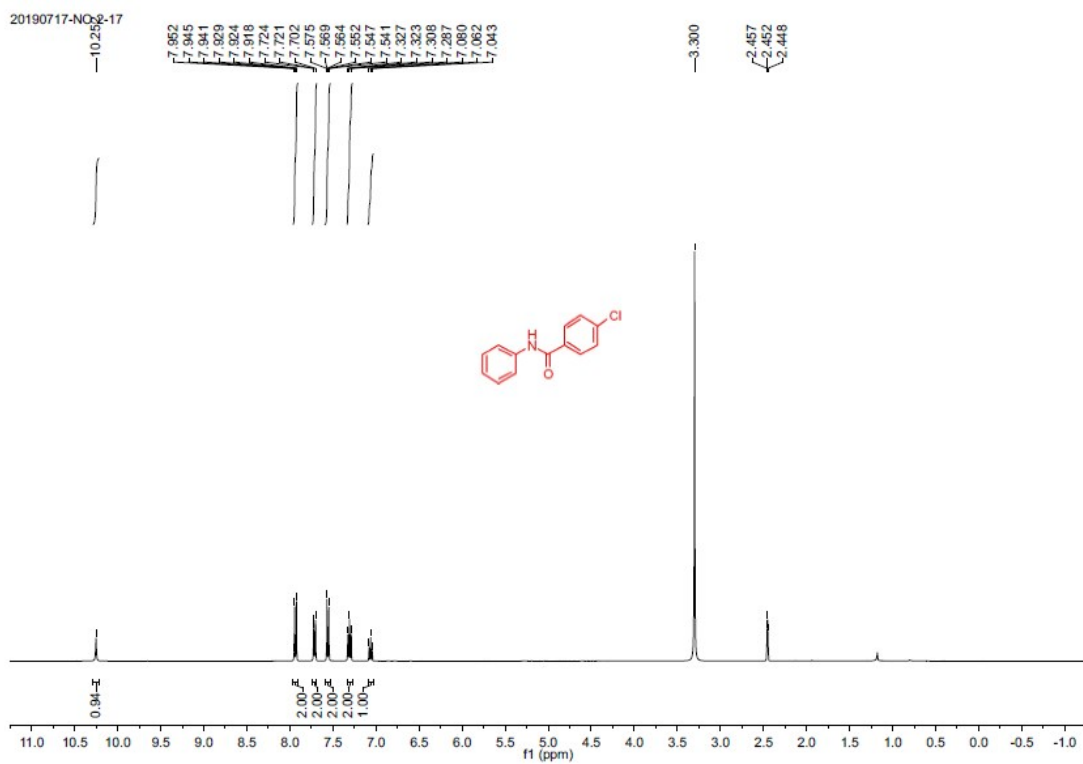

Figure S-73  $^1\text{H}$  NMR spectrum of **5ad** ( $\text{DMSO-}d_6$ )

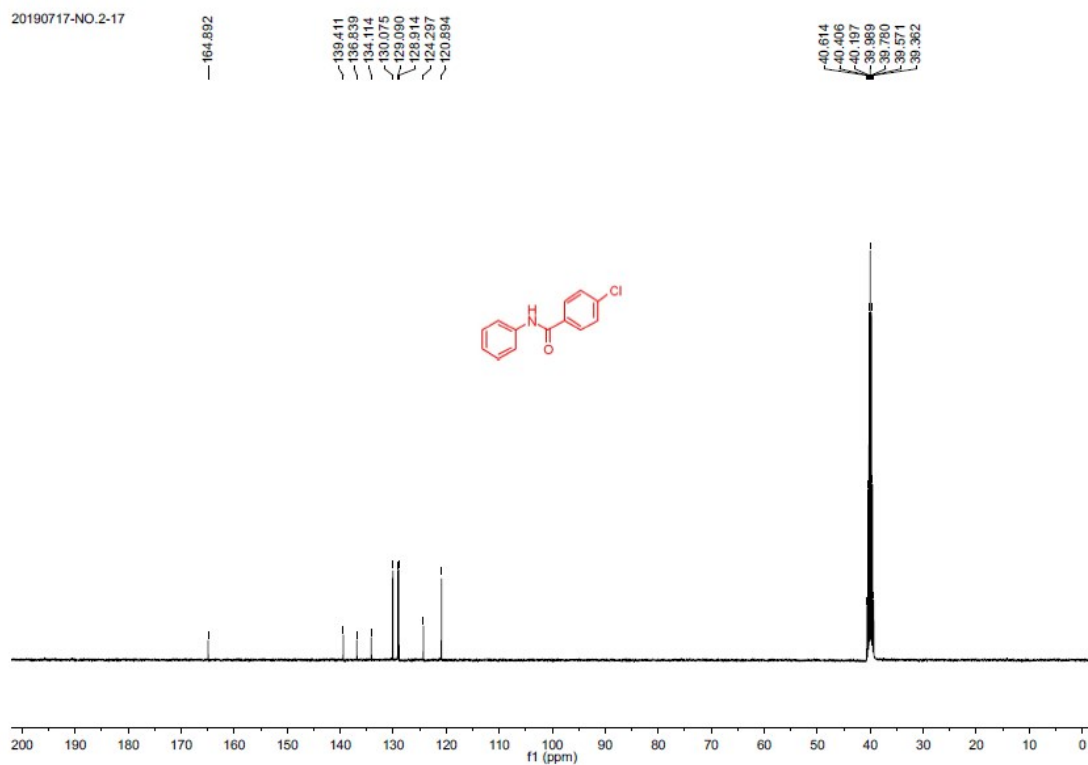

Figure S-74  $^{13}\text{C}$  NMR spectrum of **5ad** ( $\text{DMSO-}d_6$ )

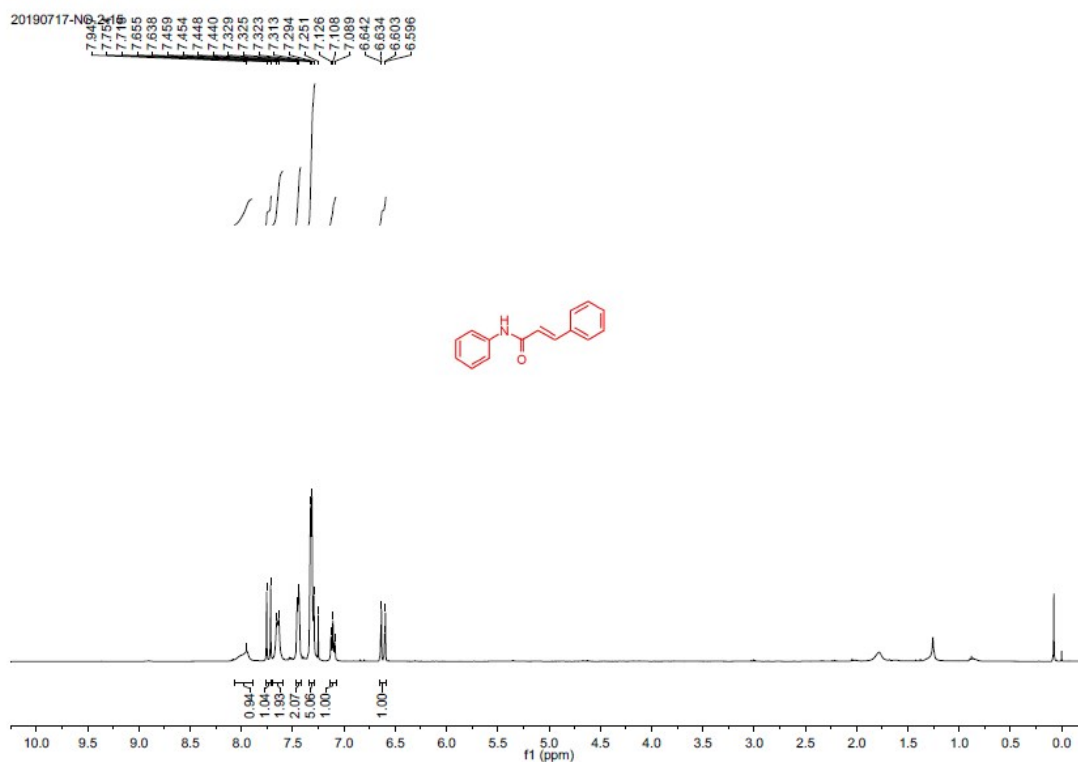

Figure S-75  $^1\text{H}$  NMR spectrum of **5ae** ( $\text{CDCl}_3$ )

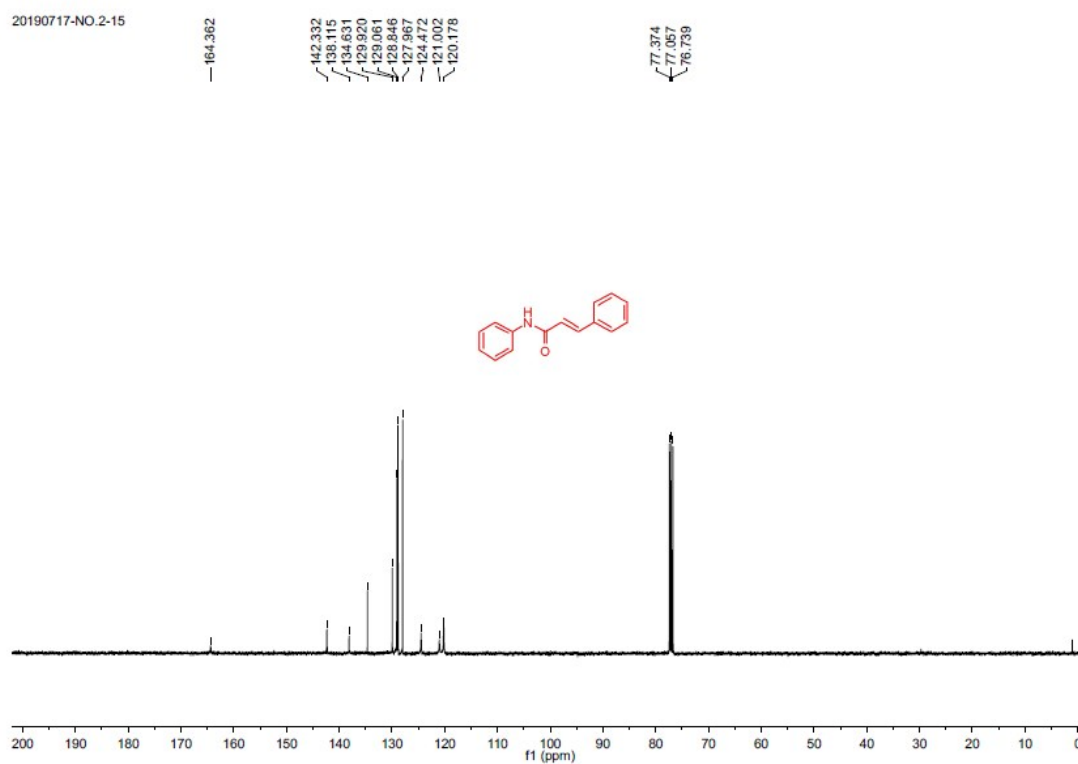

Figure S-76  $^{13}\text{C}$  NMR spectrum of **5ae** ( $\text{CDCl}_3$ )



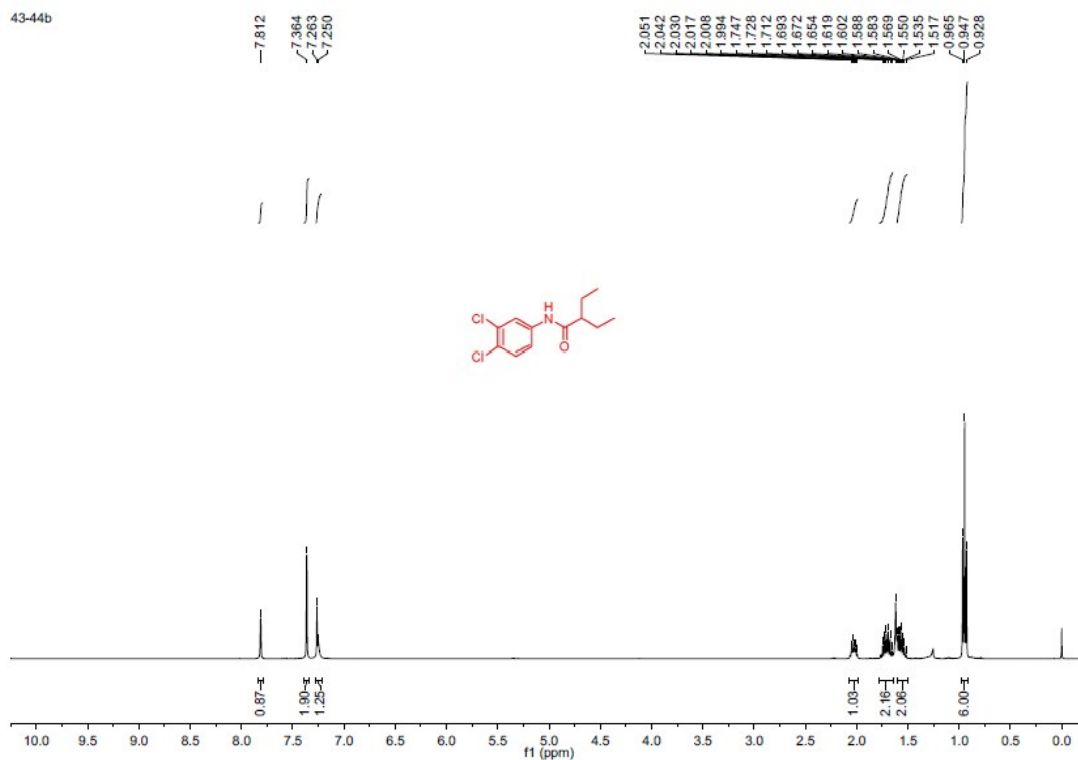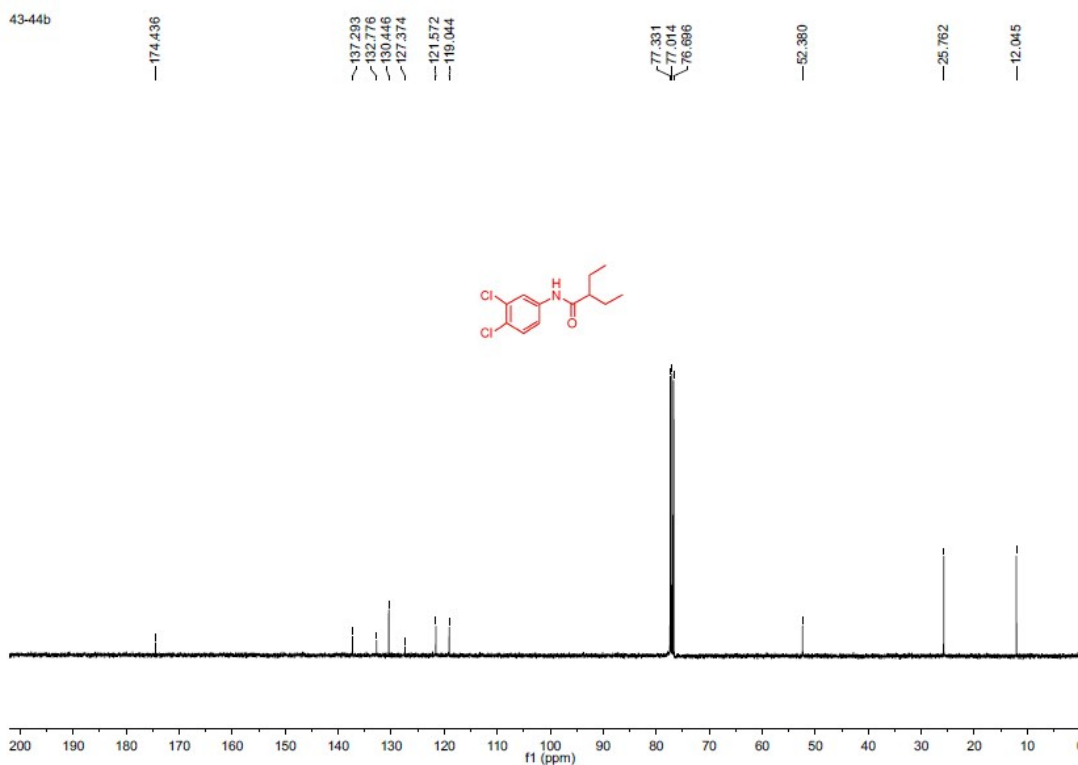

Supplement: d0qo01264e1.pdf [file d0qo01264e1.pdf]
